# Supplementary material for: A combination of polarity reversal, Diels–Alder cycloaddition and skeletal remodeling to access pyridine-fused nitrones
Source: Royal Society of Chemistry journal article supplement (doi:10.1039/d2cc00155a), 2022-01-01

## Supporting Information

# A combination of polarity reversal, Diels-Alder cycloaddition and skeletal remodeling to access pyridine fused nitrones

Huabin Han,<sup>a</sup> Chaoyang Li,<sup>a</sup> Xinyue Niu,<sup>a</sup> Yuxia Wang,<sup>a</sup> Wenjing Zhang,<sup>b,\*</sup> and Qilin Wang<sup>a,\*</sup>

<sup>a</sup> College of Chemistry and Chemical Engineering, Henan University, Kaifeng 475004, China

<sup>b</sup> Green Catalysis Center, and College of Chemistry, Zhengzhou University, Zhengzhou 450001, China

E-mail: wangqilin@henu.edu.cn, zhangwj@zzu.edu.cn

### Table of Contents

|                                                          |     |
|----------------------------------------------------------|-----|
| 1. General methods.....                                  | S2  |
| 2. Mechanistic studies.....                              | S2  |
| 3. Experimental data for the formation of <b>3</b> ..... | S21 |
| 4. Methodology application.....                          | S33 |
| 5. Crystal structures.....                               | S36 |
| 6. NMR spectra.....                                      | S40 |

## 1. General methods

NMR spectra were recorded with tetramethylsilane as the internal standard. For compounds **3d**, **3f**, **3i**, **3r**, **4**, **5** and **7**,  $^1\text{H}$  NMR spectra were recorded at 400 MHz, and  $^{13}\text{C}$  NMR spectra were recorded at 100 MHz (Bruker Avance). For other products,  $^1\text{H}$  NMR spectra were recorded at 300 MHz, and  $^{13}\text{C}$  NMR spectra were recorded at 75 MHz (Bruker Avance). For compounds **3c** and **3m**,  $^{19}\text{F}$  NMR spectra were recorded at 376 MHz (Bruker Avance).  $^1\text{H}$  NMR chemical shifts ( $\delta$ ) are reported in ppm relative to tetramethylsilane (TMS) with the solvent signal as the internal standard ( $\text{CDCl}_3$  at 7.26 ppm,  $(\text{CD}_3)_2\text{SO}$  at 2.50 ppm).  $^{13}\text{C}$  NMR chemical shifts are reported in ppm from tetramethylsilane (TMS) with the solvent resonance as the internal standard ( $\text{CDCl}_3$  at 77.00 ppm,  $(\text{CD}_3)_2\text{SO}$  at 39.52 ppm). Data are given as: s (singlet), d (doublet), t (triplet), q (quartet), dd (double of doublet), br (broad) or m (multiplets), coupling constants (Hz) and integration. Flash column chromatography was carried out using silica gel eluting with ethyl acetate and petroleum ether. High resolution mass spectra were obtained with the Q-TOF-Premier mass spectrometer. Reactions were monitored by TLC and visualized with ultraviolet light. IR spectra were recorded on a Thermo Fisher Nicolet Avatar 360 FTIR spectrometer on a KBr beam splitter. All the solvents were used directly without any purification.

## 2. Mechanistic studies

Based on the experimental results, a tentative reaction mechanism was proposed to explain the uncommon reaction pathway (Scheme S1, taking the formation of **3a** as an example). This reaction commenced with a dearomative nucleophilic addition between pyridinium salt **1** and piperidine to inverse the polarity of **1** from strong electron-poor substrate to electron-rich  $\pi$ -extended species **A**. The intermediate **A** had a resonance structure of **B**. The D- $\pi$ -A structural character of **A** rendered it a good diene to participate in normal Diels-Alder cycloaddition with *o*-hydroxychalcone **2a** to produce intermediate **C**. The intermediate **C** was easily isomerized into **D** with more conjugated structure with the help of piperidine. Then, piperidine was squeezed out from **D** driven by aromatization, leading to intermediate **E**. **E** was not stable and a ring-opening proceeded subsequently through a 1,5-hydride shift process to give **F**. Followed by an intramolecular nucleophilic addition and dehydration, the desired product **3a** was delivered in the end.

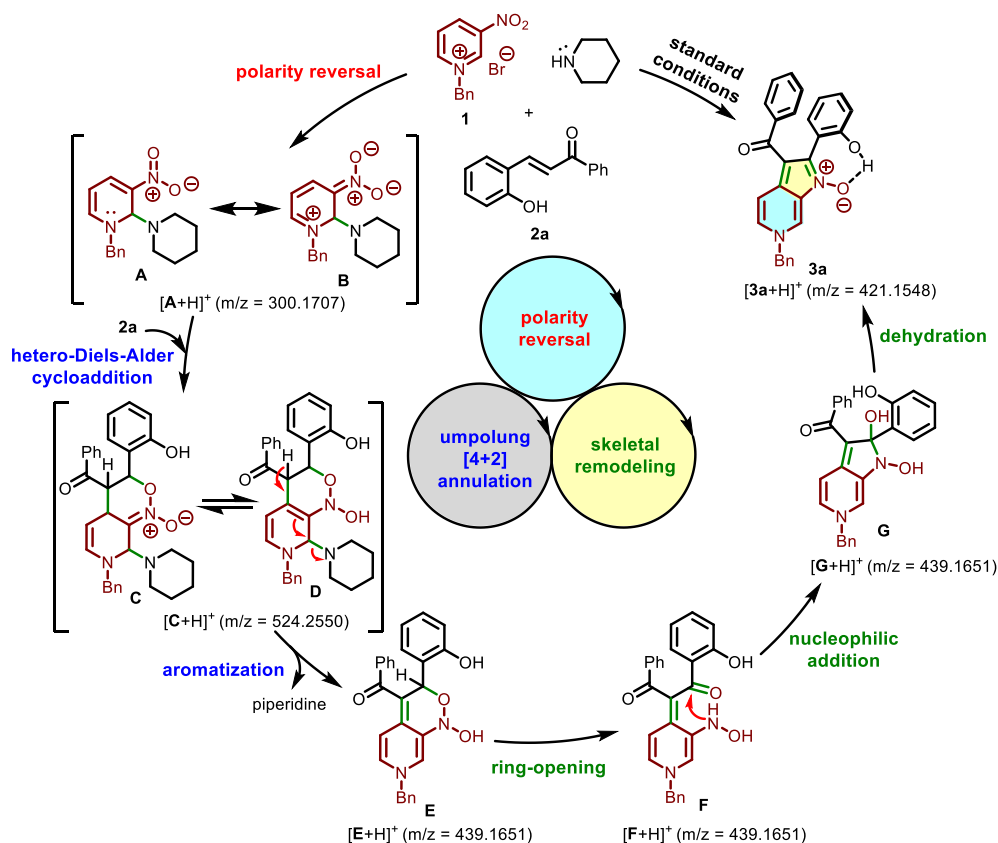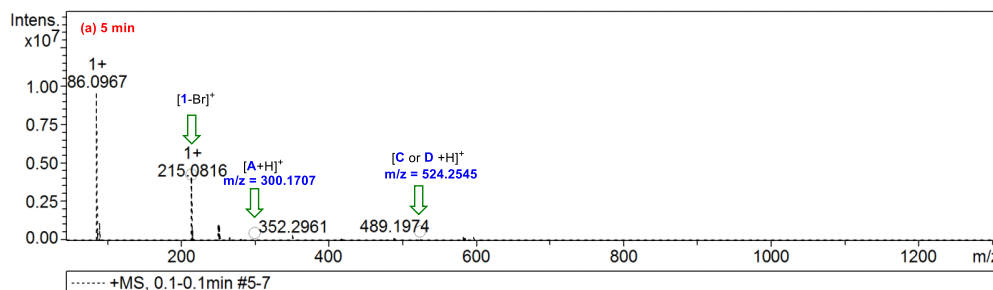

| Meas. m/z | # | Ion Formula                                                   | Sum Formula                                                   | m/z      | Adduct | err [ppm] | z  | mSigma | Score  | rdb  | N-Rule | e <sup>-</sup> Conf |
|-----------|---|---------------------------------------------------------------|---------------------------------------------------------------|----------|--------|-----------|----|--------|--------|------|--------|---------------------|
| 215.0816  | 1 | C <sub>12</sub> H <sub>11</sub> N <sub>2</sub> O <sub>2</sub> | C <sub>12</sub> H <sub>10</sub> N <sub>2</sub> O <sub>2</sub> | 215.0815 | M+H    | -0.6      | 1+ | 0.5    | 100.00 | 9.0  | ok     | even                |
| 300.1707  | 1 | C <sub>17</sub> H <sub>22</sub> N <sub>3</sub> O <sub>2</sub> | C <sub>17</sub> H <sub>21</sub> N <sub>3</sub> O <sub>2</sub> | 300.1707 | M+H    | -0.2      | 1+ | 13.4   | 100.00 | 9.0  | ok     | even                |
| 524.2545  | 1 | C <sub>32</sub> H <sub>34</sub> N <sub>3</sub> O <sub>4</sub> | C <sub>32</sub> H <sub>33</sub> N <sub>3</sub> O <sub>4</sub> | 524.2544 | M+H    | -0.3      | 1+ | 9.6    | 100.00 | 18.0 | ok     | even                |

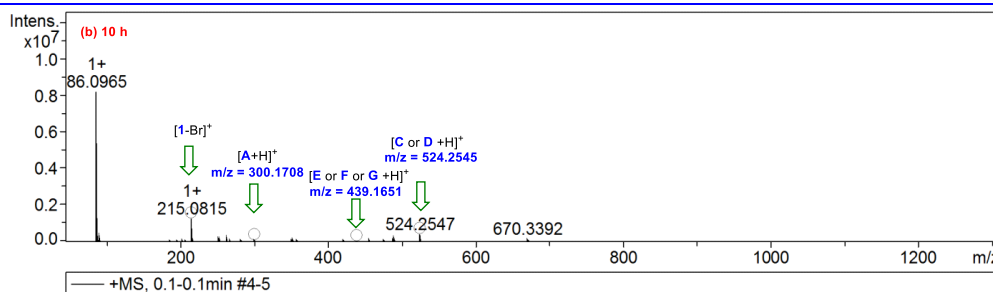

| Meas. m/z | # | Ion Formula                                                   | Sum Formula                                                   | m/z      | Adduct | err [ppm] | z  | mSigma | Score  | rdb  | N-Rule | e <sup>-</sup> Conf |
|-----------|---|---------------------------------------------------------------|---------------------------------------------------------------|----------|--------|-----------|----|--------|--------|------|--------|---------------------|
| 215.0815  | 1 | C <sub>12</sub> H <sub>11</sub> N <sub>2</sub> O <sub>2</sub> | C <sub>12</sub> H <sub>10</sub> N <sub>2</sub> O <sub>2</sub> | 215.0815 | M+H    | -0.1      | 1+ | 0.4    | 100.00 | 9.0  | ok     | even                |
| 300.1708  | 1 | C <sub>17</sub> H <sub>22</sub> N <sub>3</sub> O <sub>2</sub> | C <sub>17</sub> H <sub>21</sub> N <sub>3</sub> O <sub>2</sub> | 300.1707 | M+H    | -0.5      | 1+ | 31.3   | 100.00 | 9.0  | ok     | even                |
| 439.1651  | 1 | C <sub>27</sub> H <sub>23</sub> N <sub>2</sub> O <sub>4</sub> | C <sub>27</sub> H <sub>22</sub> N <sub>2</sub> O <sub>4</sub> | 439.1652 | M+H    | 0.4       | 1+ | n.a.   | 100.00 | 18.0 | ok     | even                |
| 524.2547  | 1 | C <sub>32</sub> H <sub>34</sub> N <sub>3</sub> O <sub>4</sub> | C <sub>32</sub> H <sub>33</sub> N <sub>3</sub> O <sub>4</sub> | 524.2544 | M+H    | -0.5      | 1+ | 2.0    | 100.00 | 18.0 | ok     | even                |

**Figure S1** (a) Full HRMS spectra of the model reaction for 5 min; (b) Full HRMS spectra of the

model reaction for 10 h.

To get some evidences, we tried to detect the intermediate of the crude reaction mixture among **1**, **2a** and piperidine under optimized conditions by HRMS analysis. As shown in Figure S1, after the reaction proceeded for 5 min, we could obtain the signal peaks of intermediates **A**, **C** and **D**. After the reaction proceeded for 10 h, we also detected the signal peaks of intermediates **E**, **F** and **G**.

(a) The relative Gibbs free energies ( $\Delta G$ ) of the transition states and the addition products with  $\text{Br}^-$  absent or present, and the Laplacian of the electron density at the bond (3,-1) critical point ( $\nabla^2\rho_{\text{BCP}}$ ) for each transition state.

|                                       |                          |       | C2    | C4    | C6   |
|---------------------------------------|--------------------------|-------|-------|-------|------|
| $\Delta G$<br>(kcal/mol)              | $\text{Br}^-$<br>absent  | TS    | 8.9   | 9.8   | 10.4 |
|                                       |                          | Pro   | 2.4   | -2.0  | -1.6 |
|                                       | $\text{Br}^-$<br>present | TS    | 6.3   | 9.0   | 8.8  |
|                                       |                          | Pro   | -2.3  | -5.7  | -0.8 |
| $\nabla^2\rho_{\text{BCP}}$<br>(a.u.) | N-H...Br                 | 0.052 | 0.047 | 0.041 |      |
|                                       | LP... $\pi$              | 0.042 | 0.043 | 0.049 |      |

(b) The optimized geometries and NCI analysis for transition state corresponding to addition at the C2, C4 and C6 position, respectively.

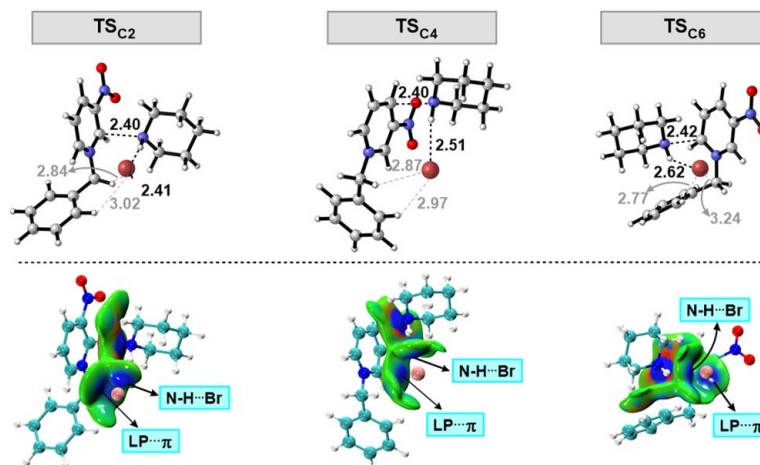

**Figure S2** The DFT computational results

In order to get deeper insights into the regioselectivity for the amine addition on C2, C4 or C6 of the 3-nitropyridinium, the Gibbs free energy barriers were calculated by using the density functional theory (DFT) method. As shown in Figure S2a, the selectivity is poor when the  $\text{Br}^-$  anion is not involved during the addition process because the barriers for reaction at the C2, C4 and C6 position are similar. Instead, presence of  $\text{Br}^-$  could not only lower the reaction barrier, but also induce the distinctive C2-selectivity. Although the C4 addition product is more stable than the

C2 or C6 addition product (well consistent with experimental results<sup>[1-3]</sup>), the barrier via TS<sub>C2</sub> is more than 2.5 kcal/mol lower than that corresponding to reactions at the other two positions. In addition, the barrier for the reverse reaction via TS<sub>C4</sub> is 14.7 kcal/mol, indicating an equilibrium process. The noncovalent interaction (NCI) combined with the atoms in molecules (AIM) analyses afford useful information for understanding the origin. As illustrated in Figure S2b, the NCI maps indicate that it should be the N–H...Br interaction between the piperidine and the bromine anion and the LP... $\pi$  interaction between the bromine anion and the pyridinium that exert profound influence onto the stability of the transition states. The AIM analysis show that the value of  $\nabla^2\rho_{\text{BCP}}$  (Laplacian of the electron density at the bond (3,-1) critical point) of these two interactions corresponds quantitatively well with the relative barriers of reactions at distinctive positions. In particular, the  $\nabla^2\rho_{\text{BCP}}$  value indicates the most and least significant N–H...Br interaction in TS<sub>C2</sub> and TS<sub>C6</sub>, respectively, and contrarily the strongest and weakest LP... $\pi$  interaction in TS<sub>C6</sub> and TS<sub>C2</sub>, respectively. As a result, discrepancy of the noncovalent interaction between the bromine anion and the other two reagents brings about the regioselectivity.

## DFT calculations

### 2.1 Method

The density functional theory (DFT)<sup>[4]</sup> calculations were performed by using the *Gaussian 09* program.<sup>[5]</sup> The geometric structures of all involved transition states were optimized by using the M06-2X<sup>[6]</sup> density functional, combined with the 6-31+G(d,p)<sup>[7]</sup> basis set. The solvent effects of *i*-PrOH were simulated by the SMD model.<sup>[8]</sup> The harmonic frequency calculations were conducted at the same level to corroborate each transition state has one and only one imaginary frequency and other structures have no imaginary frequency. The atoms in molecules (AIM)<sup>[9]</sup> and the non-covalent interaction (NCI) analysis was conducted to clarify the origin of regioselectivity, which was plotted by VMD<sup>[10]</sup> (version 1.9.3) and Multiwfn<sup>[11]</sup> (version 3.6) programs. The key optimized geometries involved in the reaction were illustrated using the CYLview program.<sup>[12]</sup>

### 2.2 Energies of all the optimized structures.

**Table S1. Calculated Energies and Imaginary Frequency of the Transition State.**

| Geometry | ZPE <sup>1</sup> | G(thermo) <sup>2</sup> | E <sup>3</sup> | G <sup>4</sup> | Imaginary Frequency |
|----------|------------------|------------------------|----------------|----------------|---------------------|
|----------|------------------|------------------------|----------------|----------------|---------------------|

|                               |         |         |             |             |         |
|-------------------------------|---------|---------|-------------|-------------|---------|
| <b>1.00000</b>                | 0.21596 | 0.16254 | -3295.09713 | -3295.15056 |         |
| <b>pipерidine</b>             | 0.16012 | 0.12737 | -251.64670  | -251.67945  |         |
| <b>1-noBr</b>                 | 0.21637 | 0.17098 | -723.11238  | -723.15777  |         |
| <b>TS<sub>C2</sub></b>        | 0.37755 | 0.31287 | -3546.75527 | -3546.81994 | -78.0i  |
| <b>Pro<sub>C2</sub></b>       | 0.38051 | 0.31956 | -3546.77265 | -3546.83360 |         |
| <b>TS<sub>C4</sub></b>        | 0.37762 | 0.31382 | -3546.75190 | -3546.81570 | -133.7i |
| <b>Pro<sub>C4</sub></b>       | 0.38135 | 0.32074 | -3546.77853 | -3546.83914 |         |
| <b>TS<sub>C6</sub></b>        | 0.37788 | 0.31704 | -3546.75515 | -3546.81598 | -83.8i  |
| <b>Pro<sub>C6</sub></b>       | 0.38160 | 0.32206 | -3546.77170 | -3546.83124 |         |
| <b>TSC2-noBr:</b>             | 0.37748 | 0.32020 | -974.76576  | -974.82305  | -119.9i |
| <b>Pro<sub>C2</sub>-noBr:</b> | 0.38141 | 0.32474 | -974.77678  | -974.83345  |         |
| <b>TSC4-noBr:</b>             | 0.37748 | 0.31910 | -974.76325  | -974.82163  | -133.5i |
| <b>Pro<sub>C4</sub>-noBr:</b> | 0.38171 | 0.32485 | -974.78348  | -974.84035  |         |
| <b>TSC6-noBr:</b>             | 0.37744 | 0.32084 | -974.76404  | -974.82064  | -143.6i |
| <b>Pro<sub>C6</sub>-noBr:</b> | 0.38150 | 0.32586 | -974.78412  | -974.83975  |         |

<sup>1</sup>Zero-point Energies. <sup>2</sup>Thermal corrections to Gibbs free energies. <sup>3</sup>ZPE plus electronic energies.

<sup>4</sup>G(thermo) plus electronic energies.

## References

- 1 R. E. Lyle and G. J. Gauthier, *Tetrahedron Lett.* 1965, **6**, 4615-4621.
- 2 G. Bertuzzi, A. Sinisi, L. Caruana, A. Mazzanti, M. Fochi and L. Bernardi, *ACS Catal.* 2016, **6**, 6473-6477.
- 3 G. Bertuzzi, A. Sinisi, D. Pecorari, L. Caruana, A. Mazzanti, L. Bernardi and M. Fochi, *Org. Lett.* 2017, **19**, 834-837.
- 4 W. Kohn and L. J. Sham, *Phys. Rev.* 1965, **140**, A1133-A1138.
- 5 M. J. Frisch, G. W. Trucks, H. B. Schlegel, G. E. Scuseria, M. A. Robb, J. R. Cheeseman, G. Scalmani, V. Barone, B. Mennucci, G. A. Petersson, H. Nakatsuji, M. Caricato, X. Li, H. P. Hratchian, A. F. Izmaylov, J. Bloino, G. Zheng, J. L. Sonnenberg, M. Hada, M. Ehara, K. Toyota, R. Fukuda, J. Hasegawa, M. Ishida, T. Nakajima, Y. Honda, O. Kitao,

- H. Nakai, T. Vreven, J. A. Montgomery, J. E. P. Jr., F. Ogliaro, M. Bearpark, J. J. Heyd, E. Brothers, K. N. Kudin, V. N. Staroverov, T. Keith, R. Kobayashi, J. Normand, K. Raghavachari, A. Rendell, J. C. Burant, S. S. Iyengar, J. Tomasi, M. Cossi, N. Rega, J. M. Millam, M. Klene, J. E. Knox, J. B. Cross, V. Bakken, C. Adamo, J. Jaramillo, R. Gomperts, R. E. Stratmann, O. Yazyev, A. J. Austin, R. Cammi, C. Pomelli, J. W. Ochterski, R. L. Martin, K. Morokuma, V. G. Zakrzewski, G. A. Voth, P. Salvador, J. J. Dannenberg, S. Dapprich, A. D. Daniels, O. Farkas, J. B. Foresman, J. V. Ortiz, J. Cioslowski and D. J. Fox, **2010**.
- 6 Y. Zhao and D. G. Truhlar, *Theor. Chem. Acc.* 2008, **120**, 215-241.
- 7 J. D. Dill and J. A. Pople, *J. Chem. Phys.* 1975, **62**, 2921-2923.
- 8 A. V. Marenich, C. J. Cramer and D. G. Truhlar, *J. Phys. Chem. B* 2009, **113**, 6378-6396.
- 9 R. F. W. Bader, *Atoms in Molecules: A Quantum Theory*, Oxford, 1994.
- 10 W. Humphrey, A. Dalke and K. Schulten, *J. Mol. Graphics* 1996, **14**, 33-38.
- 11 T. Lu and F. Chen, *J. Comput. Chem.* 2012, **33**, 580-592.
- 12 L. C. Y., *CYLview, 1.0b, Universit de Sherbrooke* <http://www.cylview.org>, 2009.

### 2.3 Cartesian coordination of all the optimized structures

|          |             |             |             |
|----------|-------------|-------------|-------------|
| <b>1</b> |             |             |             |
| 0 1      |             |             |             |
| O        | -1.22505800 | -0.75038900 | -2.49395600 |
| O        | -3.13599500 | -1.61967200 | -1.99251400 |
| N        | -0.11185600 | -0.51389900 | 1.34269000  |
| N        | -2.04165500 | -1.17122700 | -1.69334300 |
| C        | 2.55604100  | 0.94065100  | -0.22201400 |
| C        | 3.55976300  | 0.71426400  | -1.16471200 |
| C        | 4.25873500  | -0.49221200 | -1.16701300 |
| C        | 3.94917300  | -1.48011000 | -0.22959200 |
| C        | 2.94870400  | -1.25557800 | 0.71302600  |
| C        | 2.24888100  | -0.04447100 | 0.72064700  |
| C        | 1.15310300  | 0.18212400  | 1.72546500  |
| C        | -0.47099300 | -0.54881200 | 0.05073000  |
| C        | -1.68912900 | -1.12751800 | -0.27956300 |
| C        | -2.58419900 | -1.55667200 | 0.67970800  |
| C        | -2.20311300 | -1.42798400 | 2.01543800  |
| C        | -0.96718500 | -0.89297100 | 2.31580700  |

|    |             |             |             |
|----|-------------|-------------|-------------|
| H  | 3.79551200  | 1.48124400  | -1.89631700 |
| H  | 5.04146700  | -0.66556900 | -1.89958400 |
| H  | 4.49155600  | -2.42081800 | -0.22942500 |
| H  | 2.70737000  | -2.02082200 | 1.44737900  |
| H  | 1.42525700  | -0.20280500 | 2.70876000  |
| H  | 0.88896800  | 1.24183600  | 1.79582900  |
| H  | 0.24172800  | -0.22693100 | -0.69454900 |
| H  | -3.54355000 | -1.97677400 | 0.39870100  |
| H  | -2.85898800 | -1.73548800 | 2.81989400  |
| H  | -0.61545200 | -0.76960800 | 3.33403900  |
| H  | 1.99648600  | 1.87343500  | -0.22400800 |
| Br | -1.14760100 | 2.23184000  | -0.00462700 |

**piperidine**

0 1

|   |             |             |             |
|---|-------------|-------------|-------------|
| C | 0.73545000  | -1.21677800 | 0.20491900  |
| C | -0.72727100 | -1.25147400 | -0.22819500 |
| C | -1.45305600 | 0.01421800  | 0.23564800  |
| C | -0.70255200 | 1.26538600  | -0.22825500 |
| C | 0.75917500  | 1.20217400  | 0.20499900  |
| H | -2.48474600 | 0.02432800  | -0.13297000 |
| H | -0.77163700 | -1.32268500 | -1.32289000 |
| H | -1.21136300 | -2.14572000 | 0.17971500  |
| H | 0.78014400  | -1.24625800 | 1.30955800  |
| H | 1.26921800  | -2.09527600 | -0.17040300 |
| H | -0.74551900 | 1.33740900  | -1.32299100 |
| H | -1.16889100 | 2.16899900  | 0.17960900  |
| H | 1.31002200  | 2.07005200  | -0.17036400 |
| H | 0.80465900  | 1.23066700  | 1.30962800  |
| H | -1.50488400 | 0.01473700  | 1.33372600  |
| N | 1.38381000  | -0.01349300 | -0.32379300 |
| H | 2.36585900  | -0.02295600 | -0.06076500 |

**1-noBr**

1 1

|   |             |             |             |
|---|-------------|-------------|-------------|
| O | -2.43103400 | -2.34145000 | -0.40389600 |
| O | -3.93436100 | -1.37682400 | 0.80792300  |
| N | -0.30841400 | 1.05855700  | -0.73435000 |
| N | -2.90688700 | -1.37356800 | 0.15931200  |
| C | 2.53800400  | -0.91388500 | -0.96321000 |
| C | 3.47429400  | -1.57713400 | -0.16817700 |
| C | 3.91013700  | -0.99975500 | 1.02280900  |
| C | 3.41377900  | 0.24477500  | 1.41924200  |
| C | 2.48417000  | 0.90967300  | 0.62419100  |
| C | 2.04249200  | 0.33034700  | -0.57048800 |
| C | 1.02034000  | 1.03993500  | -1.42233300 |



|   |             |             |             |
|---|-------------|-------------|-------------|
| C | -0.98196200 | -0.09799200 | -0.62400600 |
| C | -2.18375700 | -0.09987800 | 0.05006800  |
| C | -2.71319400 | 1.05100700  | 0.61887300  |
| C | -1.98407700 | 2.22509100  | 0.48155800  |
| C | -0.78058700 | 2.20330700  | -0.20283500 |
| H | 3.85914700  | -2.54322700 | -0.48045900 |
| H | 4.63756400  | -1.51550800 | 1.64255600  |
| H | 3.75539900  | 0.69722100  | 2.34524900  |
| H | 2.09790900  | 1.88049600  | 0.92962700  |
| H | 1.28534900  | 2.08196600  | -1.60328800 |
| H | 0.87115800  | 0.53534300  | -2.37849600 |
| H | -0.54314900 | -0.98512300 | -1.06829100 |
| H | -3.66023100 | 1.02422600  | 1.14666300  |
| H | -2.33878800 | 3.15893800  | 0.89927300  |
| H | -0.16717400 | 3.08588300  | -0.34140400 |
| H | 2.19524900  | -1.36189700 | -1.89252800 |

**TS<sub>c2</sub>**

0 1

|   |             |             |             |
|---|-------------|-------------|-------------|
| O | 2.67819900  | 2.80603500  | -1.18516500 |
| O | 3.01550800  | 3.53052400  | 0.81957500  |
| N | -0.69869800 | 0.91916700  | -0.13974700 |
| N | 2.36582800  | 2.90799400  | -0.00686300 |
| C | -3.66400000 | 1.30647200  | -1.20704400 |
| C | -5.04016300 | 1.33277200  | -0.99488700 |
| C | -5.69194500 | 0.19979800  | -0.50202900 |
| C | -4.96317700 | -0.95394300 | -0.21692400 |
| C | -3.58254900 | -0.97934900 | -0.42186200 |
| C | -2.92999500 | 0.14995400  | -0.92188300 |
| C | -1.44346000 | 0.12631000  | -1.15751700 |
| C | 0.46084100  | 1.49581100  | -0.51893100 |
| C | 1.16048000  | 2.23858800  | 0.43144200  |
| C | 0.78171400  | 2.26396500  | 1.76408200  |
| C | -0.35208300 | 1.54908600  | 2.13057200  |
| C | -1.06209100 | 0.86385300  | 1.15961100  |
| H | -5.60567000 | 2.23217300  | -1.21997700 |
| H | -6.76586400 | 0.21839500  | -0.34094800 |
| H | -5.46695000 | -1.83493500 | 0.16976900  |
| H | -3.00274500 | -1.86674900 | -0.17834100 |
| H | -1.05102000 | -0.89376000 | -1.09587300 |
| H | -1.19054200 | 0.56336800  | -2.12502900 |
| H | 0.67388000  | 1.54839000  | -1.57736700 |
| H | 1.35804800  | 2.82860700  | 2.48898800  |
| H | -0.68662100 | 1.51011600  | 3.15904400  |
| H | -1.96987000 | 0.31945800  | 1.38196100  |
| H | -3.15469000 | 2.18425700  | -1.59918800 |

|    |             |             |             |
|----|-------------|-------------|-------------|
| C  | 2.05669400  | -1.04593200 | -1.92224200 |
| C  | 2.80100800  | -2.38326800 | -1.85959900 |
| C  | 4.10948000  | -2.23079600 | -1.07987600 |
| C  | 3.84797100  | -1.62190100 | 0.30043900  |
| C  | 3.06960800  | -0.31006000 | 0.16436600  |
| H  | 4.61242900  | -3.19902600 | -0.98156500 |
| H  | 2.15733600  | -3.11922000 | -1.35866200 |
| H  | 2.99266400  | -2.75054600 | -2.87445700 |
| H  | 2.64087400  | -0.32046900 | -2.50675800 |
| H  | 1.08745400  | -1.16294600 | -2.42023000 |
| H  | 3.25483300  | -2.32067900 | 0.90551900  |
| H  | 4.78891400  | -1.44095900 | 0.83271400  |
| H  | 2.81987200  | 0.09534700  | 1.15268500  |
| H  | 3.69348800  | 0.43211400  | -0.35470500 |
| H  | 4.78792400  | -1.57241500 | -1.64102300 |
| N  | 1.82841800  | -0.47422100 | -0.59407800 |
| H  | 1.20445700  | -1.09070000 | -0.05945200 |
| Br | -0.41562000 | -2.18660100 | 1.35617500  |

**Proc2**

0 1

|   |             |             |             |
|---|-------------|-------------|-------------|
| O | 2.90130900  | 2.59331800  | -1.15539300 |
| O | 2.94625200  | 3.72244300  | 0.69286300  |
| N | -0.56017600 | 0.81136800  | -0.12519600 |
| N | 2.45946000  | 2.83911400  | -0.02182000 |
| C | -3.56266300 | 1.49669400  | -1.03581100 |
| C | -4.92299800 | 1.58184700  | -0.74713700 |
| C | -5.60978000 | 0.45741000  | -0.28391700 |
| C | -4.93175700 | -0.74828200 | -0.10755000 |
| C | -3.56799100 | -0.83225600 | -0.39204400 |
| C | -2.87897000 | 0.28861400  | -0.86211200 |
| C | -1.40807100 | 0.20124700  | -1.17378600 |
| C | 0.81716100  | 1.06047900  | -0.47907000 |
| C | 1.38950600  | 2.06648400  | 0.45065300  |
| C | 0.93882200  | 2.18211000  | 1.74794500  |
| C | -0.17266400 | 1.43952200  | 2.14902300  |
| C | -0.92353300 | 0.81405800  | 1.16299300  |
| H | -5.44870000 | 2.52165200  | -0.88825900 |
| H | -6.67110500 | 0.52206400  | -0.06235700 |
| H | -5.46240800 | -1.62359700 | 0.25554700  |
| H | -3.02683100 | -1.76258600 | -0.23486600 |
| H | -1.11560900 | -0.84901000 | -1.29393300 |
| H | -1.18116200 | 0.73866500  | -2.09954400 |
| H | 0.87152100  | 1.39849400  | -1.51450100 |
| H | 1.44274400  | 2.85666800  | 2.43293200  |
| H | -0.52936600 | 1.44381800  | 3.16958300  |

|    |             |             |             |
|----|-------------|-------------|-------------|
| H  | -1.89156400 | 0.38038500  | 1.38638100  |
| H  | -3.02621100 | 2.36947000  | -1.40180000 |
| C  | 1.87193100  | -0.75585300 | -1.86872900 |
| C  | 2.43433800  | -2.16863700 | -1.87898400 |
| C  | 3.69791900  | -2.25169600 | -1.02515700 |
| C  | 3.39173300  | -1.77107300 | 0.39181700  |
| C  | 2.79821500  | -0.36587300 | 0.40021400  |
| H  | 4.07377100  | -3.27884400 | -1.00072700 |
| H  | 1.67466600  | -2.86288100 | -1.49842600 |
| H  | 2.63892300  | -2.43949300 | -2.91916000 |
| H  | 2.58727100  | -0.03505000 | -2.27956100 |
| H  | 0.94214000  | -0.68906700 | -2.43796800 |
| H  | 2.68405600  | -2.45653400 | 0.87248500  |
| H  | 4.29694400  | -1.74520200 | 1.00611600  |
| H  | 2.49026400  | -0.08179500 | 1.40762400  |
| H  | 3.51291000  | 0.36641600  | 0.01143700  |
| H  | 4.48191800  | -1.62488000 | -1.47023800 |
| N  | 1.57295400  | -0.31051000 | -0.46829100 |
| H  | 0.90299600  | -1.00982500 | -0.03100900 |
| Br | -0.32858600 | -2.34895800 | 1.08307200  |

#### TS<sub>c4</sub>

0 1

|   |             |             |             |
|---|-------------|-------------|-------------|
| O | 0.48117600  | 1.81842700  | 2.27674600  |
| O | -1.27521800 | 2.88831100  | 1.62283400  |
| N | 1.22225400  | 0.45433600  | -1.42281900 |
| N | -0.31769000 | 2.15871100  | 1.41582500  |
| C | 3.49970600  | -1.30104500 | 0.37668300  |
| C | 4.53488100  | -1.20596900 | 1.30694700  |
| C | 5.51839900  | -0.22768700 | 1.16260900  |
| C | 5.46374600  | 0.66298900  | 0.08875700  |
| C | 4.43298600  | 0.56658000  | -0.84406600 |
| C | 3.44832300  | -0.41703700 | -0.70544200 |
| C | 2.32732400  | -0.50873100 | -1.70406300 |
| C | 0.96515200  | 0.85425500  | -0.17351200 |
| C | -0.12132000 | 1.67318500  | 0.06576700  |
| C | -1.07456500 | 1.94731100  | -0.91696000 |
| C | -0.76280500 | 1.50750100  | -2.22062400 |
| C | 0.36349700  | 0.75891800  | -2.43353300 |
| H | 4.57189300  | -1.89582700 | 2.14489100  |
| H | 6.32425800  | -0.15590100 | 1.88720500  |
| H | 6.22745900  | 1.42660500  | -0.02506200 |
| H | 4.39107000  | 1.25486400  | -1.68534700 |
| H | 2.67662500  | -0.27840100 | -2.71177400 |
| H | 1.86353100  | -1.49923200 | -1.68597300 |
| H | 1.65360900  | 0.56909500  | 0.61082100  |

|    |             |             |             |
|----|-------------|-------------|-------------|
| H  | -1.87790200 | 2.64712600  | -0.73303100 |
| H  | -1.40953100 | 1.74349400  | -3.05637300 |
| H  | 0.63772000  | 0.38465700  | -3.41366500 |
| H  | 2.71570200  | -2.04597800 | 0.49314300  |
| C  | -3.09794300 | 0.27883700  | 1.12407700  |
| C  | -4.00726500 | -0.90778400 | 1.45337300  |
| C  | -5.24397100 | -0.90105400 | 0.55051100  |
| C  | -4.83425300 | -0.85293400 | -0.92424200 |
| C  | -3.89029600 | 0.32682100  | -1.17973500 |
| H  | -5.86674600 | -1.78110500 | 0.74582700  |
| H  | -3.43574800 | -1.83282800 | 1.29723600  |
| H  | -4.29526300 | -0.87159900 | 2.51066700  |
| H  | -3.60583800 | 1.22069100  | 1.37529100  |
| H  | -2.17525600 | 0.22151100  | 1.71327800  |
| H  | -4.31705200 | -1.78454100 | -1.19219200 |
| H  | -5.71497400 | -0.77053000 | -1.57168400 |
| H  | -3.53063100 | 0.31854300  | -2.21531900 |
| H  | -4.43259800 | 1.27109400  | -1.02496400 |
| H  | -5.85630700 | -0.01777400 | 0.78310900  |
| N  | -2.73152200 | 0.32436800  | -0.29157200 |
| H  | -2.12393900 | -0.47743500 | -0.48629100 |
| Br | -0.24024600 | -1.98249300 | 0.19926400  |

**ProC4**

0 1

|   |             |             |             |
|---|-------------|-------------|-------------|
| O | -0.72901200 | 3.09312800  | -1.25032200 |
| O | 1.34025000  | 3.43625100  | -0.73608300 |
| N | -1.11757500 | 0.21794700  | 1.47830300  |
| N | 0.28773600  | 2.80173100  | -0.60920800 |
| C | -3.08785100 | -1.02815800 | -0.75939900 |
| C | -4.04873700 | -0.86443200 | -1.75444500 |
| C | -5.23245400 | -0.17411300 | -1.48351900 |
| C | -5.45189800 | 0.35621800  | -0.21309900 |
| C | -4.49087400 | 0.19153600  | 0.78584300  |
| C | -3.31147100 | -0.50768600 | 0.52196400  |
| C | -2.28271800 | -0.68877400 | 1.60556400  |
| C | -0.93670700 | 1.05922100  | 0.46358300  |
| C | 0.25879200  | 1.72475700  | 0.30093900  |
| C | 1.49052300  | 1.34092400  | 1.04610700  |
| C | 1.05614300  | 0.73048000  | 2.34974600  |
| C | -0.14334200 | 0.14562700  | 2.47399600  |
| H | -3.87478400 | -1.27510800 | -2.74490900 |
| H | -5.98064600 | -0.05140700 | -2.26128200 |
| H | -6.36967300 | 0.89540800  | 0.00244900  |
| H | -4.66025500 | 0.60205600  | 1.77844200  |
| H | -2.72547800 | -0.50923100 | 2.58923200  |

|    |             |             |             |
|----|-------------|-------------|-------------|
| H  | -1.87392800 | -1.70385200 | 1.57628200  |
| H  | -1.76774200 | 1.23491400  | -0.20861100 |
| H  | 2.16022000  | 2.19187900  | 1.19242600  |
| H  | 1.73320800  | 0.73223000  | 3.19551600  |
| H  | -0.45150500 | -0.37419100 | 3.37505300  |
| H  | -2.16101800 | -1.56285400 | -0.95897800 |
| C  | 2.65471500  | 0.74531900  | -1.13143000 |
| C  | 3.42414700  | -0.33911000 | -1.87463200 |
| C  | 4.70033100  | -0.72121400 | -1.12939300 |
| C  | 4.34676800  | -1.14986800 | 0.29241400  |
| C  | 3.56149200  | -0.06710700 | 1.02074100  |
| H  | 5.21937400  | -1.53046900 | -1.65176700 |
| H  | 2.77924500  | -1.21808800 | -1.99045400 |
| H  | 3.64734100  | 0.04317000  | -2.87547000 |
| H  | 3.23501600  | 1.66931700  | -1.05013000 |
| H  | 1.71020500  | 0.95363300  | -1.63787800 |
| H  | 3.74777400  | -2.06867200 | 0.26662800  |
| H  | 5.24488800  | -1.36036600 | 0.88096800  |
| H  | 3.25075500  | -0.41528300 | 2.00641000  |
| H  | 4.15084200  | 0.85012300  | 1.13386300  |
| H  | 5.38222300  | 0.13907200  | -1.09685700 |
| N  | 2.32655200  | 0.30824500  | 0.26325900  |
| H  | 1.71866300  | -0.55462100 | 0.16851500  |
| Br | 0.44220600  | -2.19256800 | -0.25184500 |

**TS<sub>C6</sub>**

0 1

|   |             |             |             |
|---|-------------|-------------|-------------|
| O | 4.31623100  | -1.04296600 | 0.76131300  |
| O | 4.87276200  | 0.28577500  | -0.84600500 |
| N | 0.60452600  | -1.50907500 | -0.69164000 |
| N | 4.07452100  | -0.44561900 | -0.27609900 |
| C | -2.67039600 | -2.44806200 | -0.90274400 |
| C | -4.01955800 | -2.10424200 | -0.80724200 |
| C | -4.46865900 | -1.33783000 | 0.26810500  |
| C | -3.56471900 | -0.90989800 | 1.24246500  |
| C | -2.21502400 | -1.24318400 | 1.14205000  |
| C | -1.76036600 | -2.01753300 | 0.06789800  |
| C | -0.31914500 | -2.45768600 | 0.00336700  |
| C | 1.83885400  | -1.35786100 | -0.17809400 |
| C | 2.76101800  | -0.59856700 | -0.86356300 |
| C | 2.44428800  | 0.02113400  | -2.07819600 |
| C | 1.15996200  | -0.11865900 | -2.55126300 |
| C | 0.21496400  | -0.81686500 | -1.78679100 |
| H | -4.71915600 | -2.44625300 | -1.56409500 |
| H | -5.52034900 | -1.07892200 | 0.34964200  |
| H | -3.91130400 | -0.31586300 | 2.08331800  |

|    |             |             |             |
|----|-------------|-------------|-------------|
| H  | -1.50227600 | -0.90248800 | 1.89066700  |
| H  | 0.08357400  | -2.57273300 | 1.01059900  |
| H  | -0.23276100 | -3.40933500 | -0.52738400 |
| H  | 2.08712000  | -1.90453100 | 0.72041400  |
| H  | 3.19642300  | 0.58234500  | -2.62156900 |
| H  | 0.84304700  | 0.34291900  | -3.47817500 |
| H  | -0.78481200 | -1.01410300 | -2.15129600 |
| H  | -2.32437800 | -3.06910300 | -1.72621500 |
| C  | 0.09521800  | 2.24759900  | -0.75391100 |
| C  | -0.43391800 | 3.43473200  | 0.05498200  |
| C  | -1.86117900 | 3.78929600  | -0.37219100 |
| C  | -2.76816800 | 2.55629800  | -0.31296400 |
| C  | -2.15270100 | 1.40180200  | -1.10863300 |
| H  | -2.26249900 | 4.59073700  | 0.25801900  |
| H  | -0.41794800 | 3.15581600  | 1.11724300  |
| H  | 0.23398000  | 4.29542200  | -0.06888100 |
| H  | 0.19662900  | 2.52966400  | -1.81305900 |
| H  | 1.08244900  | 1.94562100  | -0.38985500 |
| H  | -2.88892900 | 2.23702900  | 0.73240200  |
| H  | -3.76763500 | 2.78703200  | -0.70035900 |
| H  | -2.76343800 | 0.49654700  | -1.02486800 |
| H  | -2.10992900 | 1.67079600  | -2.17460100 |
| H  | -1.84492100 | 4.17156600  | -1.40302000 |
| N  | -0.79165800 | 1.08948800  | -0.67865900 |
| H  | -0.77328200 | 0.74401200  | 0.28447600  |
| Br | 0.96268300  | 0.31528400  | 2.20055100  |

**Proc6**

0 1

|   |             |             |             |
|---|-------------|-------------|-------------|
| O | 4.32414400  | -1.10217000 | 0.94740100  |
| O | 4.98521200  | -0.34831800 | -0.96754400 |
| N | 0.52047200  | -1.37305600 | -0.32322700 |
| N | 4.09088500  | -0.74307600 | -0.21126300 |
| C | -2.65405200 | -2.44475100 | -0.72359200 |
| C | -3.99817000 | -2.10599900 | -0.87432300 |
| C | -4.58404400 | -1.17913700 | -0.01030200 |
| C | -3.82361200 | -0.60167000 | 1.00696000  |
| C | -2.47597200 | -0.93342900 | 1.15196000  |
| C | -1.88091700 | -1.85724200 | 0.28440000  |
| C | -0.42807300 | -2.23838900 | 0.43119100  |
| C | 1.78456200  | -1.32526200 | 0.09656900  |
| C | 2.76842300  | -0.76759700 | -0.69386300 |
| C | 2.46300400  | -0.39954000 | -2.05138000 |
| C | 1.17423000  | -0.34430600 | -2.42822500 |
| C | 0.08739800  | -0.54035900 | -1.42007000 |
| H | -4.58752800 | -2.56787100 | -1.66079600 |

|    |             |             |             |
|----|-------------|-------------|-------------|
| H  | -5.63198600 | -0.91695800 | -0.12312700 |
| H  | -4.27792000 | 0.11226500  | 1.68809200  |
| H  | -1.87653600 | -0.47640300 | 1.93639100  |
| H  | -0.12456600 | -2.17224300 | 1.47920900  |
| H  | -0.28192800 | -3.26494700 | 0.08266000  |
| H  | 2.01473800  | -1.81238100 | 1.03778000  |
| H  | 3.27129000  | -0.22263800 | -2.75223200 |
| H  | 0.88175100  | -0.13571800 | -3.45092700 |
| H  | -0.79375200 | -0.98647700 | -1.87892600 |
| H  | -2.19928700 | -3.17396700 | -1.39053700 |
| C  | 0.51918300  | 1.97515100  | -0.95970000 |
| C  | -0.05395800 | 3.21698800  | -0.28816900 |
| C  | -1.42182700 | 3.58816500  | -0.85564700 |
| C  | -2.36191200 | 2.38975400  | -0.74437100 |
| C  | -1.77299500 | 1.16730300  | -1.43010900 |
| H  | -1.83442200 | 4.44624900  | -0.31682400 |
| H  | -0.12429300 | 3.03115000  | 0.78946800  |
| H  | 0.66827700  | 4.02645300  | -0.43452200 |
| H  | 0.68744300  | 2.14264300  | -2.02611700 |
| H  | 1.45139200  | 1.66709700  | -0.48405300 |
| H  | -2.54463100 | 2.15135500  | 0.31260000  |
| H  | -3.33399700 | 2.59643600  | -1.20245100 |
| H  | -2.42146100 | 0.29582400  | -1.32090500 |
| H  | -1.59874900 | 1.34782900  | -2.49677300 |
| H  | -1.32414100 | 3.87812700  | -1.91010700 |
| N  | -0.43862300 | 0.81872500  | -0.83848000 |
| H  | -0.52821600 | 0.66894200  | 0.19069800  |
| Br | 0.59362700  | 0.69865400  | 2.30729600  |

**TS<sub>C2</sub>-noBr**

|     |             |             |             |
|-----|-------------|-------------|-------------|
| 1 1 |             |             |             |
| O   | -1.15348700 | -0.70062900 | -2.40507700 |
| O   | -1.63507800 | -2.78929300 | -2.14476700 |
| N   | 0.75238000  | -0.51795800 | 1.12102600  |
| N   | -1.14702800 | -1.73917100 | -1.76104400 |
| C   | 2.87043700  | 1.81031100  | -0.36468200 |
| C   | 4.00307900  | 1.89457200  | -1.17683400 |
| C   | 5.03203800  | 0.96547100  | -1.03638700 |
| C   | 4.93256300  | -0.04753400 | -0.07907700 |
| C   | 3.80534800  | -0.12866800 | 0.73380100  |
| C   | 2.76823200  | 0.79967600  | 0.59233000  |
| C   | 1.54306700  | 0.69179100  | 1.46672000  |
| C   | 0.06363400  | -0.50452200 | -0.04486600 |
| C   | -0.52732300 | -1.70982700 | -0.44906100 |
| C   | -0.58072700 | -2.81497500 | 0.37489000  |
| C   | 0.02744000  | -2.72794200 | 1.62936800  |

|   |             |             |             |
|---|-------------|-------------|-------------|
| C | 0.69876000  | -1.57140100 | 1.96567800  |
| H | 4.07761100  | 2.68431400  | -1.91838700 |
| H | 5.91247100  | 1.02969700  | -1.66882500 |
| H | 5.73528200  | -0.76993900 | 0.03451900  |
| H | 3.72673200  | -0.91429200 | 1.48289400  |
| H | 1.80844900  | 0.60494200  | 2.52118000  |
| H | 0.88537300  | 1.55532900  | 1.33718800  |
| H | 0.26764700  | 0.30097900  | -0.73888700 |
| H | -1.07661900 | -3.72189700 | 0.04525600  |
| H | 0.01020200  | -3.55743300 | 2.32430400  |
| H | 1.23164000  | -1.45902400 | 2.90293800  |
| H | 2.06695200  | 2.53497400  | -0.47175000 |
| C | -1.89997400 | 1.93624400  | -0.36596700 |
| C | -3.11981400 | 2.79235000  | -0.02300000 |
| C | -4.38724800 | 1.93466800  | -0.00419500 |
| C | -4.21376700 | 0.74086100  | 0.93737000  |
| C | -2.95982100 | -0.05595100 | 0.56923300  |
| H | -5.25170500 | 2.53565700  | 0.29704600  |
| H | -2.96939000 | 3.25192800  | 0.96345600  |
| H | -3.20928500 | 3.60568200  | -0.75151800 |
| H | -1.99081700 | 1.54765300  | -1.38827900 |
| H | -0.97779600 | 2.52495700  | -0.31610700 |
| H | -4.11855100 | 1.09626400  | 1.97236000  |
| H | -5.08702300 | 0.08081700  | 0.89841000  |
| H | -2.78825600 | -0.87443100 | 1.27625700  |
| H | -3.09471600 | -0.49842900 | -0.42809900 |
| H | -4.58878200 | 1.56656200  | -1.01971400 |
| N | -1.75563700 | 0.77966600  | 0.52848700  |
| H | -1.54444200 | 1.10655500  | 1.47330400  |

**Proc<sub>2</sub>-noBr**

1 1

|   |             |             |             |
|---|-------------|-------------|-------------|
| O | -1.03029700 | 0.84326200  | 2.36568900  |
| O | -1.28745800 | 2.97588000  | 2.09836200  |
| N | 0.45761500  | 0.39975500  | -1.36275200 |
| N | -1.01476500 | 1.85885100  | 1.65920700  |
| C | 2.95133300  | -1.91210000 | -0.06658400 |
| C | 4.03540100  | -1.93006100 | 0.81282700  |
| C | 4.70803500  | -0.74721400 | 1.11471500  |
| C | 4.29713100  | 0.45382900  | 0.53228500  |
| C | 3.21926600  | 0.47059700  | -0.35018400 |
| C | 2.54185700  | -0.71475800 | -0.65560500 |
| C | 1.38365600  | -0.71071100 | -1.63042900 |
| C | -0.28401400 | 0.33336600  | -0.13128100 |
| C | -0.69094900 | 1.69570100  | 0.29370800  |
| C | -0.76729400 | 2.75169700  | -0.57799100 |



|   |             |             |             |
|---|-------------|-------------|-------------|
| C | -0.34359900 | 2.58826200  | -1.90540000 |
| C | 0.32593900  | 1.42415800  | -2.22185800 |
| H | 4.34671500  | -2.86612500 | 1.26681300  |
| H | 5.54685000  | -0.75810200 | 1.80435500  |
| H | 4.81740800  | 1.37802100  | 0.76599900  |
| H | 2.90207400  | 1.40962200  | -0.79926900 |
| H | 1.73384100  | -0.59324900 | -2.65857000 |
| H | 0.83664800  | -1.65762700 | -1.56961300 |
| H | 0.31699100  | -0.16644200 | 0.63317300  |
| H | -1.12673400 | 3.71133500  | -0.22004800 |
| H | -0.41355200 | 3.38655900  | -2.63087000 |
| H | 0.83855300  | 1.29983500  | -3.17115300 |
| H | 2.42092700  | -2.83338500 | -0.29651500 |
| C | -1.38355900 | -1.84799000 | 0.56504200  |
| C | -2.43268400 | -2.88845400 | 0.21059300  |
| C | -3.83798100 | -2.29121200 | 0.26077800  |
| C | -3.91815000 | -1.06310500 | -0.64441500 |
| C | -2.85771300 | -0.03211700 | -0.28201800 |
| H | -4.57602700 | -3.03596300 | -0.05004300 |
| H | -2.22663700 | -3.28226400 | -0.79339400 |
| H | -2.32917300 | -3.72002100 | 0.91358800  |
| H | -1.51229200 | -1.46302500 | 1.58015100  |
| H | -0.36680200 | -2.23245400 | 0.45420800  |
| H | -3.79049500 | -1.35828400 | -1.69389400 |
| H | -4.89303900 | -0.57413200 | -0.56151700 |
| H | -2.86406200 | 0.81250200  | -0.97276400 |
| H | -2.99264100 | 0.32622100  | 0.74240900  |
| H | -4.07654000 | -2.00262100 | 1.29222400  |
| N | -1.49192300 | -0.65904400 | -0.35068100 |
| H | -1.38651600 | -1.00981200 | -1.31317700 |

**TS<sub>C4</sub>-noBr**

1 1

|   |             |             |             |
|---|-------------|-------------|-------------|
| O | -0.39660000 | 2.82283600  | 0.84480900  |
| O | -1.79661400 | 2.68912200  | -0.79256500 |
| N | 1.08260600  | -0.83373200 | 0.05450200  |
| N | -0.88904500 | 2.24439200  | -0.11142200 |
| C | 4.03222600  | 0.24702500  | 1.36731800  |
| C | 5.24242700  | 0.85596900  | 1.03280600  |
| C | 5.92285400  | 0.46698900  | -0.12006900 |
| C | 5.39523800  | -0.53537200 | -0.93689800 |
| C | 4.18887300  | -1.14569100 | -0.60113500 |
| C | 3.49985100  | -0.75358300 | 0.55152200  |
| C | 2.17648700  | -1.38977000 | 0.89866600  |
| C | 0.59655500  | 0.38066900  | 0.34492800  |

|   |             |             |             |
|---|-------------|-------------|-------------|
| C | -0.37163100 | 0.93139600  | -0.46393300 |
| C | -0.91943400 | 0.24546400  | -1.55697000 |
| C | -0.32242400 | -0.99531600 | -1.86243900 |
| C | 0.64093900  | -1.51557200 | -1.03864400 |
| H | 5.65263600  | 1.63039300  | 1.67390100  |
| H | 6.86503800  | 0.93979400  | -0.38071200 |
| H | 5.92714400  | -0.84503000 | -1.83144200 |
| H | 3.78304500  | -1.93143700 | -1.23429500 |
| H | 2.18692300  | -2.46622300 | 0.72433500  |
| H | 1.90351300  | -1.20126100 | 1.93843500  |
| H | 1.00439800  | 0.89226900  | 1.21046900  |
| H | -1.56833900 | 0.75232200  | -2.25750000 |
| H | -0.63516500 | -1.55889100 | -2.73279100 |
| H | 1.10841300  | -2.47648000 | -1.22063200 |
| H | 3.50233000  | 0.54565600  | 2.26835600  |
| C | -2.67297500 | -0.88457000 | 0.72209500  |
| C | -3.85196400 | -1.58411500 | 1.40344300  |
| C | -5.10704700 | -0.70979600 | 1.33369900  |
| C | -5.39721400 | -0.29087900 | -0.11001300 |
| C | -4.16542400 | 0.37301200  | -0.73039200 |
| H | -5.96513500 | -1.24136200 | 1.75869900  |
| H | -4.03771300 | -2.53997300 | 0.89514500  |
| H | -3.59308900 | -1.81268000 | 2.44327100  |
| H | -2.41222400 | 0.02513300  | 1.28360200  |
| H | -1.78710500 | -1.53231400 | 0.70635600  |
| H | -5.66569100 | -1.17403700 | -0.70580900 |
| H | -6.24595300 | 0.40093800  | -0.15169800 |
| H | -4.33793100 | 0.62950800  | -1.78045700 |
| H | -3.93745400 | 1.30310400  | -0.19441800 |
| H | -4.95210700 | 0.19041900  | 1.94454100  |
| N | -2.97419200 | -0.48053700 | -0.65035200 |
| H | -3.10944100 | -1.31153500 | -1.22831100 |

**ProC4-noBr**

1 1

|   |             |             |             |
|---|-------------|-------------|-------------|
| O | -0.88388000 | 3.03261500  | 1.28307400  |
| O | -2.17134100 | 2.82823500  | -0.43748000 |
| N | 1.01940500  | -0.38720300 | 0.46672800  |
| N | -1.29949000 | 2.39132100  | 0.31556600  |
| C | 3.76057200  | 0.77515500  | 0.09446700  |
| C | 4.97306400  | 1.05257500  | -0.53207100 |
| C | 5.92557200  | 0.04346100  | -0.69300700 |
| C | 5.65773500  | -1.24276300 | -0.22839800 |
| C | 4.43966000  | -1.52113000 | 0.39493000  |
| C | 3.48831300  | -0.51419700 | 0.56479900  |
| C | 2.18094000  | -0.81599700 | 1.26386700  |

|   |             |             |             |
|---|-------------|-------------|-------------|
| C | 0.30213300  | 0.69090100  | 0.80215300  |
| C | -0.75415500 | 1.11226100  | 0.03260000  |
| C | -1.28811100 | 0.31703700  | -1.10612200 |
| C | -0.23204400 | -0.64715100 | -1.55826700 |
| C | 0.79915200  | -0.98809200 | -0.77402400 |
| H | 5.17678600  | 2.05629700  | -0.89323800 |
| H | 6.87059400  | 0.26065100  | -1.18205600 |
| H | 6.39206700  | -2.03281900 | -0.35491900 |
| H | 4.22728600  | -2.52643700 | 0.75048300  |
| H | 2.08560100  | -1.88819800 | 1.45273900  |
| H | 2.11725000  | -0.29617900 | 2.22262300  |
| H | 0.61161400  | 1.24240900  | 1.68350100  |
| H | -1.62802900 | 0.95293100  | -1.92669800 |
| H | -0.32946600 | -1.09715200 | -2.54009200 |
| H | 1.54360900  | -1.71984200 | -1.06875500 |
| H | 3.02258100  | 1.56558300  | 0.21651000  |
| C | -2.40195700 | -1.32631300 | 0.51206500  |
| C | -3.59918100 | -2.25321700 | 0.67604600  |
| C | -4.90950100 | -1.46803100 | 0.70967100  |
| C | -5.02383600 | -0.58328300 | -0.53096700 |
| C | -3.81271500 | 0.32721500  | -0.66974800 |
| H | -5.75920700 | -2.15444600 | 0.76459200  |
| H | -3.61237000 | -2.97467400 | -0.15111300 |
| H | -3.45506500 | -2.82154200 | 1.59946400  |
| H | -2.32545900 | -0.62371100 | 1.34659100  |
| H | -1.47103200 | -1.88911200 | 0.41959300  |
| H | -5.11383200 | -1.20509200 | -1.43118600 |
| H | -5.91384600 | 0.05090900  | -0.48433600 |
| H | -3.84801900 | 0.92756500  | -1.58040600 |
| H | -3.71512900 | 0.98964900  | 0.19345000  |
| H | -4.93631500 | -0.84030400 | 1.60953600  |
| N | -2.55631500 | -0.49822400 | -0.73134200 |
| H | -2.67689300 | -1.15513100 | -1.51565600 |

**TS<sub>C6</sub>-noBr**

1 1

|   |             |             |             |
|---|-------------|-------------|-------------|
| O | -4.36355300 | -1.08703100 | -1.53994300 |
| O | -5.06993800 | 0.52620700  | -0.29384800 |
| N | -0.90454500 | -1.33253500 | 0.51149700  |
| N | -4.22780800 | -0.29306100 | -0.62162800 |
| C | 2.44918900  | -2.32760300 | 0.89893500  |
| C | 3.76459900  | -2.00022400 | 0.56336200  |
| C | 4.04855700  | -1.45604900 | -0.68760600 |
| C | 3.01926600  | -1.25676100 | -1.61230000 |
| C | 1.71087100  | -1.60203500 | -1.28349600 |
| C | 1.41700500  | -2.12498800 | -0.01932600 |

|   |             |             |             |
|---|-------------|-------------|-------------|
| C | 0.00324000  | -2.50378600 | 0.33957300  |
| C | -2.06454600 | -1.29243700 | -0.17054100 |
| C | -2.98409400 | -0.31719700 | 0.12956300  |
| C | -2.77461300 | 0.58853500  | 1.18462700  |
| C | -1.56774300 | 0.54457100  | 1.83381700  |
| C | -0.57165900 | -0.34827900 | 1.39069900  |
| H | 4.56212200  | -2.16357700 | 1.28186100  |
| H | 5.06952300  | -1.19258900 | -0.94769200 |
| H | 3.23965300  | -0.84200700 | -2.59154000 |
| H | 0.90992500  | -1.46154300 | -2.00748100 |
| H | -0.44685400 | -3.12266300 | -0.43769000 |
| H | -0.02276800 | -3.05403600 | 1.28282000  |
| H | -2.24241300 | -2.06622900 | -0.90784000 |
| H | -3.55354500 | 1.28694100  | 1.46940400  |
| H | -1.34025000 | 1.21417400  | 2.65415200  |
| H | 0.34363000  | -0.50583200 | 1.94980100  |
| H | 2.22365000  | -2.74600500 | 1.87680200  |
| C | -0.11710800 | 2.34419300  | -0.15514600 |
| C | 0.68978700  | 3.39436200  | -0.92295400 |
| C | 2.00973700  | 3.69007400  | -0.20777900 |
| C | 2.78814300  | 2.39485000  | 0.03187300  |
| C | 1.92040200  | 1.37451800  | 0.77013800  |
| H | 2.61030100  | 4.39569100  | -0.79138400 |
| H | 0.89432200  | 3.01676800  | -1.93388600 |
| H | 0.08935400  | 4.30444000  | -1.02996100 |
| H | -0.41680500 | 2.75192900  | 0.82008000  |
| H | -1.03182400 | 2.07933000  | -0.69596000 |
| H | 3.09730800  | 1.96534000  | -0.93142900 |
| H | 3.69905900  | 2.58503600  | 0.61043900  |
| H | 2.44509000  | 0.42068800  | 0.88241900  |
| H | 1.68331600  | 1.74651200  | 1.77738300  |
| H | 1.79854500  | 4.16935100  | 0.75836200  |
| N | 0.64576200  | 1.11936000  | 0.09185800  |
| H | 0.81653100  | 0.63806300  | -0.79104000 |

**Proc6-noBr**

1 1

|   |             |             |             |
|---|-------------|-------------|-------------|
| O | -4.06191200 | -1.54545900 | -1.36590400 |
| O | -4.95157900 | 0.28873800  | -0.65177800 |
| N | -0.76753600 | -0.97523800 | 0.87302700  |
| N | -4.02148200 | -0.51801900 | -0.68386400 |
| C | 2.64616100  | -1.60549400 | 1.21080800  |
| C | 3.86148500  | -1.38774800 | 0.55654500  |
| C | 3.93234800  | -1.48267800 | -0.83230300 |
| C | 2.78975900  | -1.80566900 | -1.56946300 |
| C | 1.57834700  | -2.02279400 | -0.91767200 |
| C | 1.49773500  | -1.91573900 | 0.47630100  |

|   |             |             |             |
|---|-------------|-------------|-------------|
| C | 0.16276400  | -2.08478000 | 1.16557100  |
| C | -1.88204700 | -1.19251000 | 0.16522300  |
| C | -2.86747500 | -0.23851600 | 0.08589700  |
| C | -2.79788600 | 0.93094000  | 0.92289800  |
| C | -1.66681300 | 1.18036400  | 1.60301700  |
| C | -0.44946300 | 0.33433800  | 1.40304800  |
| H | 4.74897600  | -1.14431500 | 1.13302400  |
| H | 4.87587600  | -1.31111500 | -1.34178500 |
| H | 2.84471600  | -1.88750500 | -2.65093500 |
| H | 0.68649200  | -2.27054000 | -1.49004100 |
| H | -0.32882300 | -3.00482400 | 0.84371700  |
| H | 0.29341700  | -2.12642500 | 2.25095400  |
| H | -1.99236300 | -2.16864400 | -0.29575000 |
| H | -3.67798100 | 1.55277400  | 1.04275300  |
| H | -1.60089000 | 1.99277400  | 2.31713700  |
| H | 0.11944100  | 0.20573700  | 2.32873500  |
| H | 2.58678500  | -1.52768200 | 2.29395200  |
| C | 0.09612200  | 1.25623000  | -0.94025000 |
| C | 1.23755600  | 1.81595800  | -1.77969800 |
| C | 1.78924100  | 3.11117500  | -1.18613000 |
| C | 2.20302700  | 2.88905600  | 0.26790000  |
| C | 1.04493200  | 2.33277500  | 1.08244200  |
| H | 2.64372600  | 3.45943300  | -1.77311300 |
| H | 2.03442500  | 1.06270600  | -1.84460800 |
| H | 0.85828400  | 1.97416600  | -2.79333800 |
| H | -0.74905300 | 1.94827200  | -0.89012900 |
| H | -0.23980600 | 0.29181000  | -1.32572600 |
| H | 3.04800800  | 2.18933600  | 0.31904900  |
| H | 2.52422600  | 3.82345700  | 0.73683900  |
| H | 1.33178500  | 2.11286100  | 2.11345700  |
| H | 0.19345200  | 3.01833400  | 1.07959500  |
| H | 1.01956200  | 3.89213200  | -1.23052100 |
| N | 0.56708800  | 1.04480500  | 0.46953200  |
| H | 1.38643800  | 0.42075100  | 0.42251400  |

### 3. Experimental data for the formation of 3

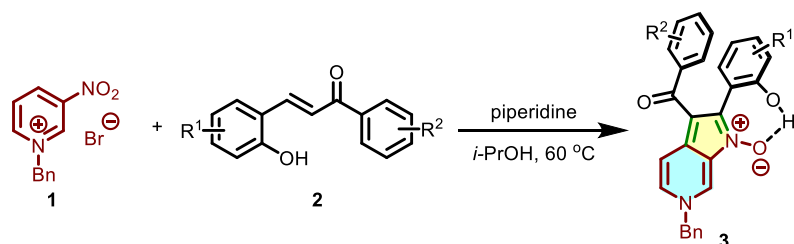

**General procedure:** To a 5.0 mL vial were successively added pyridinium salts **1** (0.2 mmol), *ortho*-hydroxychalcones **2** (0.70 mmol, 3.5 equiv.) and 1.0 mL of *i*-PrOH. And then, piperidine (149.0 mg, 1.75 mmol) was added by syringe. The resulting mixture was stirred at 60 °C, and then the reaction mixture was directly subjected to flash column chromatography on silica gel (petroleum ether/ ethyl acetate or dichloromethane/methanol) to afford the corresponding products **3**.

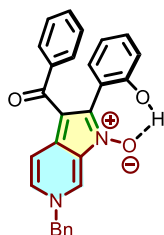

3-Benzoyl-6-benzyl-2-(2-hydroxyphenyl)-6*H*-pyrrolo[2,3-*c*]pyridine 1-oxide (**3a**)

Yellow solid obtained by column chromatography (petroleum ether/ethyl acetate = 1:1 to 1:10); 69.1 mg, 82% yield; reaction time = 24 h; mp 147.3-148.0 °C; <sup>1</sup>H NMR (300 MHz, CDCl<sub>3</sub>) δ 13.59 (br, 1H), 9.14 (s, 1H), 7.95 (d, *J* = 6.0 Hz, 1H), 7.56 (d, *J* = 6.0 Hz, 1H), 7.49 (d, *J* = 6.0 Hz, 2H), 7.36-7.29 (m, 4H), 7.21-7.12 (m, 5H), 6.96 (d, *J* = 6.0 Hz, 1H), 6.84 (d, *J* = 6.0 Hz, 1H), 6.36 (t, *J* = 6.0 Hz, 1H), 5.40 (s, 2H); <sup>13</sup>C NMR (75 MHz, CDCl<sub>3</sub>) δ 190.7, 159.5, 151.4, 138.6, 133.9, 133.5, 132.1, 131.7, 130.6, 130.4, 130.0, 129.5, 129.5, 129.2, 128.4, 128.1, 127.9, 119.9, 118.4, 117.1, 116.5, 108.0, 63.2. IR (KBr) ν 3413, 1622, 1454, 748 cm<sup>-1</sup>. HRMS (ESI) calcd for C<sub>27</sub>H<sub>21</sub>N<sub>2</sub>O<sub>3</sub> [M+H]<sup>+</sup>: 421.1547, found: 421.1571.

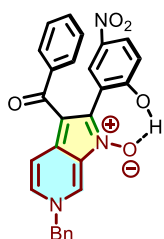

3-Benzoyl-6-benzyl-2-(2-hydroxy-5-nitrophenyl)-6*H*-pyrrolo[2,3-*c*]pyridine 1-oxide (**3b**)

Yellow solid obtained by column chromatography (dichloromethane/methanol = 120:1 to 80:1); 39.2 mg, 42% yield; reaction time = 72 h; mp 280.9-281.6 °C; <sup>1</sup>H NMR (300 MHz, DMSO-*d*<sub>6</sub>) δ 9.72 (s, 1H), 8.41 (d, *J* = 6.0 Hz, 1H), 8.02 (d, *J* = 6.0 Hz, 1H), 7.95 (dd, *J*<sub>1</sub> = 9.0 Hz, *J*<sub>2</sub> = 3.0 Hz, 1H), 7.75 (d, *J* = 3.0 Hz, 1H), 7.55 (d, *J* = 6.0 Hz, 2H), 7.43-7.41 (m, 5H), 7.34 (d, *J* = 6.0 Hz, 1H), 7.19 (t, *J* = 6.0 Hz, 2H), 6.87 (d, *J* = 9.0 Hz, 1H), 5.83 (s, 2H), the proton of phenolic hydroxyl

group was missing;  $^{13}\text{C}$  NMR (75 MHz,  $\text{DMSO-}d_6$ )  $\delta$  189.8, 168.4, 147.8, 138.5, 136.9, 135.6, 133.2, 131.8, 130.6, 130.4, 130.0, 129.2, 129.0, 128.9, 128.7, 128.5, 128.0, 127.1, 120.6, 116.8, 116.4, 107.4, 62.0. IR (KBr)  $\nu$  3424, 3042, 1624, 1486, 1333, 749  $\text{cm}^{-1}$ . HRMS (ESI) calcd for  $\text{C}_{27}\text{H}_{20}\text{N}_3\text{O}_5$   $[\text{M}+\text{H}]^+$ : 466.1397, found: 466.1395.

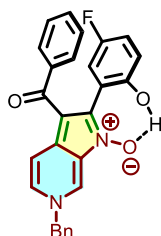

3-Benzoyl-6-benzyl-2-(5-fluoro-2-hydroxyphenyl)-6H-pyrrolo[2,3-c]pyridine 1-oxide (**3c**)

Yellow solid obtained by column chromatography (dichloromethane/methanol = 120:1 to 70:1); 68.9 mg, 79% yield; reaction time = 72 h; mp 208.7-209.4  $^{\circ}\text{C}$ ;  $^1\text{H}$  NMR (300 MHz,  $\text{DMSO-}d_6$ )  $\delta$  13.72 (s, 1H), 9.62 (s, 1H), 8.29 (d,  $J$  = 6.0 Hz, 1H), 7.78 (d,  $J$  = 9.0 Hz, 1H), 7.53-7.37 (m, 8H), 7.28 (t,  $J$  = 6.0 Hz, 2H), 7.06-6.99 (m, 1H), 6.83 (dd,  $J_1$  = 9.0 Hz,  $J_2$  = 6.0 Hz, 1H), 6.70 (dd,  $J_1$  = 12.0 Hz,  $J_2$  = 6.0 Hz, 1H), 5.78 (s, 2H);  $^{13}\text{C}$  NMR (75 MHz,  $\text{DMSO-}d_6$ )  $\delta$  189.3, 155.9, 154.2 (d,  $J$  = 232.5 Hz, 1C), 148.3 (d,  $J$  = 2.3 Hz, 1C), 139.2, 135.7, 132.6, 131.8, 129.9, 129.7, 129.5, 129.2, 128.9, 128.8, 128.4, 128.1, 120.5 (d,  $J$  = 8.3 Hz, 1C), 118.7 (d,  $J$  = 2.3 Hz, 1C), 118.4 (d,  $J$  = 3.0 Hz, 1C), 117.9 (d,  $J$  = 8.3 Hz, 1C), 116.2, 106.8, 61.7;  $^{19}\text{F}$  NMR (376 MHz,  $\text{DMSO-}d_6$ )  $\delta$  -127.4. IR (KBr)  $\nu$  3427, 3048, 1627, 1464, 1133  $\text{cm}^{-1}$ . HRMS (ESI) calcd for  $\text{C}_{27}\text{H}_{20}\text{FN}_2\text{O}_3$   $[\text{M}+\text{H}]^+$ : 439.1452, found: 439.1452.

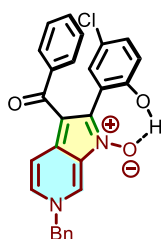

3-Benzoyl-6-benzyl-2-(5-chloro-2-hydroxyphenyl)-6H-pyrrolo[2,3-c]pyridine 1-oxide (**3d**)

Yellow solid obtained by column chromatography (dichloromethane/methanol = 150:1 to 80:1); 56.4 mg, 62% yield; reaction time = 72 h; mp 234.7-235.8  $^{\circ}\text{C}$ ;  $^1\text{H}$  NMR (400 MHz,  $\text{DMSO-}d_6$ )  $\delta$  14.26 (s, 1H), 9.62 (s, 1H), 8.30 (d,  $J$  = 8.0 Hz, 1H), 7.82 (d,  $J$  = 8.0 Hz, 1H), 7.53-7.40 (m, 8H), 7.28 (t,  $J$  = 8.0 Hz, 2H), 7.16 (d,  $J$  = 8.0 Hz, 1H), 6.89 (s, 1H), 6.83 (d,  $J$  = 8.0 Hz, 1H), 5.78 (s, 2H);  $^{13}\text{C}$  NMR (100 MHz,  $\text{DMSO-}d_6$ )  $\delta$  189.4, 158.8, 148.1, 139.1, 135.6, 132.6, 132.4, 131.8,

131.2, 129.9, 129.8, 129.4, 129.1, 128.9, 128.6, 128.4, 128.1, 121.2, 121.2, 118.6, 116.2, 106.8, 61.7. IR (KBr)  $\nu$  3046, 1622, 1450, 1129  $\text{cm}^{-1}$ . HRMS (ESI) calcd for  $\text{C}_{27}\text{H}_{20}\text{ClN}_2\text{O}_3$   $[\text{M}+\text{H}]^+$ : 455.1157, found: 455.1157.

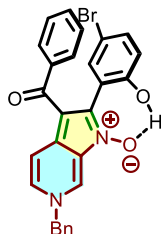

3-Benzoyl-6-benzyl-2-(5-bromo-2-hydroxyphenyl)-6H-pyrrolo[2,3-c]pyridine 1-oxide (**3e**)

Yellow solid obtained by column chromatography (dichloromethane/methanol = 120:1 to 80:1); 55.7 mg, 56% yield; reaction time = 72 h; mp 229.8-231.3  $^{\circ}\text{C}$ ;  $^1\text{H}$  NMR (300 MHz,  $\text{DMSO}-d_6$ )  $\delta$  14.32 (br, 1H), 9.63 (s, 1H), 8.31 (d,  $J = 6.0$  Hz, 1H), 7.85 (d,  $J = 6.0$  Hz, 1H), 7.52 (d,  $J = 6.0$  Hz, 2H), 7.46-7.40 (m, 6H), 7.30-7.25 (m, 3H), 6.99 (d,  $J = 3.0$  Hz, 1H), 6.77 (d,  $J = 9.0$  Hz, 1H), 5.78 (s, 2H);  $^{13}\text{C}$  NMR (75 MHz,  $\text{DMSO}-d_6$ )  $\delta$  189.6, 159.2, 148.1, 139.1, 135.7, 135.4, 134.1, 132.8, 131.9, 129.9, 129.9, 129.4, 129.2, 129.0, 128.7, 128.5, 128.2, 121.7, 119.2, 116.3, 108.7, 106.9, 61.8. IR (KBr)  $\nu$  3429, 3030, 1623, 1451, 746  $\text{cm}^{-1}$ . HRMS (ESI) calcd for  $\text{C}_{27}\text{H}_{20}\text{BrN}_2\text{O}_3$   $[\text{M}+\text{H}]^+$ : 499.0652, found: 499.0651.

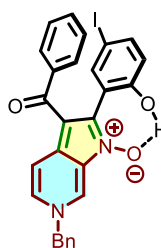

3-Benzoyl-6-benzyl-2-(2-hydroxy-5-iodophenyl)-6H-pyrrolo[2,3-c]pyridine 1-oxide (**3f**)

Yellow solid obtained by column chromatography (dichloromethane/methanol = 120:1 to 80:1); 65.9 mg, 60% yield; reaction time = 72 h; mp 115.8-116.4  $^{\circ}\text{C}$ ;  $^1\text{H}$  NMR (400 MHz,  $\text{CDCl}_3$ )  $\delta$  13.86 (br, 1H), 9.19 (s, 1H), 8.26 (d,  $J = 4.0$  Hz, 1H), 7.71 (d,  $J = 8.0$  Hz, 1H), 7.48 (d,  $J = 8.0$  Hz, 2H), 7.43-7.42 (m, 3H), 7.33 (d,  $J = 8.0$  Hz, 2H), 7.28-7.20 (m, 4H), 7.05 (s, 1H), 6.72 (d,  $J = 8.0$  Hz, 1H), 5.53 (s, 2H);  $^{13}\text{C}$  NMR (100 MHz,  $\text{CDCl}_3$ )  $\delta$  190.9, 159.7, 149.9, 142.2, 140.4, 138.5, 133.2, 131.8, 130.9, 130.6, 130.1, 129.8, 129.7, 128.9, 128.6, 128.2, 128.1, 122.1, 119.4, 117.2, 108.3, 79.3, 63.5. IR (KBr)  $\nu$  3423, 2931, 1626, 1451  $\text{cm}^{-1}$ . HRMS (ESI) calcd for  $\text{C}_{27}\text{H}_{20}\text{IN}_2\text{O}_3$   $[\text{M}+\text{H}]^+$ : 547.0513, found: 547.0524.



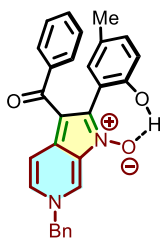

3-Benzoyl-6-benzyl-2-(2-hydroxy-5-methylphenyl)-6H-pyrrolo[2,3-c]pyridine 1-oxide (**3g**)

Yellow solid obtained by column chromatography (dichloromethane/methanol = 120:1 to 90:1); 35.3 mg, 41% yield; reaction time = 72 h; mp 233.7-234.8 °C;  $^1\text{H}$  NMR (300 MHz,  $\text{CDCl}_3$ )  $\delta$  13.30 (s, 1H), 9.27 (s, 1H), 8.14 (d,  $J = 6.0$  Hz, 1H), 7.64 (d,  $J = 9.0$  Hz, 1H), 7.49 (d,  $J = 6.0$  Hz, 2H), 7.39-7.37 (m, 3H), 7.32-7.22 (m, 3H), 7.16 (t,  $J = 9.0$  Hz, 2H), 6.93 (dd,  $J_1 = 9.0$  Hz,  $J_2 = 3.0$  Hz, 1H), 7.87 (d,  $J = 6.0$  Hz, 1H), 6.59 (s, 1H), 5.49 (s, 2H), 1.85 (s, 3H);  $^{13}\text{C}$  NMR (75 MHz,  $\text{CDCl}_3$ )  $\delta$  191.0, 157.2, 151.5, 138.8, 134.2, 133.5, 132.8, 131.4, 130.8, 130.4, 130.2, 129.5, 129.4, 128.9, 128.4, 128.1, 127.7, 127.5, 119.5, 116.6, 108.0, 63.2, 19.8, one carbon missing in the aromatic region. IR (KBr)  $\nu$  3424, 3044, 1626, 1461, 1230  $\text{cm}^{-1}$ . HRMS (ESI) calcd for  $\text{C}_{28}\text{H}_{23}\text{N}_2\text{O}_3$   $[\text{M}+\text{H}]^+$ : 435.1703, found: 435.1702.

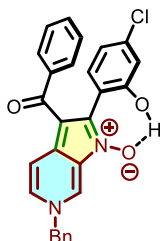

3-Benzoyl-6-benzyl-2-(4-chloro-2-hydroxyphenyl)-6H-pyrrolo[2,3-c]pyridine 1-oxide (**3h**)

Yellow solid obtained by column chromatography (dichloromethane/methanol = 120:1 to 50:1); 61.6 mg, 68% yield; reaction time = 72 h; mp 205.7-206.9 °C;  $^1\text{H}$  NMR (300 MHz,  $\text{DMSO}-d_6$ )  $\delta$  14.88 (br, 1H), 9.62 (s, 1H), 8.28 (d,  $J = 9.0$  Hz, 1H), 7.73 (d,  $J = 6.0$  Hz, 1H), 7.53-7.37 (m, 8H), 7.29 (t,  $J = 6.0$  Hz, 2H), 6.93 (d,  $J = 9.0$  Hz, 1H), 6.88 (d,  $J = 6.0$  Hz, 1H), 6.44 (dd,  $J_1 = 6.0$  Hz,  $J_2 = 3.0$  Hz, 1H), 5.78 (s, 2H);  $^{13}\text{C}$  NMR (100 MHz,  $\text{DMSO}-d_6$ )  $\delta$  189.4, 161.0, 148.7, 139.0, 136.2, 135.6, 134.6, 132.5, 131.9, 129.8, 129.6, 129.2, 129.1, 128.9, 128.3, 128.1, 119.2, 117.6, 116.3, 115.9, 106.8, 61.7, one carbon missing in the aromatic region. IR (KBr)  $\nu$  3424, 1625, 1401, 1225  $\text{cm}^{-1}$ . HRMS (ESI) calcd for  $\text{C}_{27}\text{H}_{20}\text{ClN}_2\text{O}_3$   $[\text{M}+\text{H}]^+$ : 455.1157, found: 455.1182.

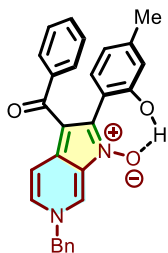

3-Benzoyl-6-benzyl-2-(2-hydroxy-4-methylphenyl)-6*H*-pyrrolo[2,3-*c*]pyridine 1-oxide (**3i**)

Yellow solid obtained by column chromatography (dichloromethane/methanol = 120:1 to 50:1); 56.5 mg, 65% yield; reaction time = 72 h; mp 169.0-169.7 °C; <sup>1</sup>H NMR (400 MHz, CDCl<sub>3</sub>) δ 13.56 (br, 1H), 8.98 (s, 1H), 8.03 (d, *J* = 8.0 Hz, 1H), 7.61 (d, *J* = 8.0 Hz, 1H), 7.53 (d, *J* = 4.0 Hz, 2H), 7.44-7.42 (m, 3H), 7.33 (t, *J* = 8.0 Hz, 1H), 7.28-7.27 (m, 2H), 7.18 (t, *J* = 8.0 Hz, 2H), 6.82 (s, 1H), 6.75 (d, *J* = 8.0 Hz, 1H), 6.20 (d, *J* = 8.0 Hz, 1H), 5.47 (s, 2H), 2.20 (s, 3H); <sup>13</sup>C NMR (100 MHz, CDCl<sub>3</sub>) δ 190.6, 159.5, 151.5, 142.8, 138.8, 133.6, 131.6, 130.5, 130.3, 130.0, 129.4, 129.4, 129.3, 128.1, 127.9, 120.3, 119.6, 116.1, 114.2, 107.8, 63.1, 21.3, two carbons missing in the aromatic region. IR (KBr) ν 3423, 2379, 1624, 1484 cm<sup>-1</sup>. HRMS (ESI) calcd for C<sub>28</sub>H<sub>23</sub>N<sub>2</sub>O<sub>3</sub> [M+H]<sup>+</sup>: 435.1703, found: 435.1716.

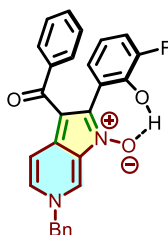

3-Benzoyl-6-benzyl-2-(3-fluoro-2-hydroxyphenyl)-6*H*-pyrrolo[2,3-*c*]pyridine 1-oxide (**3j**)

Yellow solid obtained by column chromatography (dichloromethane/methanol = 150:1 to 50:1); 45.6 mg, 52% yield; reaction time = 72 h; mp 254.9-255.6 °C; <sup>1</sup>H NMR (300 MHz, DMSO-*d*<sub>6</sub>) δ 14.87 (br, 1H), 9.66 (s, 1H), 8.31 (d, *J* = 6.0 Hz, 1H), 7.81 (d, *J* = 6.0 Hz, 1H), 7.54-7.35 (m, 8H), 7.27 (t, *J* = 6.0 Hz, 2H), 7.09 (t, *J* = 9.0 Hz, 1H), 6.72 (d, *J* = 6.0 Hz, 1H), 6.37-6.30 (m, 1H), 5.79 (s, 2H); <sup>13</sup>C NMR (100 MHz, DMSO-*d*<sub>6</sub>) δ 189.4, 153.3 (d, *J* = 238.0 Hz, 1C), 148.8, 148.8, 148.6, 138.9, 135.6, 132.6, 132.0, 129.8, 129.2, 129.1, 128.9, 128.8 (d, *J* = 3.0 Hz, 1C), 128.4, 128.1, 119.7 (d, *J* = 3.0 Hz, 1C), 117.2, 117.0, 117.0, 116.1, 106.8, 61.7; <sup>19</sup>F NMR (376 MHz, DMSO-*d*<sub>6</sub>) δ -135.5. IR (KBr) ν 3406, 3070, 1632, 1479, 1402, 1114 cm<sup>-1</sup>. HRMS (ESI) calcd for C<sub>27</sub>H<sub>20</sub>FN<sub>2</sub>O<sub>3</sub> [M+H]<sup>+</sup>: 439.1452, found: 439.1440.

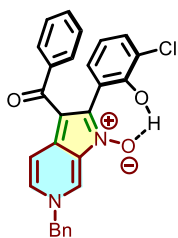

3-Benzoyl-6-benzyl-2-(3-chloro-2-hydroxyphenyl)-6H-pyrrolo[2,3-c]pyridine 1-oxide (**3k**)

Yellow solid obtained by column chromatography (dichloromethane/methanol = 150:1 to 90:1); 38.2 mg, 42% yield; reaction time = 72 h; mp 275.9-276.6 °C; <sup>1</sup>H NMR (300 MHz, DMSO-*d*<sub>6</sub>) δ 9.68 (s, 1H), 8.31 (d, *J* = 6.0 Hz, 1H), 7.79 (d, *J* = 6.0 Hz, 1H), 7.54-7.25 (m, 11H), 6.89 (d, *J* = 6.0 Hz, 1H), 6.36 (t, *J* = 6.0 Hz, 1H), 5.79 (s, 2H), the proton of phenolic hydroxyl group was missing; <sup>13</sup>C NMR (100 MHz, DMSO-*d*<sub>6</sub>) δ 189.5, 156.0, 148.9, 138.9, 135.7, 132.6, 132.5, 132.0, 131.4, 129.8, 129.1, 129.1, 128.9, 128.4, 128.1, 128.0, 127.6, 123.5, 118.8, 117.7, 116.1, 107.0, 61.7. IR (KBr) ν 3421, 3075, 1609, 1406, 1223, 741 cm<sup>-1</sup>. HRMS (ESI) calcd for C<sub>27</sub>H<sub>20</sub>ClN<sub>2</sub>O<sub>3</sub> [M+H]<sup>+</sup>: 455.1157, found: 455.1145.

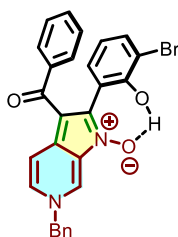

3-Benzoyl-6-benzyl-2-(3-bromo-2-hydroxyphenyl)-6H-pyrrolo[2,3-c]pyridine 1-oxide (**3l**)

Yellow solid obtained by column chromatography (dichloromethane/methanol = 150:1 to 50:1); 40.0 mg, 40% yield; reaction time = 72 h; mp 274.6-275.5 °C; <sup>1</sup>H NMR (300 MHz, DMSO-*d*<sub>6</sub>) δ 9.67 (s, 1H), 8.31 (d, *J* = 6.0 Hz, 1H), 7.78 (d, *J* = 6.0 Hz, 1H), 7.54-7.36 (m, 9H), 7.28 (t, *J* = 6.0 Hz, 2H), 6.93 (d, *J* = 9.0 Hz, 1H), 6.31 (t, *J* = 9.0 Hz, 1H), 5.79 (s, 2H), the proton of phenolic hydroxyl group was missing; <sup>13</sup>C NMR (75 MHz, DMSO-*d*<sub>6</sub>) δ 189.5, 156.7, 148.9, 138.9, 135.7, 134.6, 133.3, 132.7, 132.1, 129.8, 129.1, 129.1, 128.9, 128.4, 128.2, 118.5, 118.3, 116.1, 113.9, 107.0, 61.7, two carbons missing in the aromatic region. IR (KBr) ν 3072, 1623, 1404, 1325, 739 cm<sup>-1</sup>. HRMS (ESI) calcd for C<sub>27</sub>H<sub>20</sub>BrN<sub>2</sub>O<sub>3</sub> [M+H]<sup>+</sup>: 499.0652, found: 499.0651.

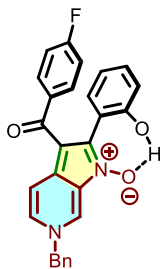

6-Benzyl-3-(4-fluorobenzoyl)-2-(2-hydroxyphenyl)-6*H*-pyrrolo[2,3-*c*]pyridine 1-oxide (**3m**)

Yellow solid obtained by column chromatography (petroleum ether/ethyl acetate = 1:1 to 1:5); 50.4 mg, 58% yield; reaction time = 20 h; mp 266.1-266.8 °C; <sup>1</sup>H NMR (300 MHz, CDCl<sub>3</sub>) δ 13.54 (s, 1H), 9.10 (s, 1H), 8.13 (d, *J* = 9.0 Hz, 1H), 7.64 (dd, *J*<sub>1</sub> = 6.0 Hz, *J*<sub>2</sub> = 3.0 Hz, 1H), 7.52-7.47 (m, 2H), 7.41-7.39 (m, 3H), 7.25-7.14 (m, 2H), 7.17 (t, *J* = 9.0 Hz, 1H), 6.98 (d, *J* = 9.0 Hz, 1H), 6.82-6.77 (m, 3H), 6.38 (t, *J* = 6.0 Hz, 1H), 5.46 (s, 2H); <sup>13</sup>C NMR (75 MHz, CDCl<sub>3</sub>) δ 189.3, 164.7 (d, *J* = 252.0 Hz, 1C), 159.6, 151.5, 134.7 (d, *J* = 3.0 Hz, 1C), 133.9, 133.3, 132.3, 131.8, 131.7, 130.8, 130.3, 130.3, 129.8, 129.6, 128.2, 128.1, 120.1, 118.5, 116.9 (d, *J* = 19.5 Hz, 1C), 114.9 (d, *J* = 20.9 Hz, 1C), 108.0, 63.5; <sup>19</sup>F NMR (376 MHz, CDCl<sub>3</sub>) δ -106.78 to -106.85 (m, 1F). IR (KBr) ν 3410, 2922, 1600, 1454, 759 cm<sup>-1</sup>. HRMS (ESI) calcd for C<sub>27</sub>H<sub>20</sub>FN<sub>2</sub>O<sub>3</sub> [M+H]<sup>+</sup>: 439.1452, found: 439.1453.

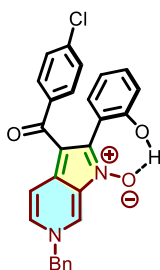

6-Benzyl-3-(4-chlorobenzoyl)-2-(2-hydroxyphenyl)-6*H*-pyrrolo[2,3-*c*]pyridine 1-oxide (**3n**)

Yellow solid obtained by column chromatography (dichloromethane/methanol = 150:1 to 70:1); 68.6 mg, 75% yield; reaction time = 24 h; mp 263.4-264.1 °C; <sup>1</sup>H NMR (300 MHz, DMSO-*d*<sub>6</sub>) δ 13.93 (s, 1H), 9.59 (s, 1H), 8.30 (d, *J* = 6.0 Hz, 1H), 7.86 (d, *J* = 6.0 Hz, 1H), 7.52 (d, *J* = 6.0 Hz, 2H), 7.46-7.36 (m, 5H), 7.29 (d, *J* = 9.0 Hz, 2H), 7.19 (t, *J* = 6.0 Hz, 1H), 6.87 (d, *J* = 6.0 Hz, 2H), 6.41 (t, *J* = 6.0 Hz, 1H), 5.78 (s, 2H); <sup>13</sup>C NMR (75 MHz, DMSO-*d*<sub>6</sub>) δ 188.1, 159.7, 149.7, 137.8, 136.4, 135.7, 133.7, 132.6, 131.7, 130.6, 129.8, 129.6, 129.5, 129.1, 128.9, 128.3, 128.0, 119.5, 117.8, 117.2, 115.9, 106.4, 61.6. IR (KBr) ν 3422, 2378, 1622, 1456, 762 cm<sup>-1</sup>. HRMS (ESI) calcd for C<sub>27</sub>H<sub>20</sub>ClN<sub>2</sub>O<sub>3</sub> [M+H]<sup>+</sup>: 455.1157, found: 455.1157.

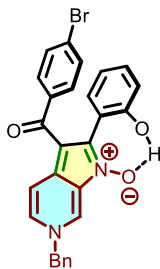

6-Benzyl-3-(4-bromobenzoyl)-2-(2-hydroxyphenyl)-6H-pyrrolo[2,3-c]pyridine 1-oxide (**3o**)

Yellow solid obtained by column chromatography (petroleum ether/ethyl acetate = 1:1 to 1:5); 64.1 mg, 64% yield; reaction time = 20 h; mp 249.2-250.1 °C; <sup>1</sup>H NMR (300 MHz, CDCl<sub>3</sub>) δ 13.47 (br, 1H), 9.10 (s, 1H), 8.11 (d, *J* = 6.0 Hz, 1H), 7.64 (d, *J* = 6.0 Hz, 1H), 7.40-7.39 (m, 3H), 7.34 (d, *J* = 9.0 Hz, 2H), 7.24-7.16 (m, 5H), 6.98 (d, *J* = 9.0 Hz, 1H), 6.78 (d, *J* = 6.0 Hz, 1H), 6.38 (t, *J* = 6.0 Hz, 1H), 5.46 (s, 2H); <sup>13</sup>C NMR (75 MHz, CDCl<sub>3</sub>) δ 189.5, 159.6, 151.5, 137.4, 133.9, 133.2, 132.3, 131.1, 130.9, 130.8, 130.5, 130.3, 129.8, 129.6, 128.3, 128.1, 126.5, 120.1, 118.5, 116.9, 116.8, 107.9, 63.5. IR (KBr) ν 3400, 3081, 1597, 1455, 759 cm<sup>-1</sup>. HRMS (ESI) calcd for C<sub>27</sub>H<sub>20</sub>BrN<sub>2</sub>O<sub>3</sub> [M+H]<sup>+</sup>: 499.0652, found: 499.0652.

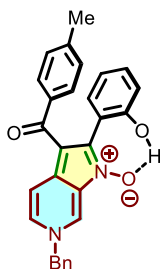

6-Benzyl-2-(2-hydroxyphenyl)-3-(4-methylbenzoyl)-6H-pyrrolo[2,3-c]pyridine 1-oxide (**3p**)

Yellow solid obtained by column chromatography (dichloromethane/methanol = 200:1 to 50:1); 44.2 mg, 51% yield; reaction time = 46 h; mp 210.7-211.8 °C; <sup>1</sup>H NMR (300 MHz, CDCl<sub>3</sub>) δ 13.62 (s, 1H), 8.99 (s, 1H), 8.10 (d, *J* = 6.0 Hz, 1H), 7.67 (d, *J* = 9.0 Hz, 1H), 7.47-7.45 (m, 5H), 7.30 (s, 2H), 7.20 (t, *J* = 9.0 Hz, 1H), 7.05-6.97 (m, 3H), 6.91 (d, *J* = 9.0 Hz, 1H), 6.42 (t, *J* = 9.0 Hz, 1H), 5.52 (s, 2H), 2.30 (s, 3H); <sup>13</sup>C NMR (75 MHz, CDCl<sub>3</sub>) δ 190.5, 159.5, 151.4, 142.5, 135.9, 133.9, 133.5, 132.0, 130.4, 130.1, 129.9, 129.6, 129.5, 129.5, 128.6, 128.1, 120.0, 118.4, 117.2, 116.4, 108.3, 63.3, 21.5, one carbon missing in the aromatic region. IR (KBr) ν 3426, 2925, 1625, 1451 cm<sup>-1</sup>. HRMS (ESI) calcd for C<sub>28</sub>H<sub>23</sub>N<sub>2</sub>O<sub>3</sub> [M+H]<sup>+</sup>: 435.1703, found: 435.1702.

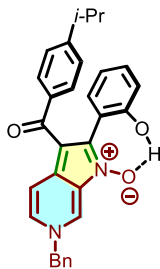

6-Benzyl-2-(2-hydroxyphenyl)-3-(4-isopropylbenzoyl)-6H-pyrrolo[2,3-c]pyridine 1-oxide (**3q**)

Yellow solid obtained by column chromatography (dichloromethane/methanol = 100:1 to 70:1); 44.3 mg, 48% yield; reaction time = 72 h; mp 66.2-68.1 °C; <sup>1</sup>H NMR (300 MHz, CDCl<sub>3</sub>) δ 13.48 (s, 1H), 9.02 (s, 1H), 8.17 (d, *J* = 6.0 Hz, 1H), 7.68 (d, *J* = 6.0 Hz, 1H), 7.46-7.44 (m, 5H), 7.31 (s, 2H), 7.15 (t, *J* = 9.0 Hz, 1H), 7.03-7.00 (m, 3H), 6.85 (d, *J* = 6.0 Hz, 1H), 6.35 (t, *J* = 9.0 Hz, 1H), 5.52 (s, 2H), 2.89-2.80 (m, 1H), 1.19 (d, *J* = 6.0 Hz, 6H); <sup>13</sup>C NMR (75 MHz, CDCl<sub>3</sub>) δ 190.6, 159.5, 153.1, 151.6, 136.3, 133.9, 133.5, 131.9, 130.5, 130.2, 130.0, 129.6, 129.5, 129.5, 128.2, 128.1, 125.9, 119.8, 118.3, 117.2, 116.6, 108.4, 63.3, 34.1, 23.6. IR (KBr) ν 3424, 2928, 1605, 1453, 1256, 751 cm<sup>-1</sup>. HRMS (ESI) calcd for C<sub>30</sub>H<sub>27</sub>N<sub>2</sub>O<sub>3</sub> [M+H]<sup>+</sup>: 463.2016, found: 463.2016.

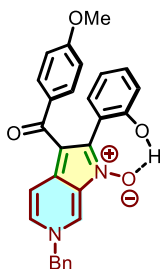

6-Benzyl-2-(2-hydroxyphenyl)-3-(4-methoxybenzoyl)-6H-pyrrolo[2,3-c]pyridine 1-oxide (**3r**)

Yellow solid obtained by column chromatography (petroleum ether/ethyl acetate = 1:1 to 1:6); 48.5 mg, 54% yield; reaction time = 72 h; mp 256.0-257.5 °C; <sup>1</sup>H NMR (400 MHz, DMSO-*d*<sub>6</sub>) δ 14.11 (s, 1H), 9.54 (s, 1H), 8.21 (d, *J* = 8.0 Hz, 1H), 7.68 (d, *J* = 4.0 Hz, 1H), 7.52 (d, *J* = 8.0 Hz, 4H), 7.44-7.36 (m, 3H), 7.20 (t, *J* = 8.0 Hz, 1H), 6.93 (d, *J* = 8.0 Hz, 1H), 6.86 (d, *J* = 8.0 Hz, 1H), 6.82 (d, *J* = 8.0 Hz, 2H), 6.48 (t, *J* = 8.0 Hz, 1H), 5.76 (s, 2H), 3.75 (s, 3H); <sup>13</sup>C NMR (100 MHz, DMSO-*d*<sub>6</sub>) δ 188.2, 162.3, 159.7, 149.4, 135.8, 133.3, 131.8, 131.6, 131.4, 131.3, 129.4, 129.1, 129.0, 128.9, 128.3, 119.7, 117.9, 117.5, 115.6, 113.4, 107.0, 61.5, 55.4, one carbon missing in the aromatic region. IR (KBr) ν 3412, 2927, 1600, 1453, 1253, 762 cm<sup>-1</sup>. HRMS (ESI) calcd for C<sub>28</sub>H<sub>23</sub>N<sub>2</sub>O<sub>4</sub> [M+H]<sup>+</sup>: 451.1652, found: 451.1675.

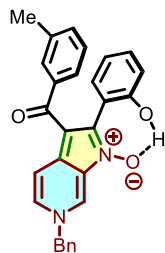

6-Benzyl-2-(2-hydroxyphenyl)-3-(3-methylbenzoyl)-6*H*-pyrrolo[2,3-*c*]pyridine 1-oxide (**3s**)

Yellow solid obtained by column chromatography (dichloromethane/methanol = 150:1 to 80:1); 41.2 mg, 47% yield; reaction time = 72 h; mp 130.5-131.1 °C; <sup>1</sup>H NMR (300 MHz, CDCl<sub>3</sub>) δ 13.55 (s, 1H), 9.10 (s, 1H), 8.13 (d, *J* = 9.0 Hz, 1H), 7.66 (d, *J* = 6.0 Hz, 1H), 7.44-7.31 (m, 7H), 7.18-7.01 (m, 4H), 6.89 (d, *J* = 9.0 Hz, 1H), 6.40 (t, *J* = 9.0 Hz, 1H), 5.51 (s, 2H), 2.20 (s, 3H); <sup>13</sup>C NMR (75 MHz, CDCl<sub>3</sub>) δ 190.9, 159.6, 151.6, 138.4, 137.6, 133.7, 133.5, 132.5, 132.1, 130.6, 130.2, 130.1, 129.6, 129.5, 128.2, 128.1, 127.8, 126.4, 119.8, 118.4, 117.3, 116.6, 108.3, 63.3, 21.0, one carbon missing in the aromatic region. IR (KBr) ν 3423, 2926, 1627, 1454, 756 cm<sup>-1</sup>. HRMS (ESI) calcd for C<sub>28</sub>H<sub>23</sub>N<sub>2</sub>O<sub>3</sub> [M+H]<sup>+</sup>: 435.1703, found: 435.1702.

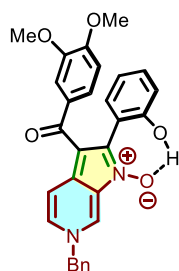

6-Benzyl-3-(3,4-dimethoxybenzoyl)-2-(2-hydroxyphenyl)-6*H*-pyrrolo[2,3-*c*]pyridine 1-oxide (**3t**)

Yellow solid obtained by column chromatography (dichloromethane/methanol = 100:1 to 50:1); 30.7 mg, 33% yield; reaction time = 72 h; mp 204.4-205.3 °C; <sup>1</sup>H NMR (300 MHz, CDCl<sub>3</sub>) δ 13.72 (s, 1H), 9.10 (s, 1H), 8.13 (d, *J* = 6.0 Hz, 1H), 7.67 (d, *J* = 6.0 Hz, 1H), 7.44 (s, 3H), 7.30-7.29 (m, 3H), 7.20 (t, *J* = 6.0 Hz, 1H), 7.07 (s, 1H), 7.02 (d, *J* = 6.0 Hz, 1H), 6.93 (d, *J* = 6.0 Hz, 1H), 6.67 (d, *J* = 9.0 Hz, 1H), 6.46 (t, *J* = 6.0 Hz, 1H), 5.51 (s, 2H), 3.86 (s, 3H), 3.75 (s, 3H); <sup>13</sup>C NMR (75 MHz, CDCl<sub>3</sub>) δ 189.5, 159.5, 152.2, 151.3, 148.1, 133.8, 133.4, 132.3, 131.0, 130.4, 130.1, 129.9, 129.7, 129.6, 128.1, 128.0, 123.9, 120.0, 118.6, 117.5, 116.7, 111.9, 109.9, 108.5, 63.4, 55.9, 55.7. IR (KBr) ν 3431, 2379, 1627, 1456, 1270, 761 cm<sup>-1</sup>. HRMS (ESI) calcd for C<sub>29</sub>H<sub>25</sub>N<sub>2</sub>O<sub>5</sub> [M+H]<sup>+</sup>: 481.1758, found: 481.1758.

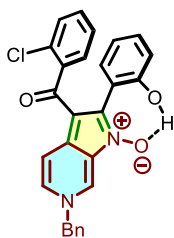

6-Benzyl-3-(2-chlorobenzoyl)-2-(2-hydroxyphenyl)-6*H*-pyrrolo[2,3-*c*]pyridine 1-oxide (**3u**)

Yellow solid obtained by column chromatography (dichloromethane/methanol = 150:1 to 70:1); 62.4 mg, 69% yield; reaction time = 60 h; mp 251.7-252.9 °C; <sup>1</sup>H NMR (300 MHz, DMSO-*d*<sub>6</sub>) δ 13.42 (s, 1H), 9.58 (s, 1H), 8.32 (dd, *J*<sub>1</sub> = 6.0 Hz, *J*<sub>2</sub> = 3.0 Hz, 1H), 7.55-7.50 (m, 3H), 7.45-7.38 (m, 3H), 7.32-7.29 (m, 3H), 7.27-7.16 (m, 3H), 6.82 (d, *J* = 6.0 Hz, 1H), 6.50 (t, *J* = 6.0 Hz, 1H), 5.76 (s, 2H); <sup>13</sup>C NMR (75 MHz, DMSO-*d*<sub>6</sub>) δ 186.6, 159.4, 150.1, 139.9, 135.5, 133.5, 133.4, 131.8, 131.3, 130.5, 130.3, 130.1, 129.7, 129.6, 129.5, 129.1, 128.9, 128.4, 127.1, 119.4, 117.5, 116.9, 115.7, 106.8, 61.7. IR (KBr) ν 3430, 2378, 1627, 1458, 759 cm<sup>-1</sup>. HRMS (ESI) calcd for C<sub>27</sub>H<sub>20</sub>ClN<sub>2</sub>O<sub>3</sub> [M+H]<sup>+</sup>: 455.1157, found: 455.1161.

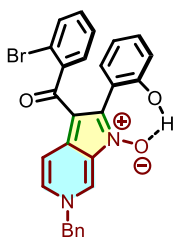

6-Benzyl-3-(2-bromobenzoyl)-2-(2-hydroxyphenyl)-6*H*-pyrrolo[2,3-*c*]pyridine 1-oxide (**3v**)

Yellow solid obtained by column chromatography (dichloromethane/methanol = 150:1 to 70:1); 67.1 mg, 67% yield; reaction time = 48 h; mp 219.0-220.1 °C; <sup>1</sup>H NMR (300 MHz, CDCl<sub>3</sub>) δ 13.09 (s, 1H), 9.15 (s, 1H), 8.01 (d, *J* = 6.0 Hz, 1H), 7.64 (d, *J* = 6.0 Hz, 1H), 7.43-7.32 (m, 4H), 7.22 (dd, *J*<sub>1</sub> = 6.0 Hz, *J*<sub>2</sub> = 3.0 Hz, 2H), 7.16-7.02 (m, 5H), 6.90 (d, *J* = 9.0 Hz, 1H), 6.46 (t, *J* = 6.0 Hz, 1H), 5.43 (s, 2H); <sup>13</sup>C NMR (75 MHz, CDCl<sub>3</sub>) δ 189.0, 159.4, 152.1, 141.0, 133.8, 133.3, 132.1, 131.5, 131.2, 131.0, 130.8, 129.9, 129.7, 129.6, 128.4, 128.2, 126.9, 120.7, 119.9, 118.3, 117.0, 116.7, 108.0, 63.4, one carbon missing in the aromatic region. IR (KBr) ν 3423, 2378, 1623, 1456, 758 cm<sup>-1</sup>. HRMS (ESI) calcd for C<sub>27</sub>H<sub>20</sub>BrN<sub>2</sub>O<sub>3</sub> [M+H]<sup>+</sup>: 499.0652, found: 499.0647.

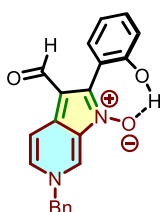



### 6-Benzyl-3-formyl-2-(2-hydroxyphenyl)-6*H*-pyrrolo[2,3-*c*]pyridine 1-oxide (**3w**)

Yellow solid obtained by column chromatography (dichloromethane/methanol = 120:1 to 90:1); 21.3 mg, 31% yield; reaction time = 72 h; mp 186.5-187.1 °C; <sup>1</sup>H NMR (300 MHz, CDCl<sub>3</sub>) δ 13.61 (s, 1H), 9.97 (s, 1H), 9.16 (s, 1H), 8.52 (d, *J* = 6.0 Hz, 1H), 7.81 (d, *J* = 6.0 Hz, 1H), 7.51 (d, *J* = 3.0 Hz, 2H), 7.44 (s, 3H), 7.30 (s, 2H), 7.16 (d, *J* = 9.0 Hz, 1H), 7.03 (t, *J* = 6.0 Hz, 1H), 5.57 (s, 2H); <sup>13</sup>C NMR (100 MHz, CDCl<sub>3</sub>) δ 185.7, 160.5, 153.3, 133.1, 133.1, 131.7, 131.2, 129.9, 129.7, 129.7, 128.3, 128.1, 121.0, 119.3, 117.5, 116.1, 108.6, 63.7, one carbon missing in the aromatic region. IR (KBr) ν 3411, 3061, 1633, 1456, 1123, 759 cm<sup>-1</sup>. HRMS (ESI) calcd for C<sub>21</sub>H<sub>17</sub>N<sub>2</sub>O<sub>3</sub> [M+H]<sup>+</sup>: 345.1234, found: 345.1248.

## 4. Methodology application

### 4.1 Scalable preparation of **3a**

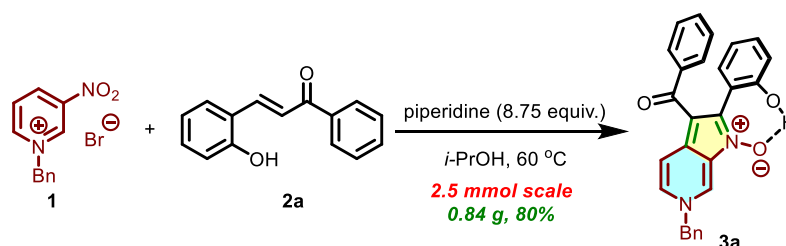

**General procedure for scalable preparation of **3a**:** To a solution of *N*-benzyl pyridinium salt **1a** (0.56 g, 2.5 mmol) and *ortho*-hydroxychalcone **2a** (2.58 g, 8.75 mmol) in *i*-PrOH (12.5 mL) was added piperidine (1.86 g, 21.88 mmol) successively. After being stirred at 60 °C for 48 h, the mixture was concentrated in vacuum. The residue was purified via flash column chromatography on silica gel (petroleum ether/ ethyl acetate) to afford the corresponding product **3a** as yellow solid in 80% yield (0.84 g).

### 4.2 Chemical conversions of **3a**

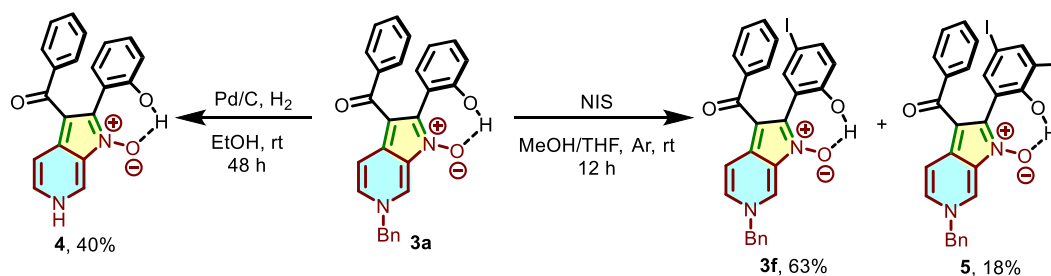

**General procedure for the preparation of **4**:** To a solution of **3a** (63.1 mg, 0.15 mmol) in EtOH (1.0 mL) was added Pd/C (31.9 mg). Hydrogenation was carried out under hydrogen

atmosphere at room temperature under atmospheric pressure for 48 h. Then, the reaction mixture was filtered and the filtrate was concentrated in vacuo. Purification of the residue by flash column chromatography afforded the desired product **4** (19.7 mg, 40% yield).

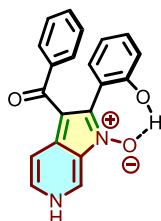

3-Benzoyl-2-(2-hydroxyphenyl)-6*H*-pyrrolo[2,3-*c*]pyridine 1-oxide (**4**)

Yellow solid obtained by column chromatography (dichloromethane/methanol = 100:1 to 20:1); 19.7 mg, 40% yield; reaction time = 48 h; mp 129.6-130.8 °C; <sup>1</sup>H NMR (400 MHz, DMSO-*d*<sub>6</sub>) δ 9.02 (s, 1H), 8.21 (d, *J* = 4.0 Hz, 1H), 7.76 (d, *J* = 8.0 Hz, 1H), 7.48 (d, *J* = 8.0 Hz, 2H), 7.36 (t, *J* = 8.0 Hz, 1H), 7.21 (t, *J* = 9.0 Hz, 2H), 7.14-7.07 (m, 2H), 6.74 (d, *J* = 8.0 Hz, 1H), 6.57 (t, *J* = 8.0 Hz, 1H), the protons of N-H and O-H were missing; <sup>13</sup>C NMR (100 MHz, DMSO-*d*<sub>6</sub>) δ 190.2, 157.5, 145.3, 139.3, 135.5, 132.7, 131.3, 131.1, 129.9, 129.8, 129.2, 128.7, 127.6, 118.0, 117.2, 116.5, 114.8, 107.4. IR (KBr) ν 3439, 1616, 1459, 1022, 758 cm<sup>-1</sup>. HRMS (ESI) calcd for C<sub>20</sub>H<sub>15</sub>N<sub>2</sub>O<sub>3</sub> [M+H]<sup>+</sup>: 331.1077, found: 331.1087.

**General procedure for the formation of 3f and 5:** Under Ar atmosphere, to a solution of **3a** (63.1 mg, 0.15 mmol) in 2.0 mL of combined MeOH and THF (v/v = 1:1), NIS (33.8 mg, 0.15 mmol) was added. The resulting mixture was stirred at room temperature for 12 h, and then purified by silica gel column chromatography (dichloromethane/methanol = 35:1) to afford **3f** and **5** in 63% and 18% yields, respectively.

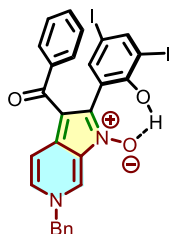

3-Benzoyl-6-benzyl-2-(2-hydroxy-3,5-diiodophenyl)-6*H*-pyrrolo[2,3-*c*]pyridine 1-oxide (**5**)

Yellow solid obtained by column chromatography (dichloromethane/methanol = 150:1 to 110:1); 17.8 mg, 18% yield; reaction time = 12 h; mp 81.4-82.1 °C; <sup>1</sup>H NMR (400 MHz, CDCl<sub>3</sub>) δ 15.09 (br, 1H), 9.23 (s, 1H), 8.26 (d, *J* = 8.0 Hz, 1H), 7.83 (d, *J* = 4.0 Hz, 1H), 7.76 (d, *J* = 8.0 Hz, 1H),

7.48-7.43 (m, 5H), 7.37 (t,  $J = 8.0$  Hz, 1H), 7.31-7.22 (m, 4H), 7.03 (d,  $J = 4.0$  Hz, 1H), 5.62 (s, 2H);  $^{13}\text{C}$  NMR (100 MHz,  $\text{CDCl}_3$ )  $\delta$  190.8, 159.2, 149.1, 148.1, 142.6, 138.3, 133.1, 132.1, 131.0, 130.8, 129.8, 129.7, 129.6, 128.9, 128.8, 128.3, 128.2, 118.1, 117.5, 108.5, 91.5, 78.6, 63.8. IR (KBr)  $\nu$  3300, 2926, 1704, 1635, 1184  $\text{cm}^{-1}$ . HRMS (ESI) calcd for  $\text{C}_{27}\text{H}_{19}\text{I}_2\text{N}_2\text{O}_3$   $[\text{M}+\text{H}]^+$ : 672.9480, found: 672.9485.

### 4.3 Chemical conversions of 3o

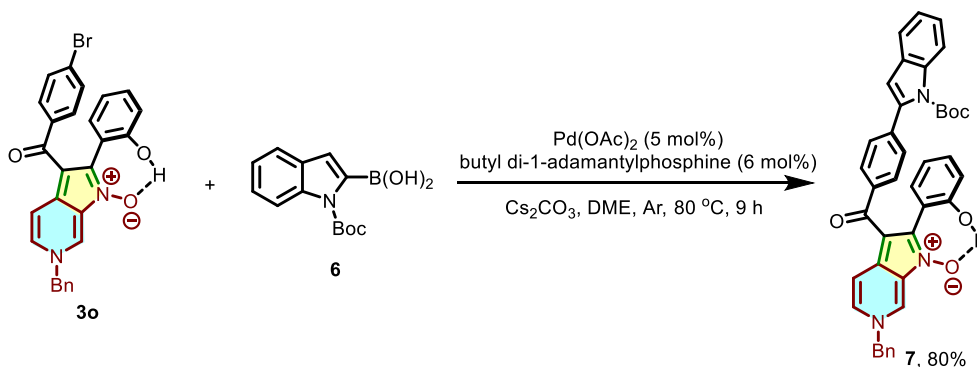

**General procedure for the formation of 7:** Under nitrogen atmosphere, compound **3o** (74.9 mg, 0.15 mmol), 2-indolylboronic acid **6** (58.7 mg, 0.225 mmol, 1.5 equiv),  $\text{Cs}_2\text{CO}_3$  (97.8 mg, 0.30 mmol, 2.0 equiv),  $\text{Pd}(\text{OAc})_2$  (0.05 equiv) and butyl di-1-adamantylphosphine (0.06 equiv) were successively added to a 15 mL dried Schlenk tube, followed by addition of 1.5 mL of DME. The resulting mixture was stirred at 80 °C for 9 h, and then the reaction mixture was directly subjected to silica gel column chromatography (dichloromethane/methanol as eluent) to afford **7** as a yellow solid in 80% yield.

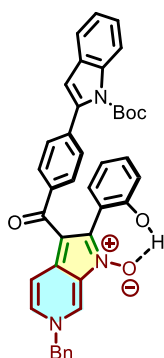

6-Benzyl-3-(4-(1-(*tert*-butoxycarbonyl)-1*H*-indol-2-yl)benzoyl)-2-(2-hydroxyphenyl)-6*H*-pyrrolo[2,3-*c*]pyridine 1-oxide (**7**)

Yellow solid obtained by column chromatography (dichloromethane/methanol = 150:1 to 90:1); 76.2 mg, 80% yield; reaction time = 9 h; mp 70.1-70.9 °C;  $^1\text{H}$  NMR (400 MHz,  $\text{CDCl}_3$ )  $\delta$  13.68 (s,

1H), 9.25 (s, 1H), 8.18 (d,  $J = 8.0$  Hz, 1H), 8.03 (d,  $J = 8.0$  Hz, 1H), 7.59-7.57 (m, 4H), 7.38 (s, 4H), 7.29-7.19 (m, 6H), 7.02 (d,  $J = 8.0$  Hz, 1H), 6.91 (d,  $J = 8.0$  Hz, 1H), 6.51 (s, 1H), 6.44 (t,  $J = 8.0$  Hz, 1H), 5.44 (s, 2H), 1.35 (s, 9H);  $^{13}\text{C}$  NMR (100 MHz,  $\text{CDCl}_3$ )  $\delta$  189.9, 159.6, 151.3, 149.9, 139.5, 137.9, 137.6, 137.4, 133.8, 133.5, 132.0, 130.4, 130.3, 130.1, 129.5, 129.4, 129.0, 128.9, 128.5, 128.1, 127.9, 124.6, 123.0, 120.6, 120.0, 118.5, 117.3, 116.5, 115.2, 110.8, 108.1, 83.8, 63.2, 27.6. IR (KBr)  $\nu$  2916, 2855, 1735, 1622, 1455, 1151  $\text{cm}^{-1}$ . HRMS (ESI) calcd for  $\text{C}_{40}\text{H}_{34}\text{N}_3\text{O}_5$   $[\text{M}+\text{H}]^+$ : 636.2493, found: 636.2499.

## 5. Crystal structures

### 5.1 Crystal structure of **3n**

Preparation of the single crystals of **3n**: 22.0 mg of pure compound **3n** was dissolved in the combined solvents of dichloromethane and methanol (4 mL, v/v = 1:3) at room temperature. The bottle was sealed by a piece of plastic film with several tiny holes, thus allowing slow evaporation of the solvents at room temperature. After about two days, several small particles were observed at the bottom of the bottle. The crystals were chosen and subjected to the single crystal X-ray diffraction analysis for the determination of the structure of **3n**. The data were collected on a SuperNova, Dual, Cu at zero, AtlasS2 diffractometer. The crystal was kept at 292.99(10) K during data collection.

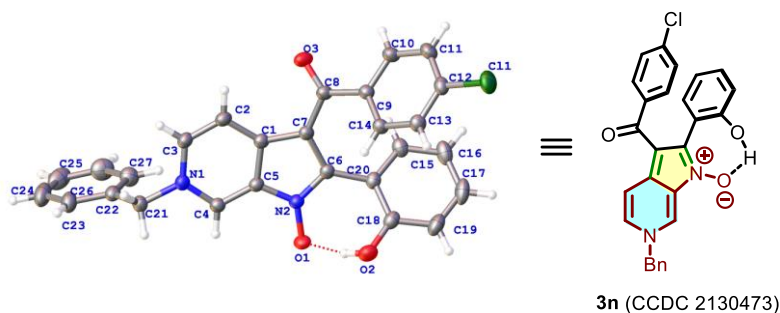

Table S2 Crystal data and structure refinement for **3n**.

|                     |                                                    |
|---------------------|----------------------------------------------------|
| Identification code | <b>3n</b>                                          |
| Empirical formula   | $\text{C}_{27}\text{H}_{19}\text{ClN}_2\text{O}_3$ |
| Formula weight      | 454.89                                             |
| Temperature/K       | 292.99(10)                                         |
| Crystal system      | monoclinic                                         |

|                                             |                                                               |
|---------------------------------------------|---------------------------------------------------------------|
| Space group                                 | P2 <sub>1</sub> /c                                            |
| a/Å                                         | 11.7534(3)                                                    |
| b/Å                                         | 13.7503(4)                                                    |
| c/Å                                         | 13.8861(4)                                                    |
| α/°                                         | 90                                                            |
| β/°                                         | 101.298(3)                                                    |
| γ/°                                         | 90                                                            |
| Volume/Å <sup>3</sup>                       | 2200.68(11)                                                   |
| Z                                           | 4                                                             |
| ρ <sub>calc</sub> /cm <sup>3</sup>          | 1.373                                                         |
| μ/mm <sup>-1</sup>                          | 1.806                                                         |
| F(000)                                      | 944.0                                                         |
| Crystal size/mm <sup>3</sup>                | 0.15 × 0.12 × 0.1                                             |
| Radiation                                   | Cu Kα (λ = 1.54184)                                           |
| 2θ range for data collection/°              | 7.67 to 147.278                                               |
| Index ranges                                | -14 ≤ h ≤ 13, -15 ≤ k ≤ 16, -17 ≤ l ≤ 15                      |
| Reflections collected                       | 8758                                                          |
| Independent reflections                     | 4315 [R <sub>int</sub> = 0.0288, R <sub>sigma</sub> = 0.0363] |
| Data/restraints/parameters                  | 4315/0/300                                                    |
| Goodness-of-fit on F <sup>2</sup>           | 1.038                                                         |
| Final R indexes [I ≥ 2σ (I)]                | R <sub>1</sub> = 0.0482, wR <sub>2</sub> = 0.1321             |
| Final R indexes [all data]                  | R <sub>1</sub> = 0.0566, wR <sub>2</sub> = 0.1427             |
| Largest diff. peak/hole / e Å <sup>-3</sup> | 0.27/-0.49                                                    |

## 5.2 Crystal structure of **5**

Preparation of the single crystals of **5**: 22.0 mg of pure compound **5** was dissolved in 0.5 mL of chloroform at room temperature. The bottle was sealed by a piece of plastic film with several tiny holes, thus allowing slow evaporation of the solvents at room temperature. After about two days, several small particles were observed at the bottom of the bottle. The crystals were chosen

and subjected to the single crystal X-ray diffraction analysis for the determination of the structure of **5**. The data were collected on a Bruker APEX-II CCD diffractometer. The crystal was kept at 150.0 K during data collection.

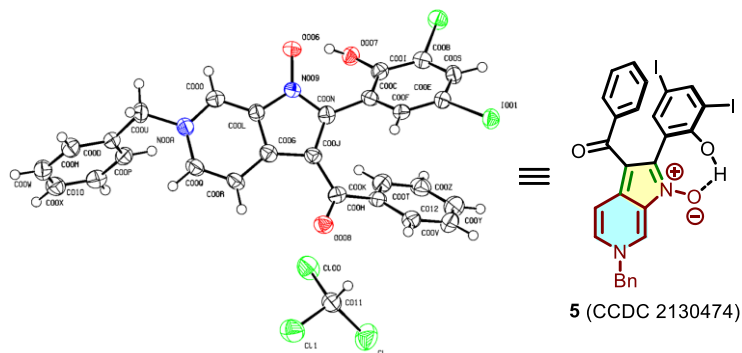

Table S3 Crystal data and structure refinement for **5**.

|                              |                             |
|------------------------------|-----------------------------|
| Identification code          | <b>5</b>                    |
| Empirical formula            | $C_{28}H_{19}Cl_3I_2N_2O_3$ |
| Formula weight               | 791.60                      |
| Temperature/K                | 150.0                       |
| Crystal system               | triclinic                   |
| Space group                  | P-1                         |
| $a/\text{\AA}$               | 9.8911(5)                   |
| $b/\text{\AA}$               | 11.6189(5)                  |
| $c/\text{\AA}$               | 12.7499(7)                  |
| $\alpha/^\circ$              | 94.433(2)                   |
| $\beta/^\circ$               | 101.832(2)                  |
| $\gamma/^\circ$              | 98.841(2)                   |
| Volume/ $\text{\AA}^3$       | 1408.10(12)                 |
| Z                            | 2                           |
| $\rho$ calcg/cm <sup>3</sup> | 1.867                       |
| $\mu$ /mm <sup>-1</sup>      | 2.552                       |
| F(000)                       | 764.0                       |

|                                                  |                                                                        |
|--------------------------------------------------|------------------------------------------------------------------------|
| Crystal size/mm <sup>3</sup>                     | 0.2 × 0.15 × 0.1                                                       |
| Radiation                                        | MoK $\alpha$ ( $\lambda$ = 0.71073)                                    |
| 2 $\Theta$ range for data collection/ $^{\circ}$ | 4.272 to 52.95                                                         |
| Index ranges                                     | -12 $\leq$ h $\leq$ 12, -14 $\leq$ k $\leq$ 14, -15 $\leq$ l $\leq$ 15 |
| Reflections collected                            | 34449                                                                  |
| Independent reflections                          | 5812 [Rint = 0.0698, Rsigma = 0.0482]                                  |
| Data/restraints/parameters                       | 5812/0/344                                                             |
| Goodness-of-fit on F <sup>2</sup>                | 1.073                                                                  |
| Final R indexes [I $\geq$ 2 $\sigma$ (I)]        | R1 = 0.0389, wR2 = 0.0778                                              |
| Final R indexes [all data]                       | R1 = 0.0595, wR2 = 0.0900                                              |
| Largest diff. peak/hole / e $\text{\AA}^{-3}$    | 0.57/-0.54                                                             |

## 6. NMR spectra

$^1\text{H}$  NMR spectrum of **3a** (300 MHz,  $\text{CDCl}_3$ )

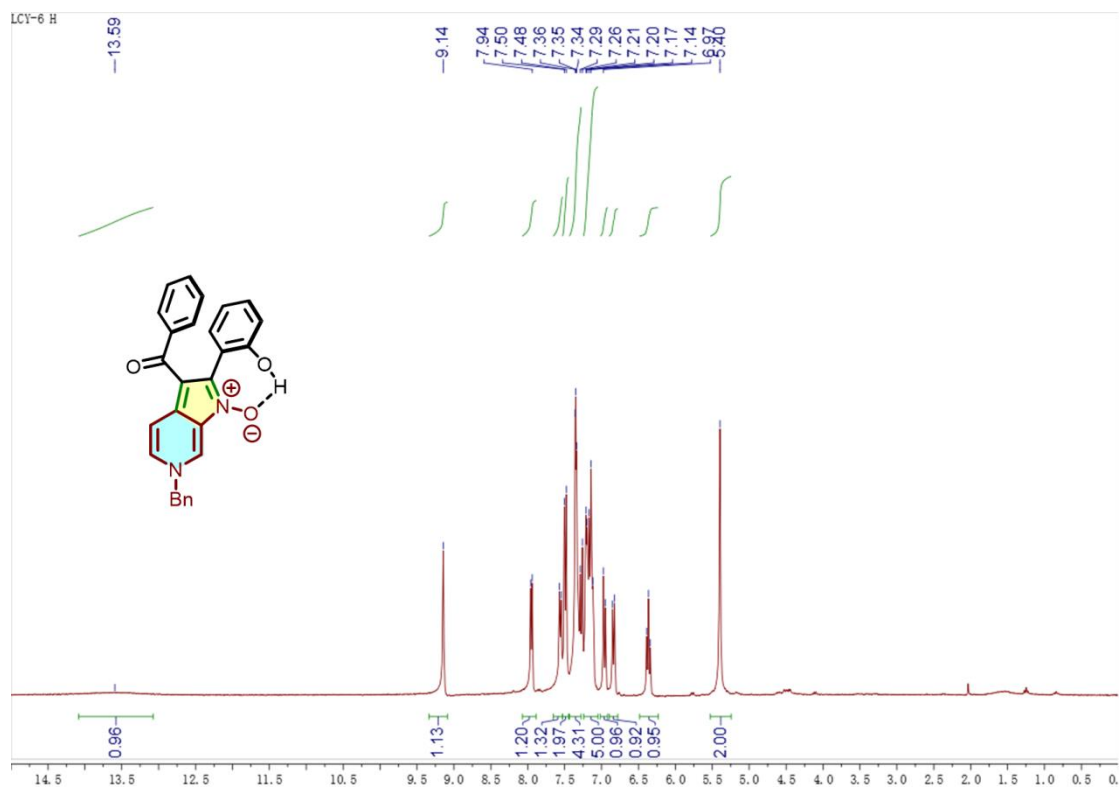

$^{13}\text{C}$  NMR spectrum of **3a** (75 MHz,  $\text{CDCl}_3$ )

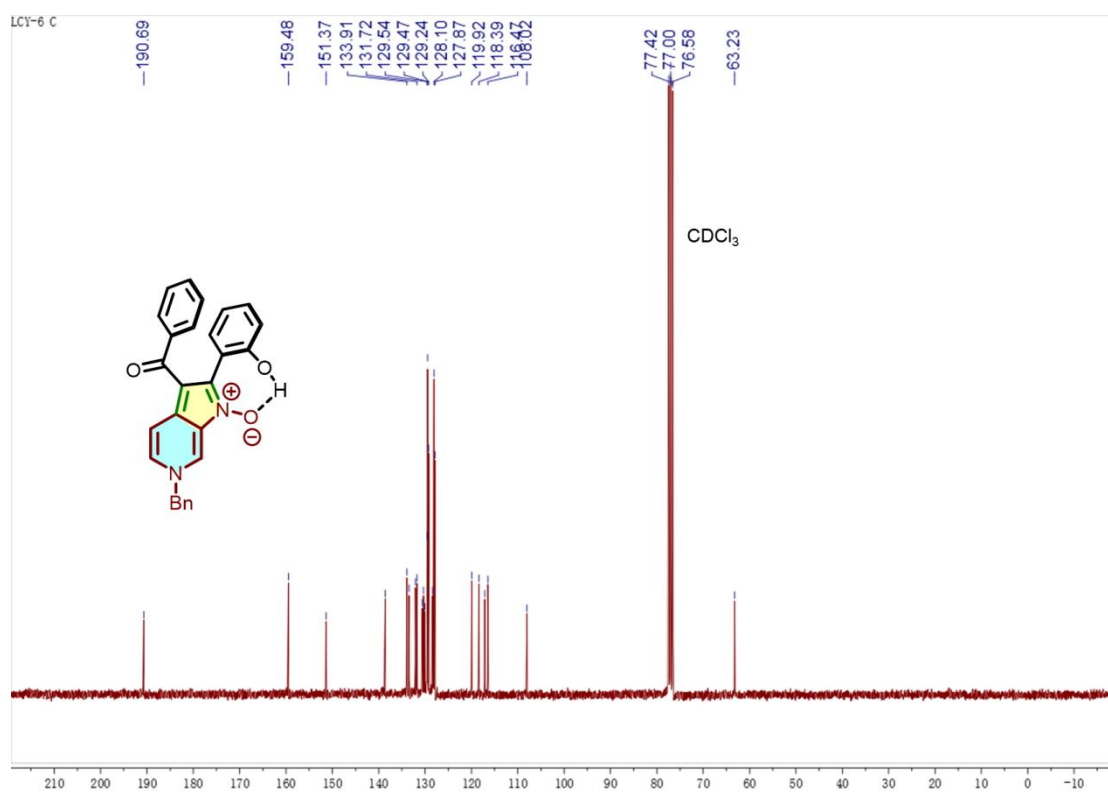



<sup>1</sup>H NMR spectrum of **3b** (300 MHz, DMSO-*d*<sub>6</sub>)

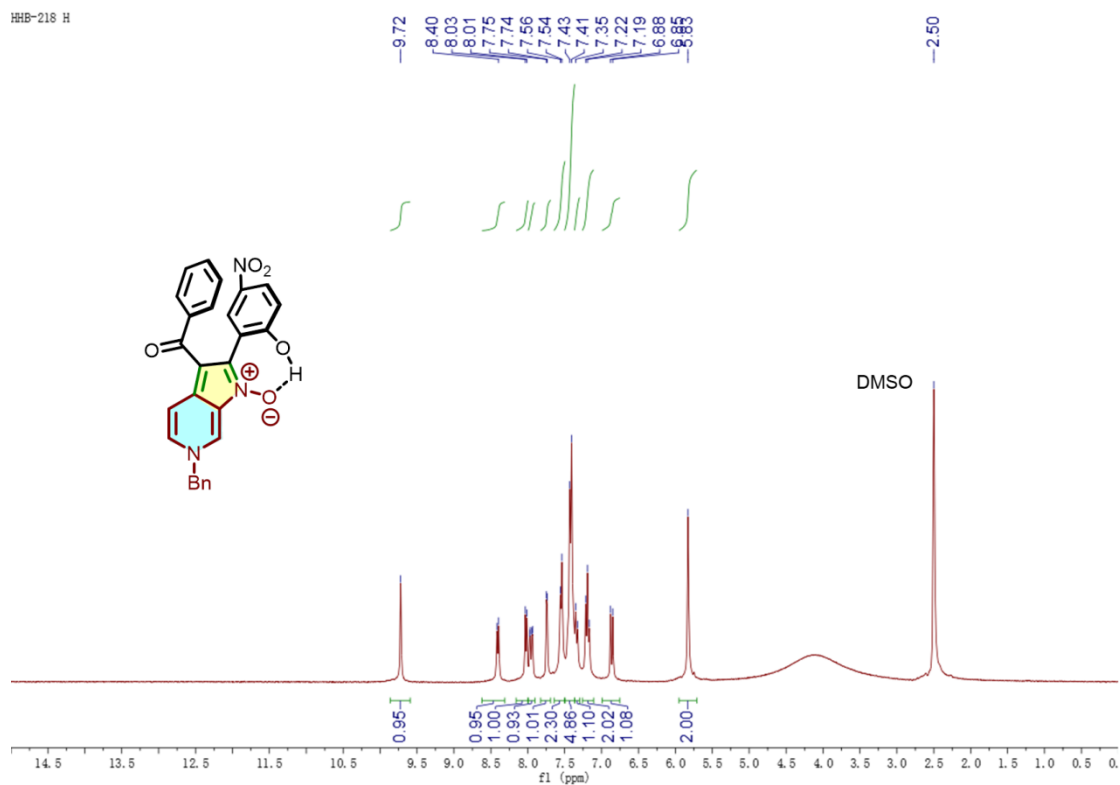

<sup>13</sup>C NMR spectrum of **3b** (75 MHz, DMSO-*d*<sub>6</sub>)

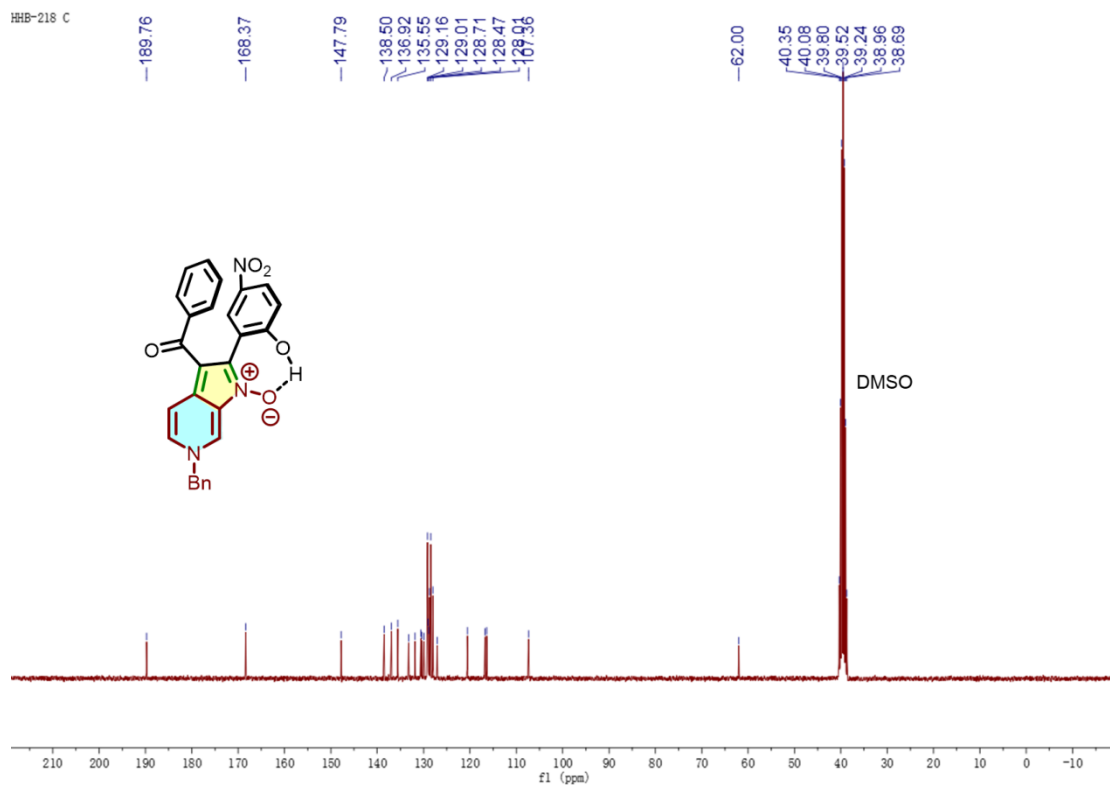

$^1\text{H}$  NMR spectrum of **3c** (300 MHz,  $\text{DMSO-}d_6$ )

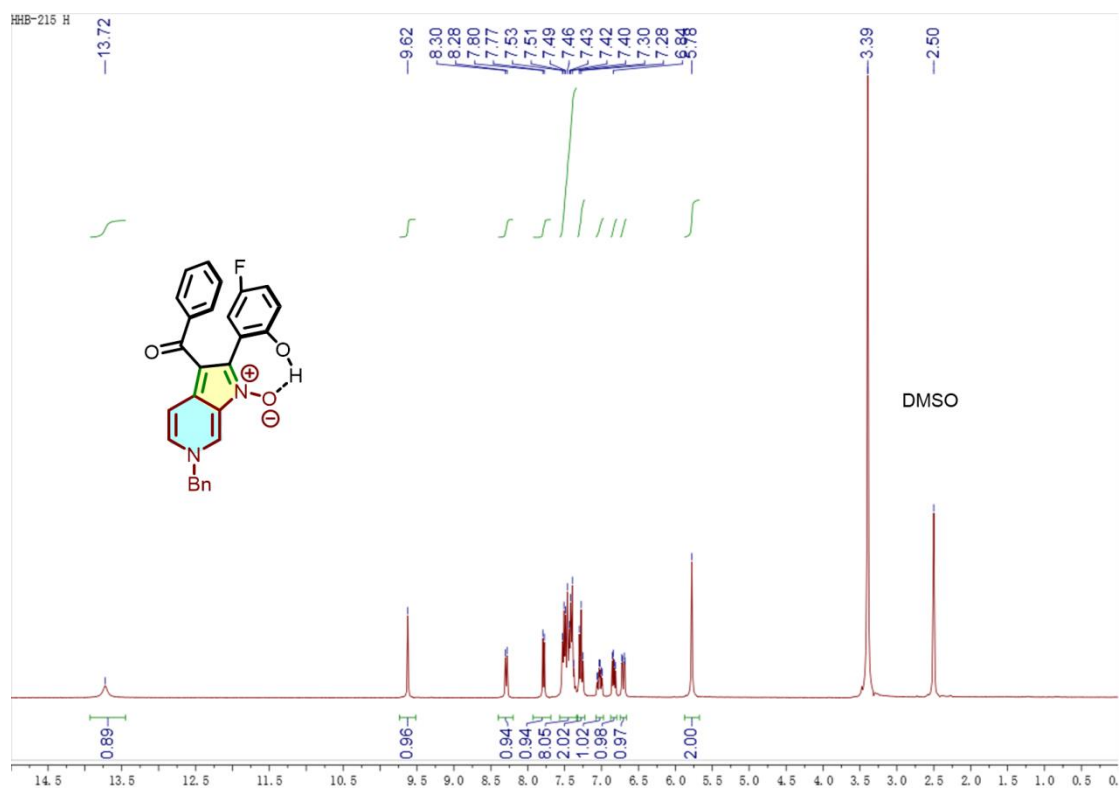

$^{13}\text{C}$  NMR spectrum of **3c** (75 MHz,  $\text{DMSO-}d_6$ )

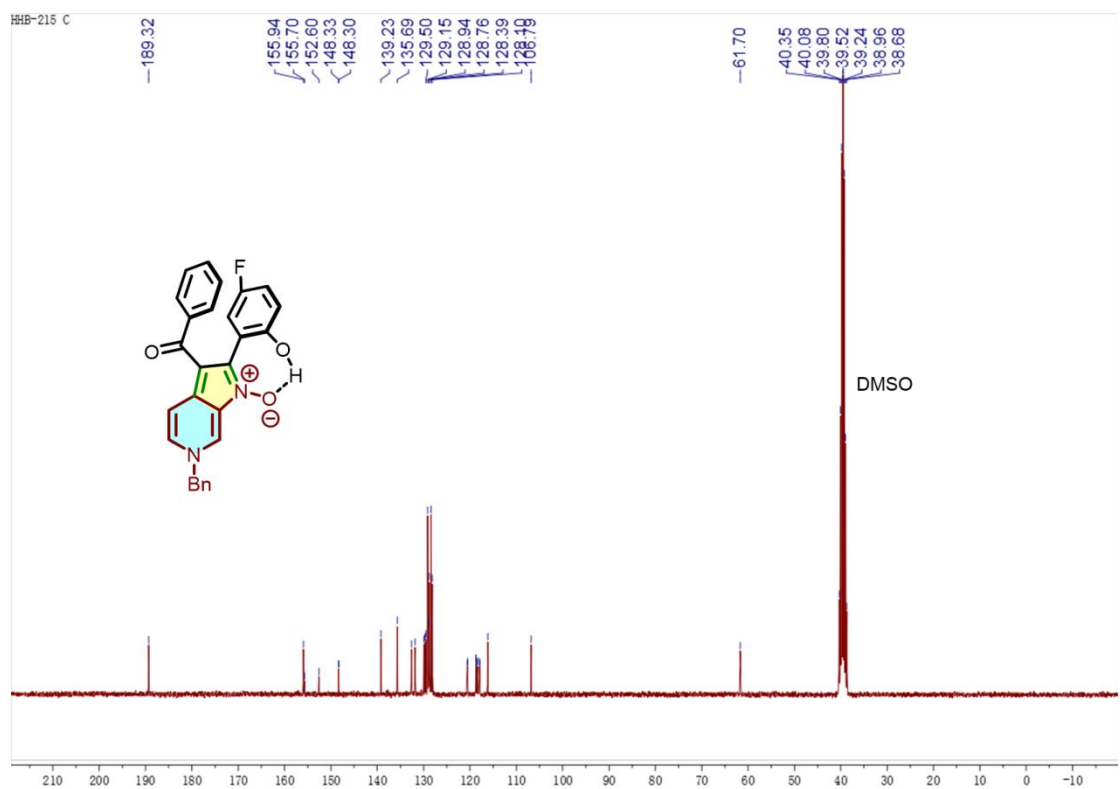

$^{19}\text{F}$  NMR spectrum of **3c** (376 MHz,  $\text{DMSO-}d_6$ )

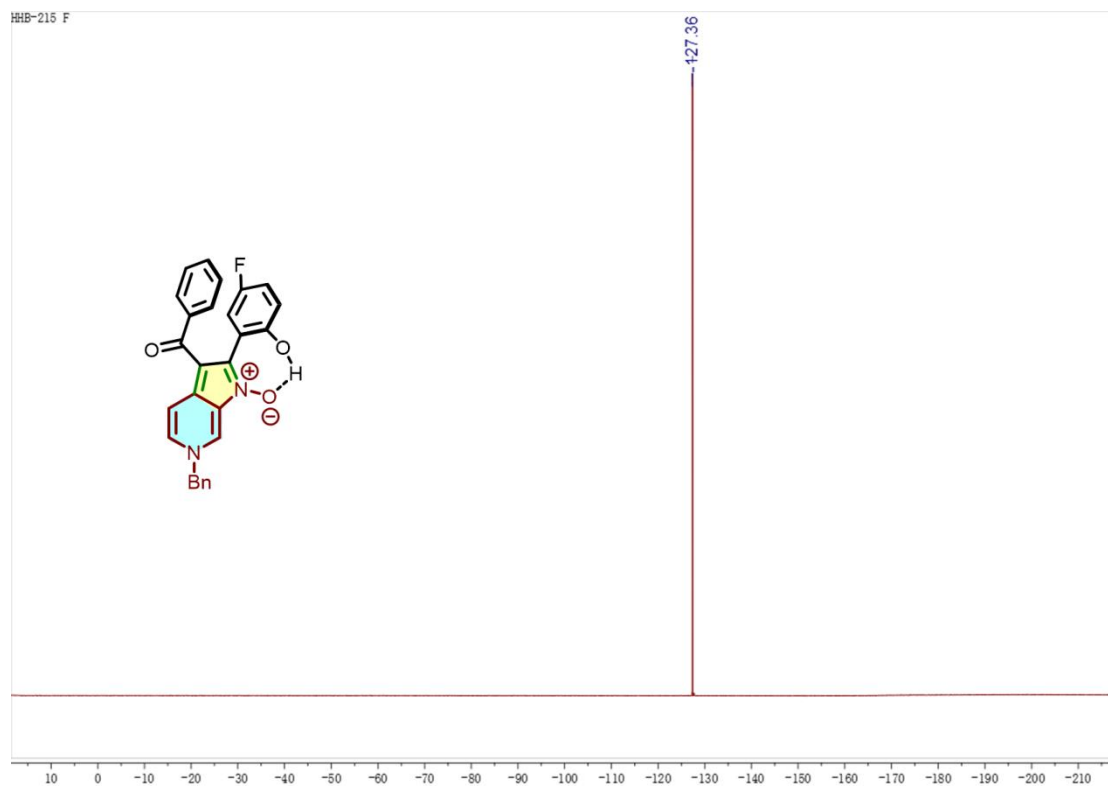

$^1\text{H}$  NMR spectrum of **3d** (400 MHz,  $\text{DMSO-}d_6$ )

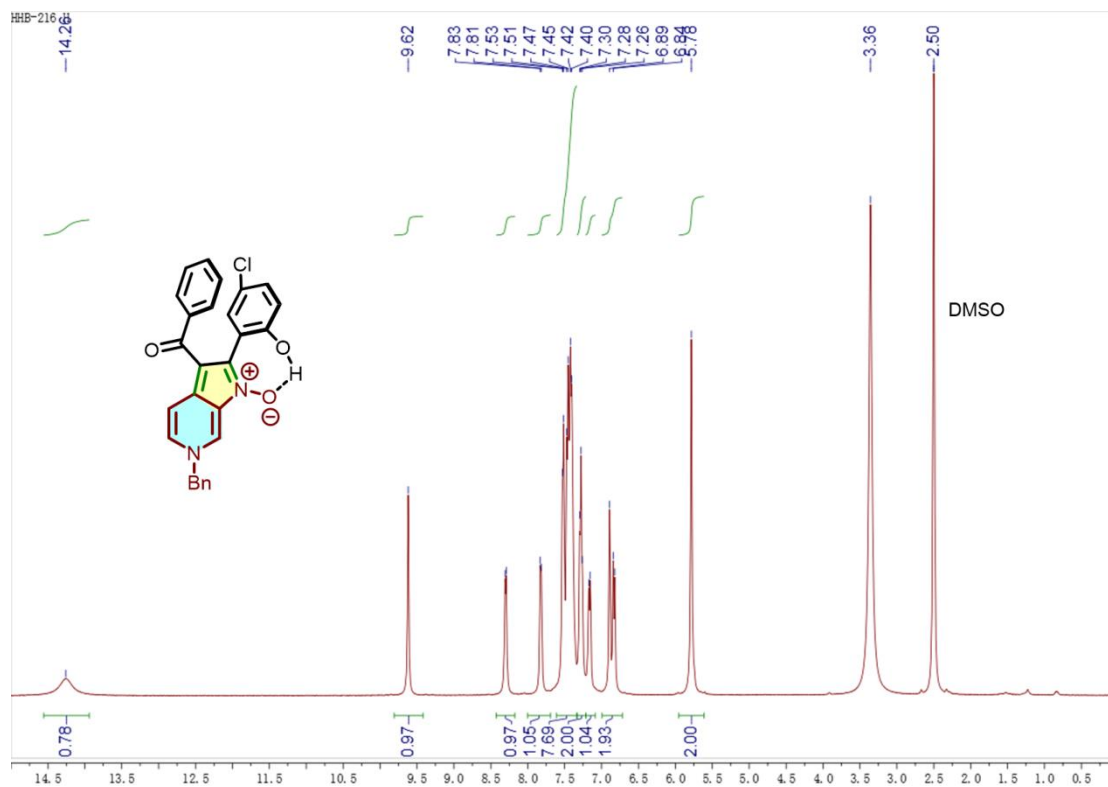

$^{13}\text{C}$  NMR spectrum of **3d** (100 MHz,  $\text{DMSO-}d_6$ )

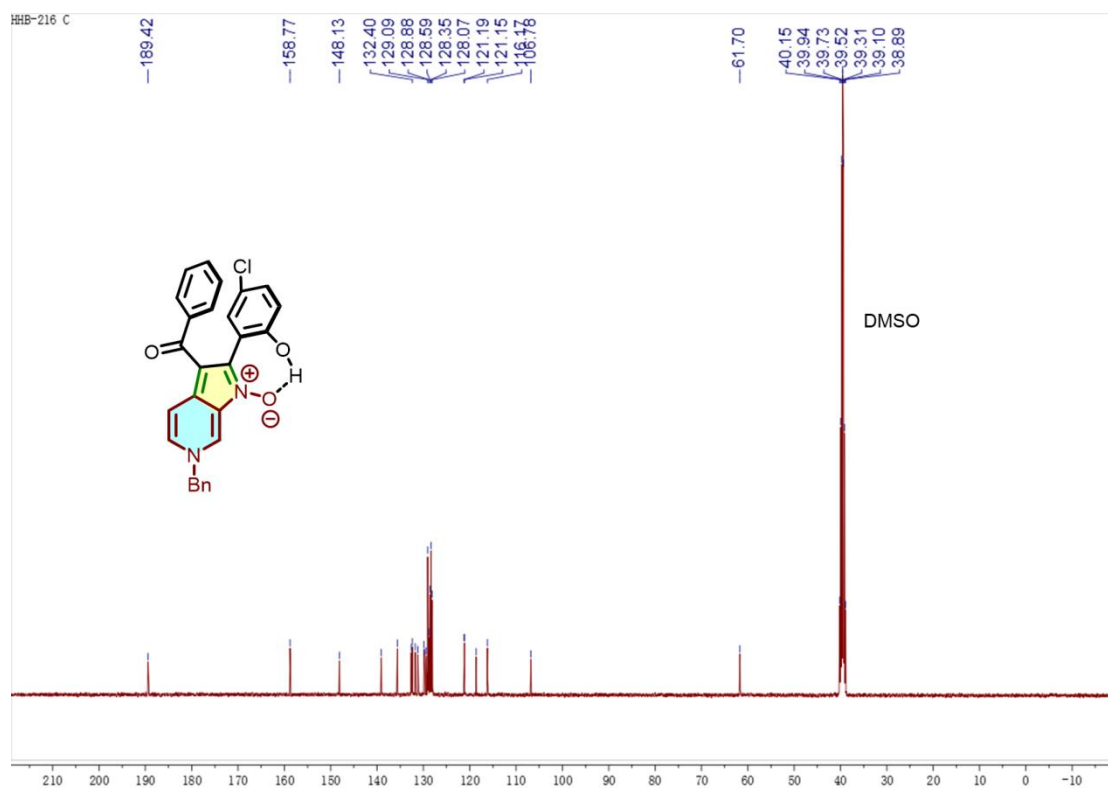

$^1\text{H}$  NMR spectrum of **3e** (300 MHz,  $\text{DMSO-}d_6$ )

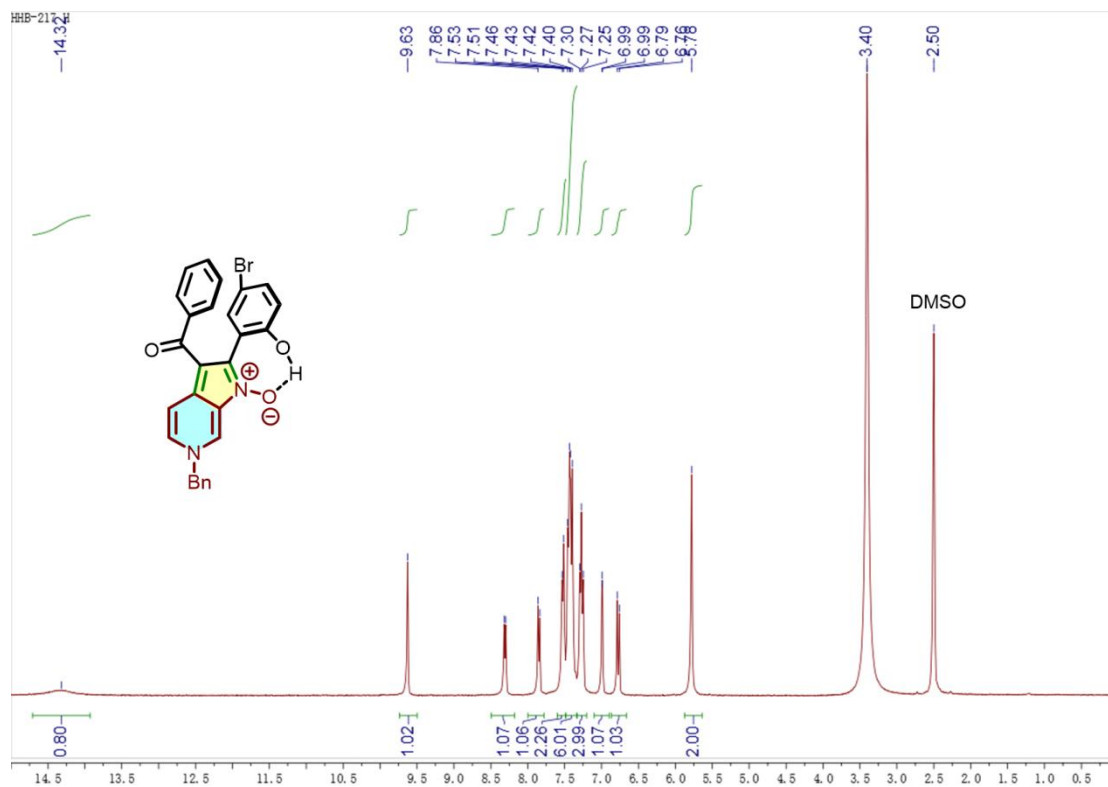

$^{13}\text{C}$  NMR spectrum of **3e** (75 MHz,  $\text{DMSO-}d_6$ )

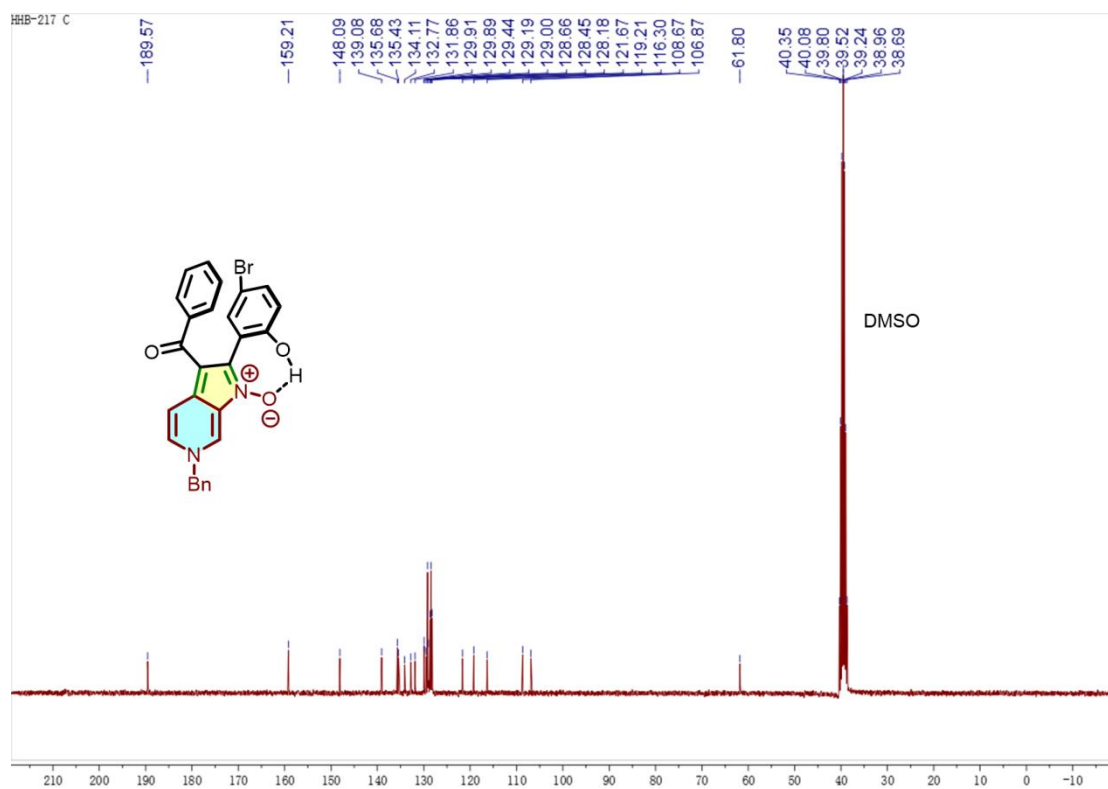

$^1\text{H}$  NMR spectrum of **3f** (400 MHz,  $\text{CDCl}_3$ )

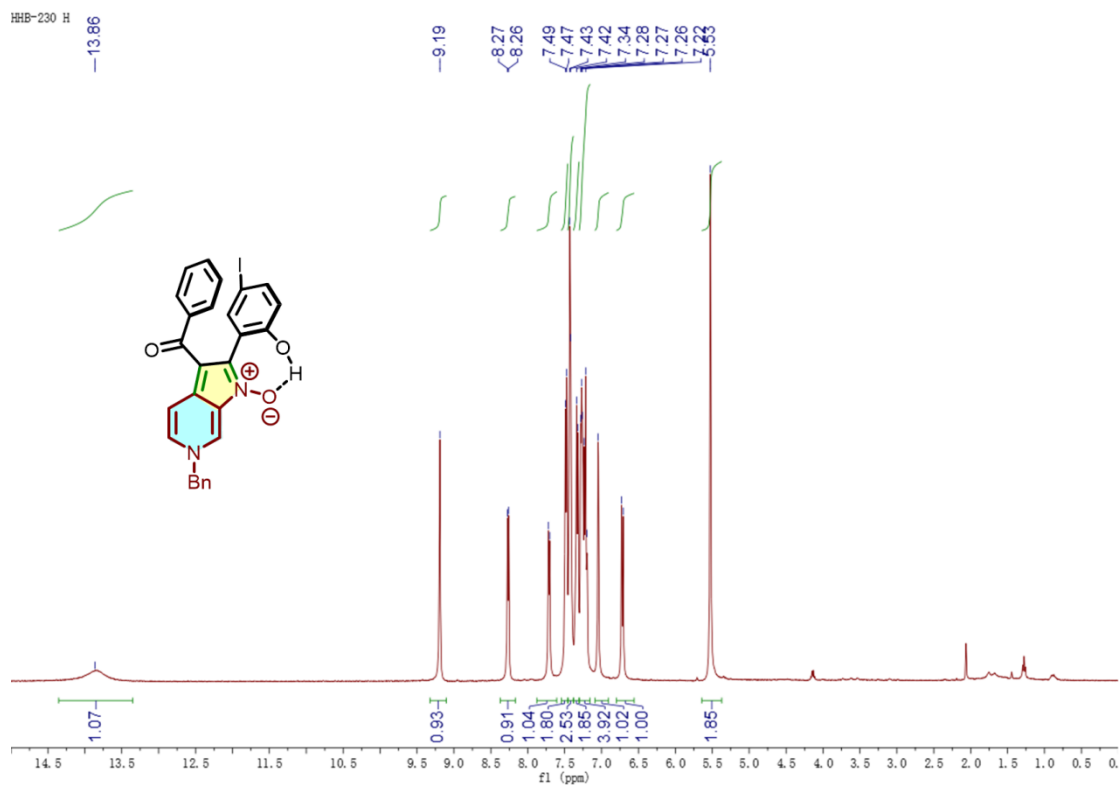

$^{13}\text{C}$  NMR spectrum of **3f** (100 MHz,  $\text{CDCl}_3$ )

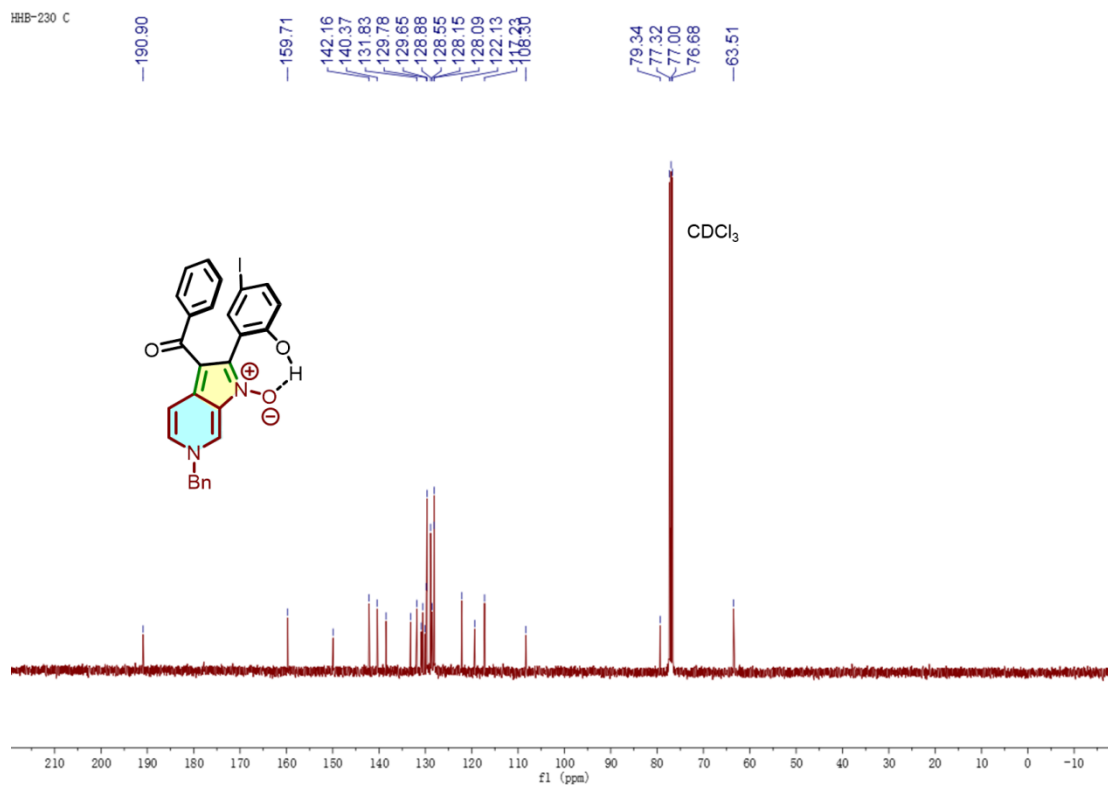

$^1\text{H}$  NMR spectrum of **3g** (300 MHz,  $\text{CDCl}_3$ )

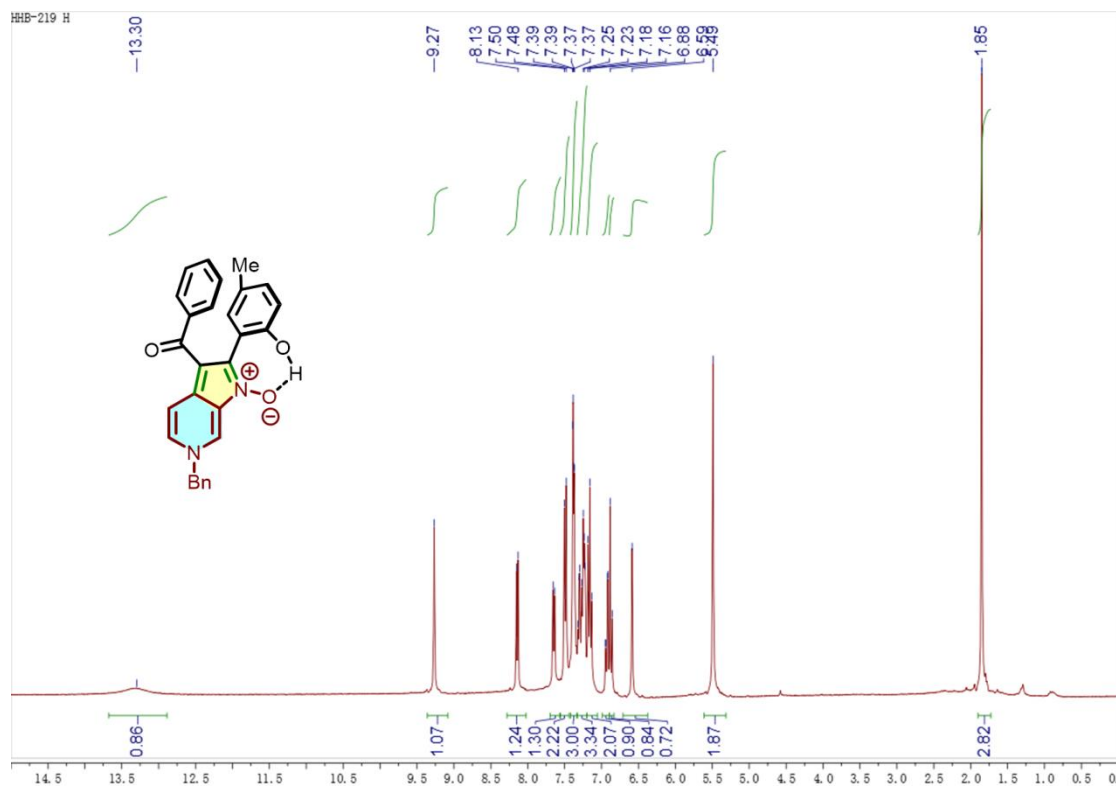

$^{13}\text{C}$  NMR spectrum of **3g** (75 MHz,  $\text{CDCl}_3$ )

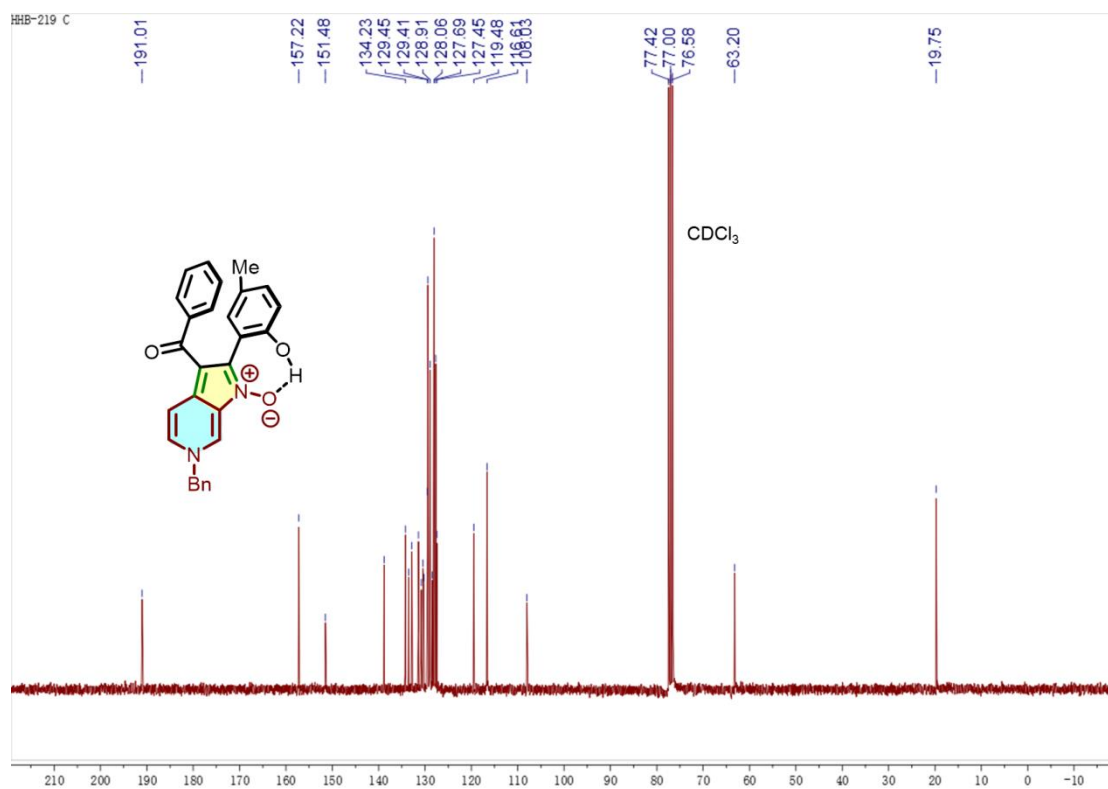

$^1\text{H}$  NMR spectrum of **3h** (300 MHz,  $\text{DMSO}-d_6$ )

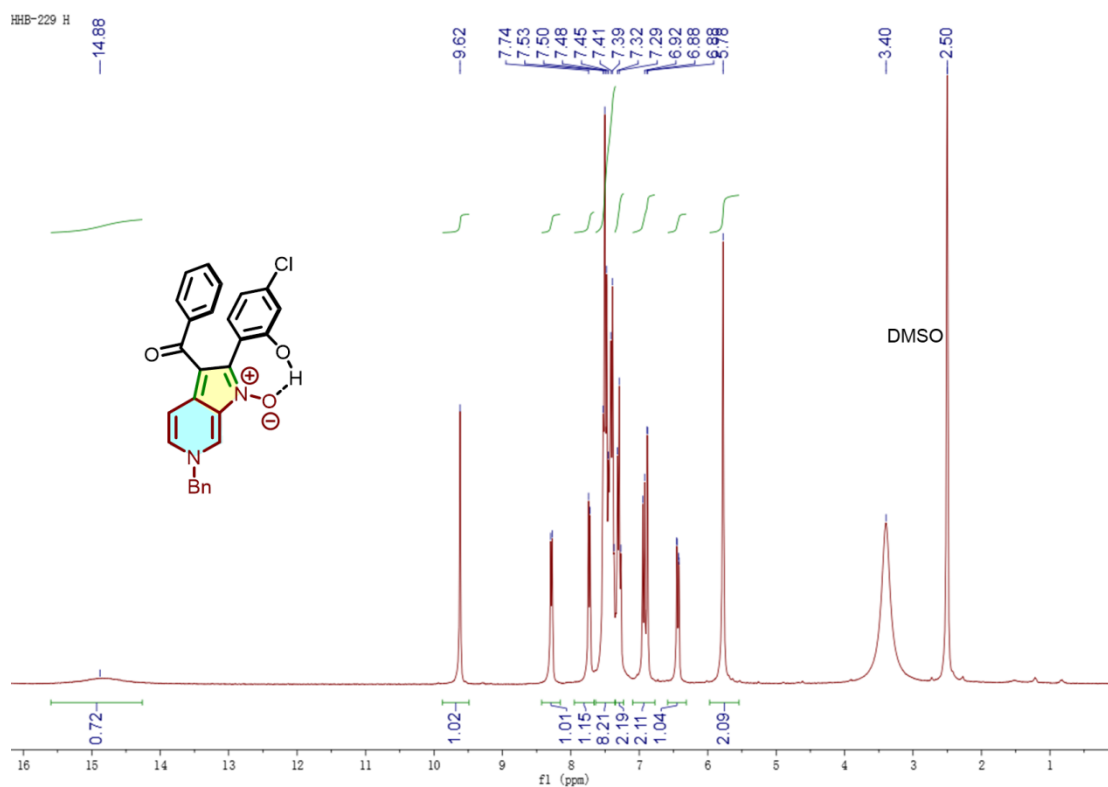

<sup>13</sup>C NMR spectrum of **3h** (100 MHz, DMSO-*d*<sub>6</sub>)

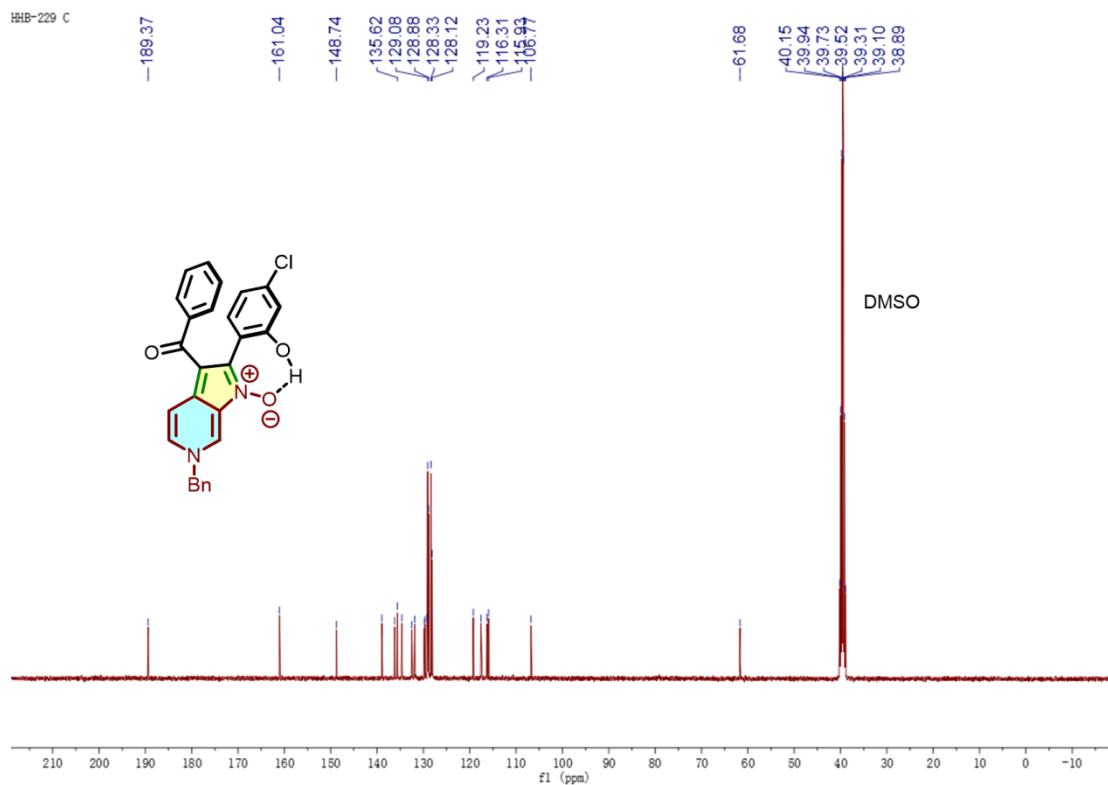

<sup>1</sup>H NMR spectrum of **3i** (400 MHz, CDCl<sub>3</sub>)

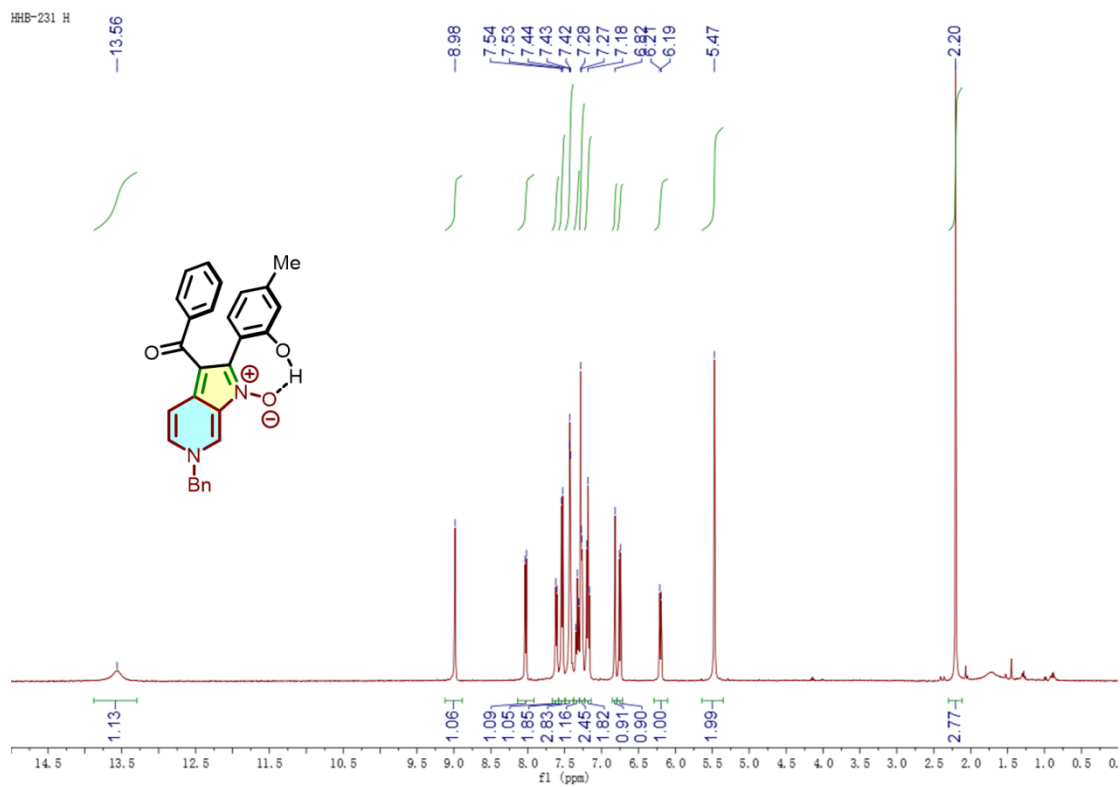



$^{13}\text{C}$  NMR spectrum of **3i** (100 MHz,  $\text{CDCl}_3$ )

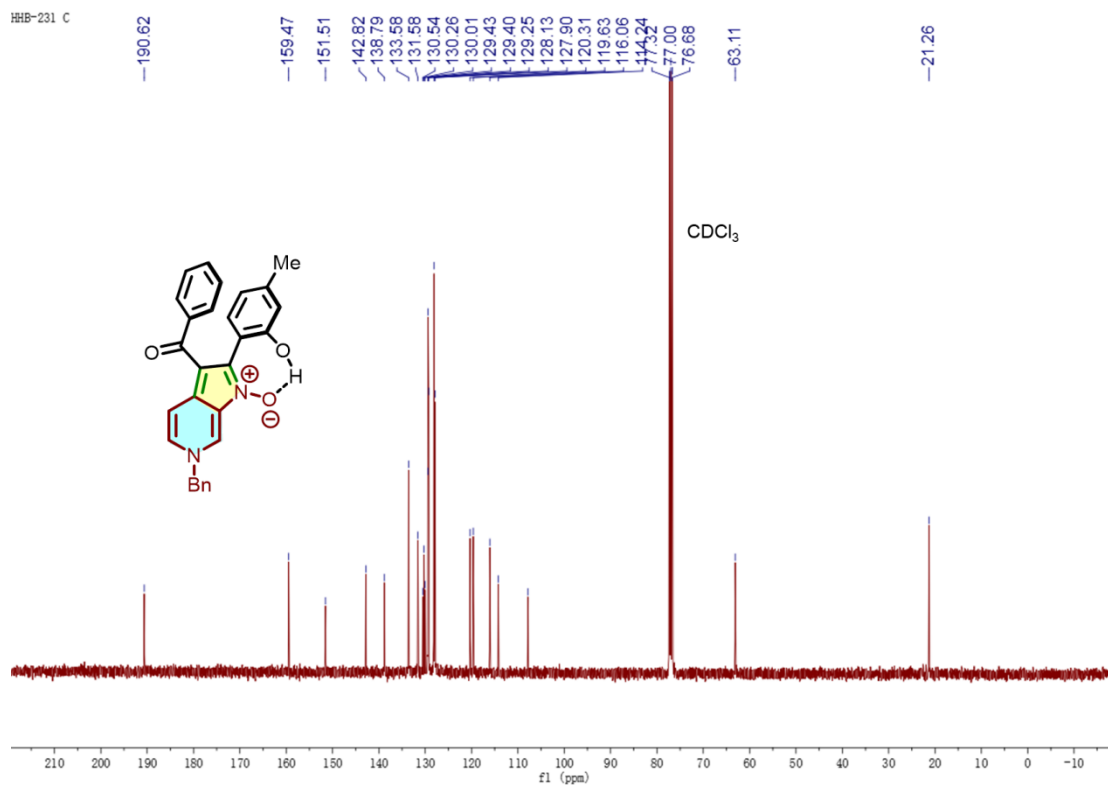

$^1\text{H}$  NMR spectrum of **3j** (300 MHz,  $\text{DMSO-}d_6$ )

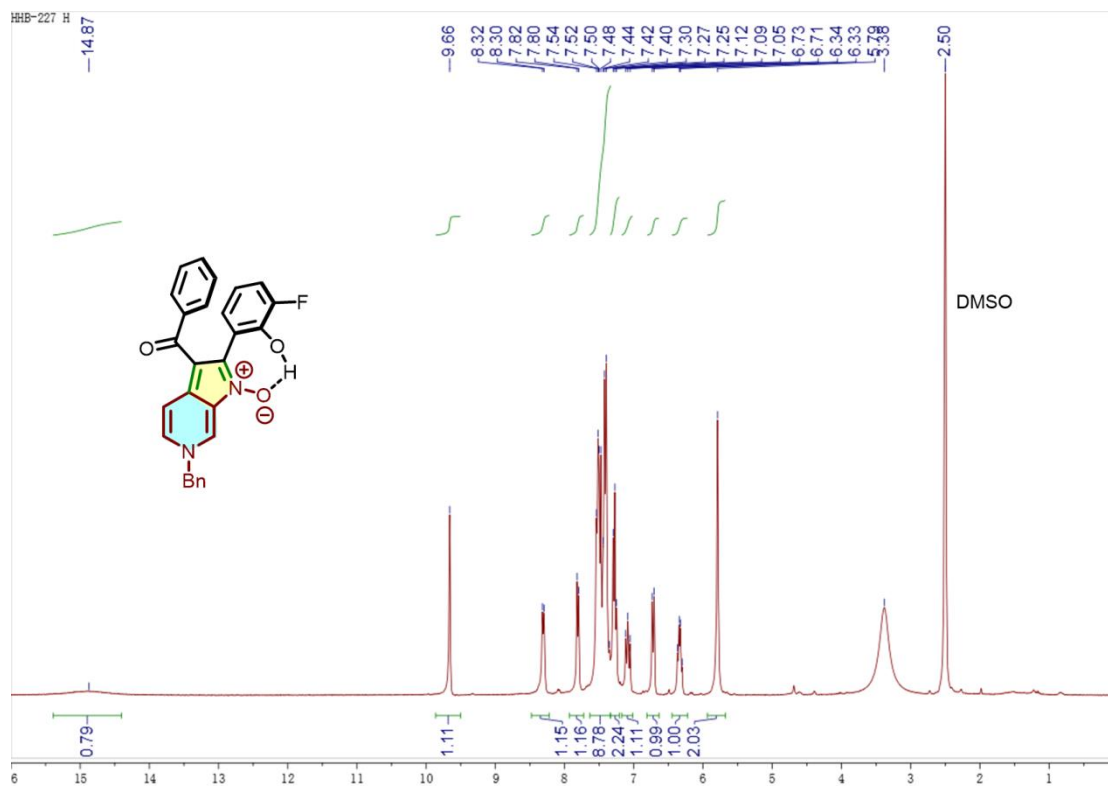

$^{13}\text{C}$  NMR spectrum of **3j** (100 MHz,  $\text{DMSO-}d_6$ )

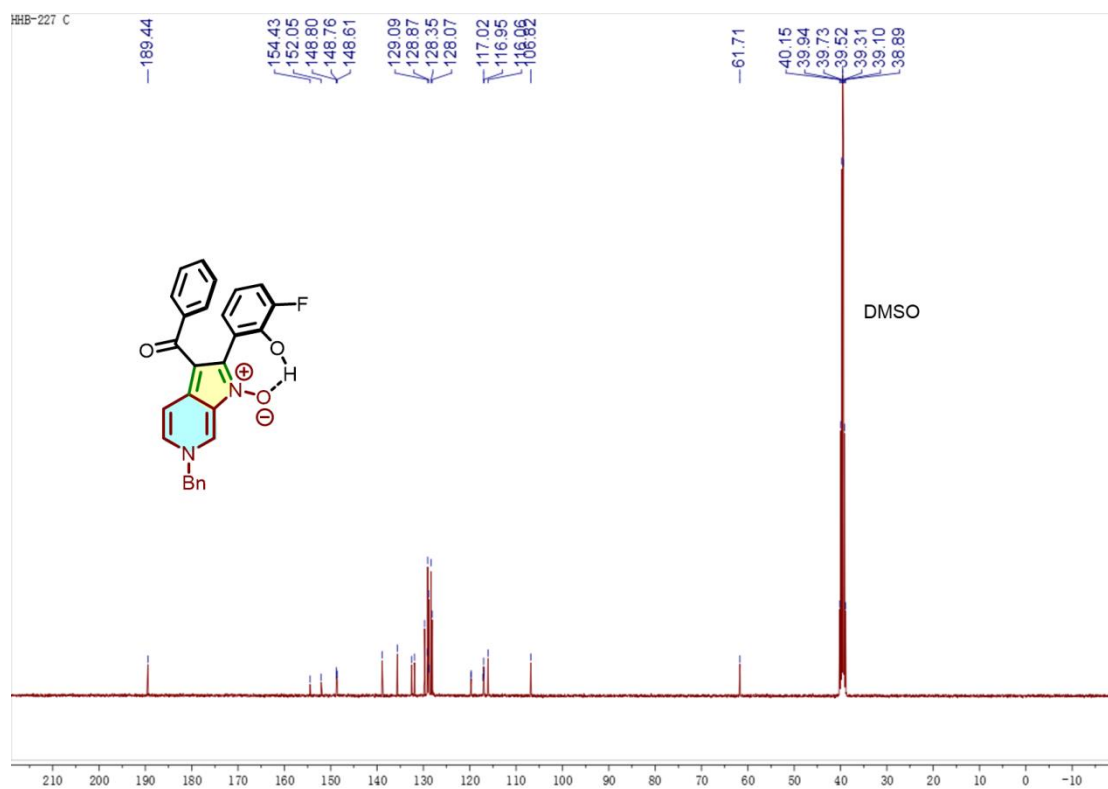

$^{19}\text{F}$  NMR spectrum of **3j** (376 MHz,  $\text{DMSO-}d_6$ )

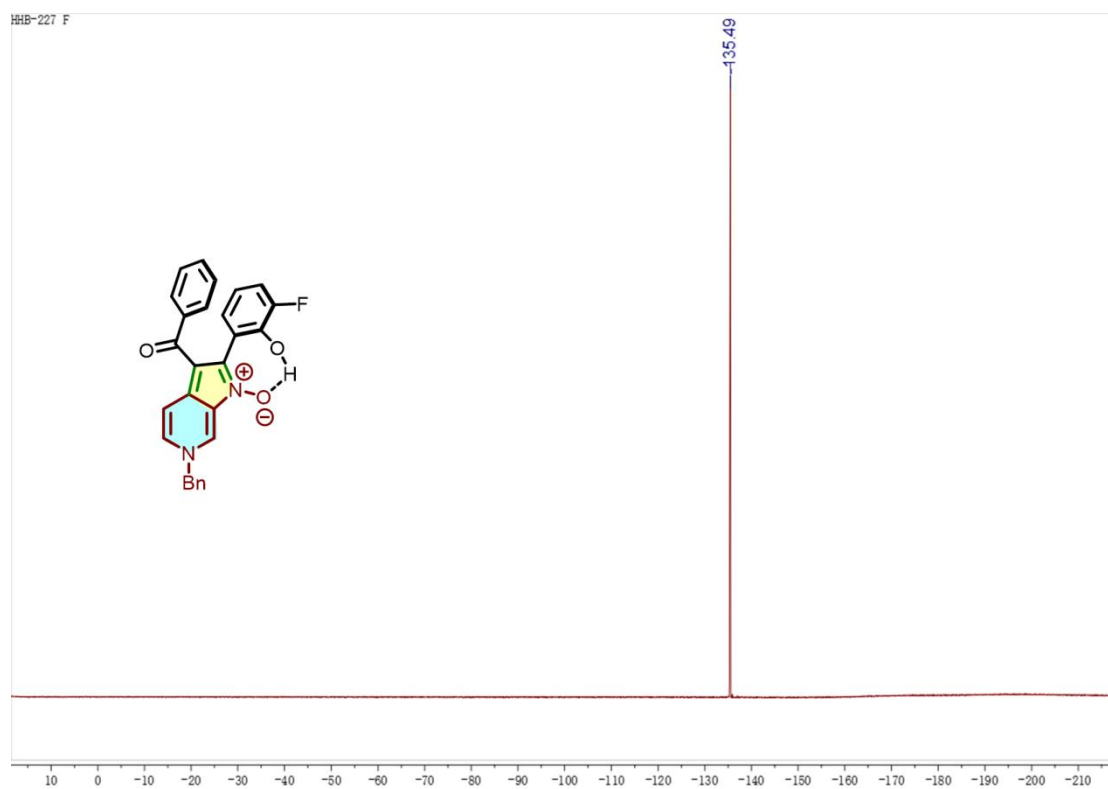

<sup>1</sup>H NMR spectrum of **3k** (300 MHz, DMSO-*d*<sub>6</sub>)

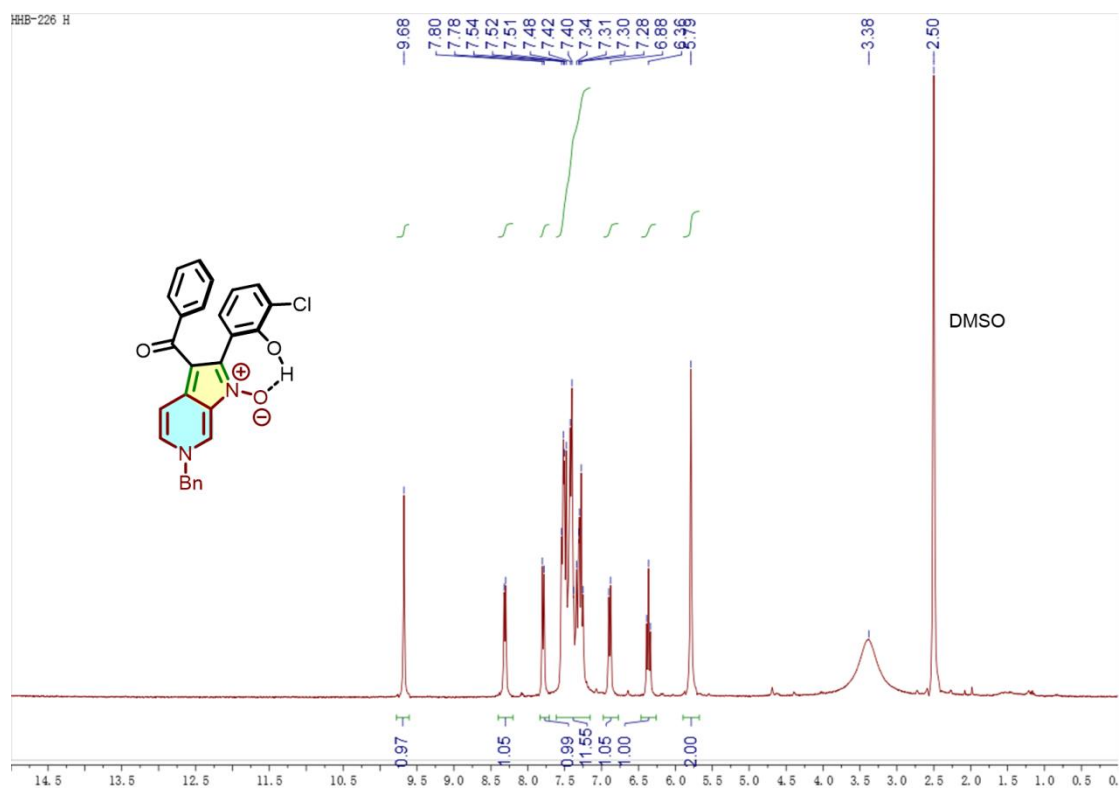

<sup>13</sup>C NMR spectrum of **3k** (100 MHz, DMSO-*d*<sub>6</sub>)

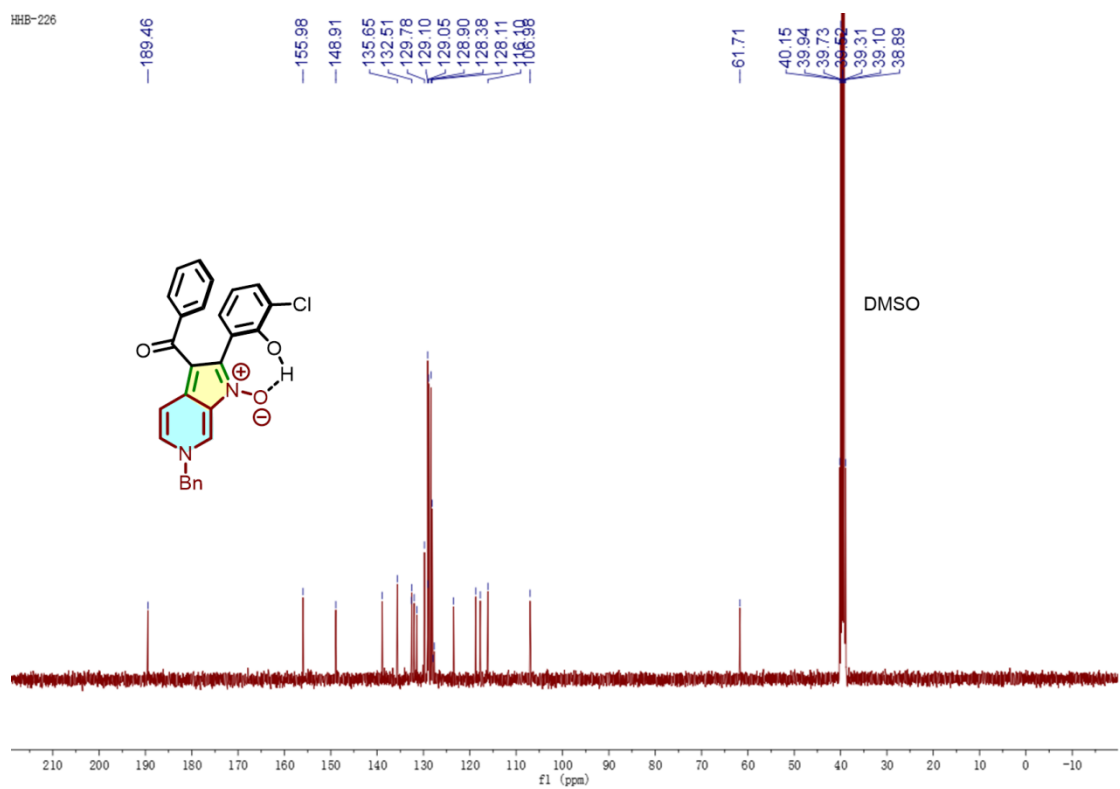

<sup>1</sup>H NMR spectrum of **31** (300 MHz, DMSO-*d*<sub>6</sub>)

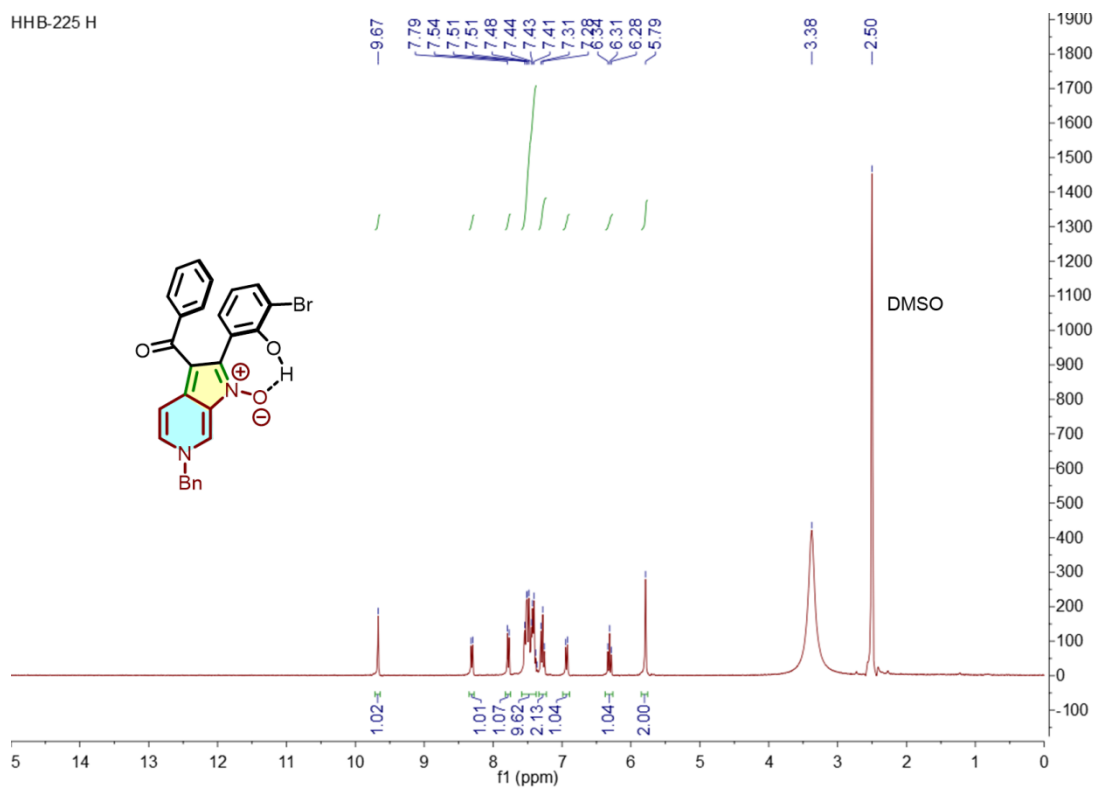

<sup>13</sup>C NMR spectrum of **31** (75 MHz, DMSO-*d*<sub>6</sub>)

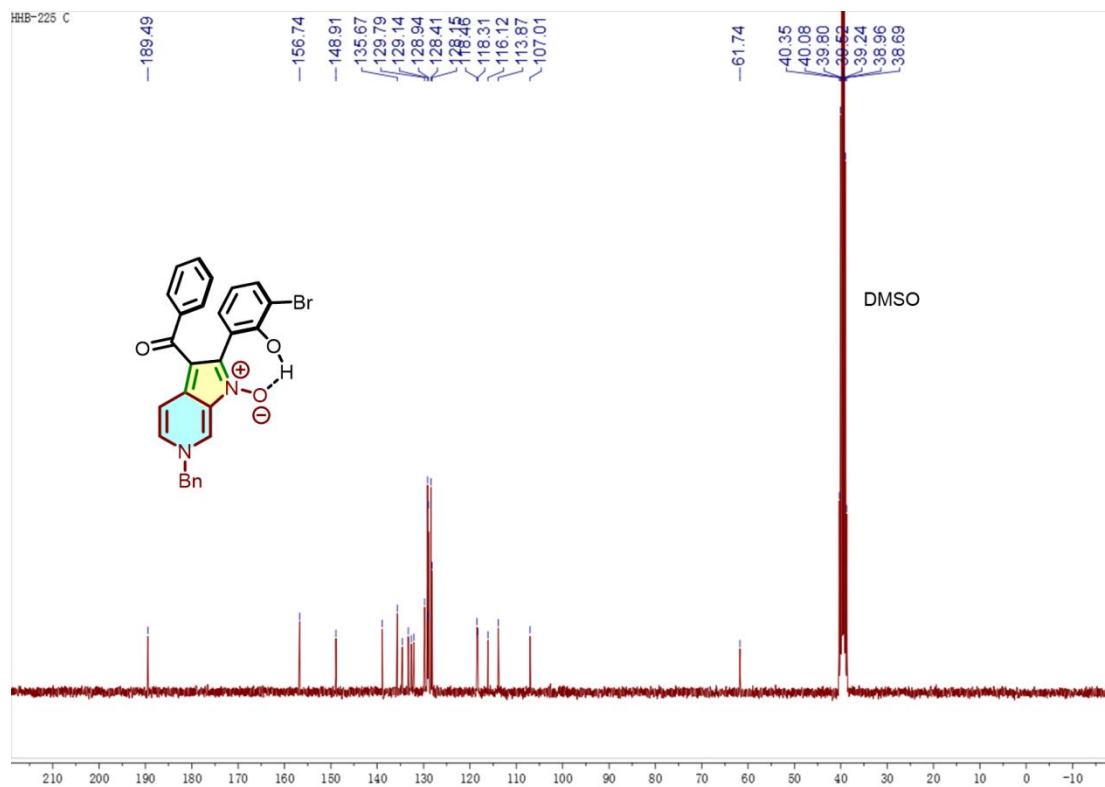

$^1\text{H}$  NMR spectrum of **3m** (300 MHz,  $\text{CDCl}_3$ )

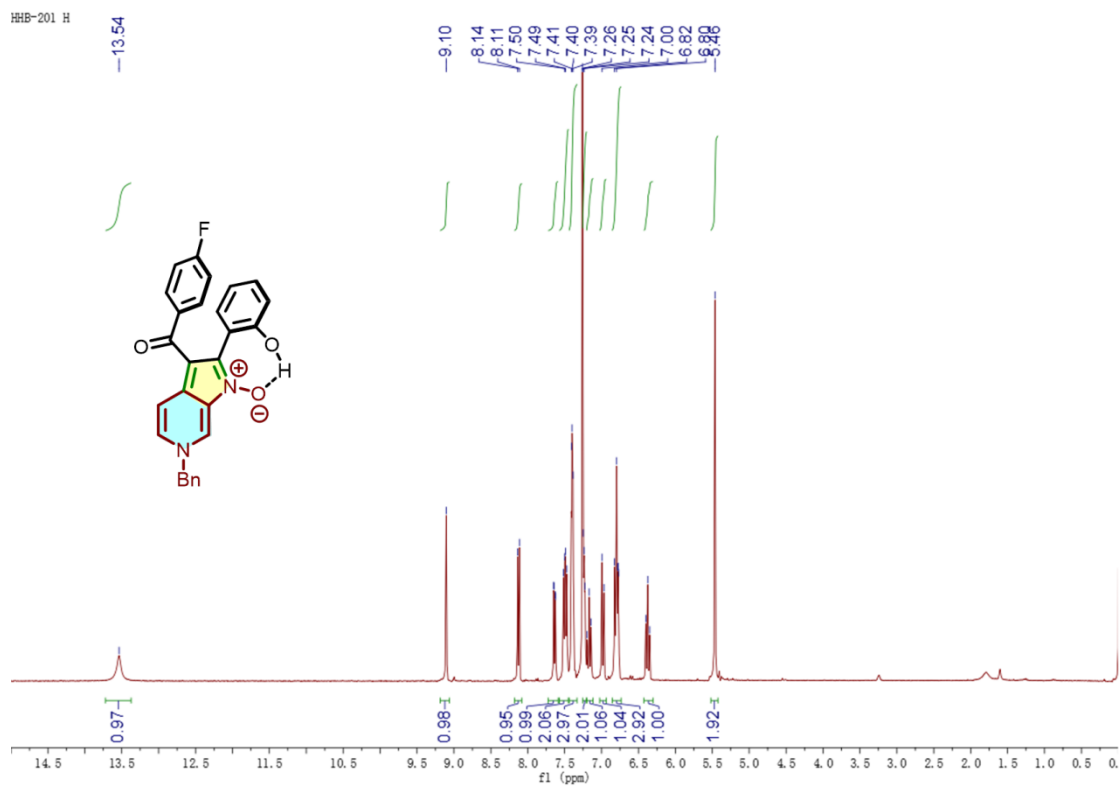

$^{13}\text{C}$  NMR spectrum of **3m** (75 MHz,  $\text{CDCl}_3$ )

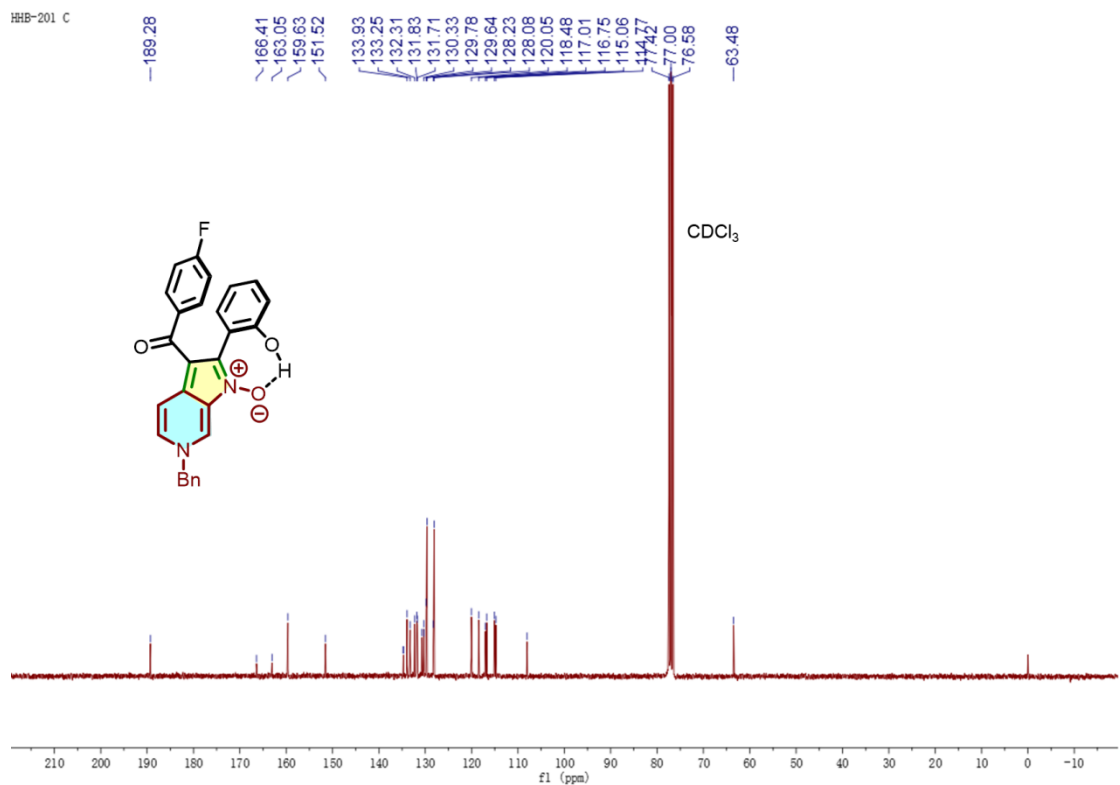

$^{19}\text{F}$  NMR spectrum of **3m** (376 MHz,  $\text{CDCl}_3$ )

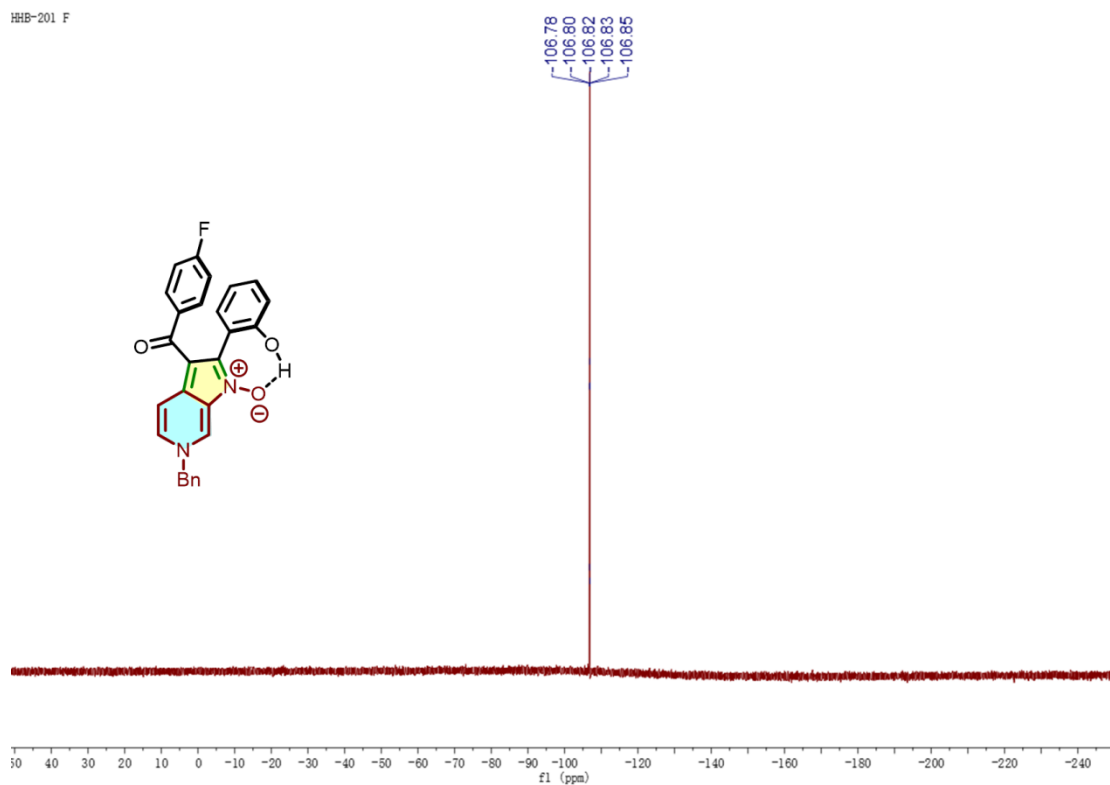

$^1\text{H}$  NMR spectrum of **3n** (300 MHz,  $\text{DMSO-}d_6$ )

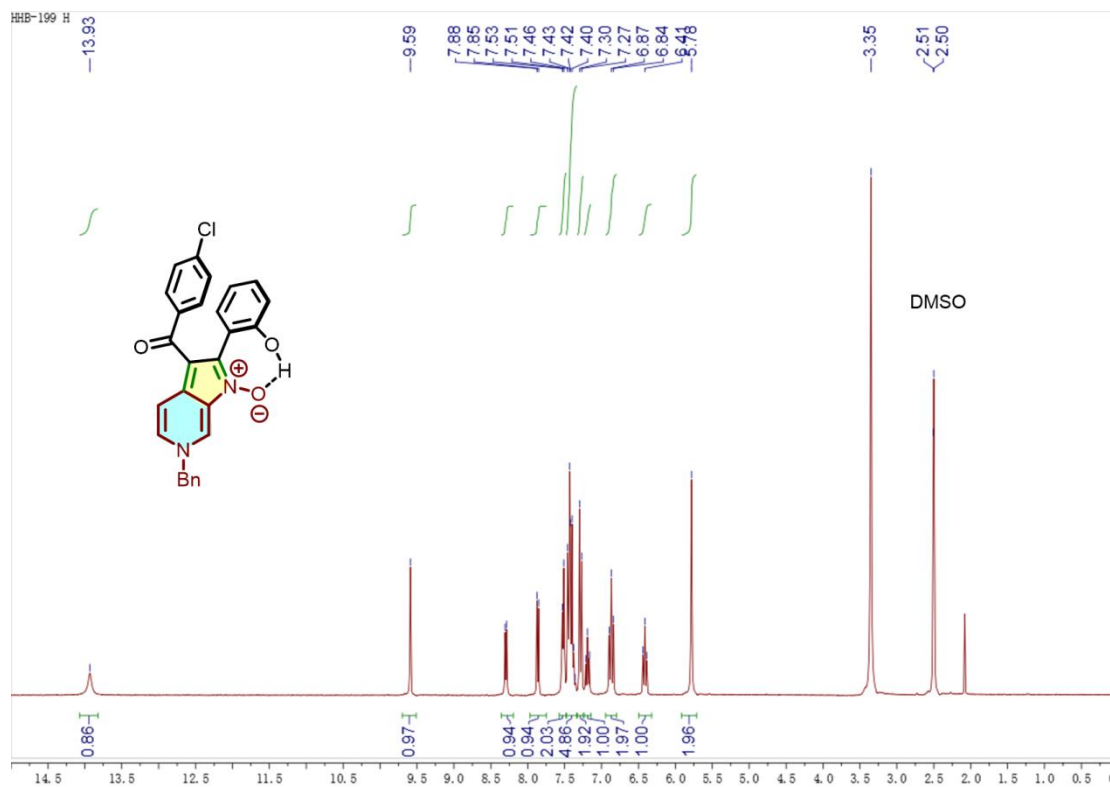

$^{13}\text{C}$  NMR spectrum of **3n** (75 MHz,  $\text{DMSO-}d_6$ )

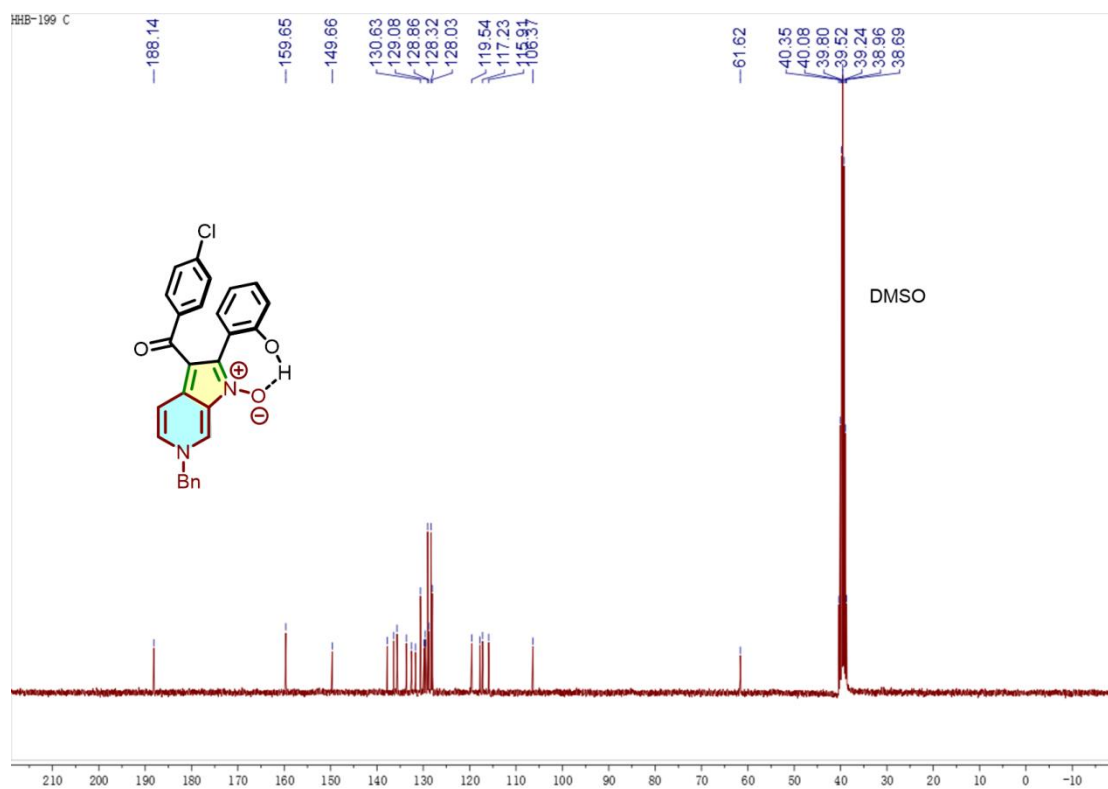

$^1\text{H}$  NMR spectrum of **3o** (300 MHz,  $\text{CDCl}_3$ )

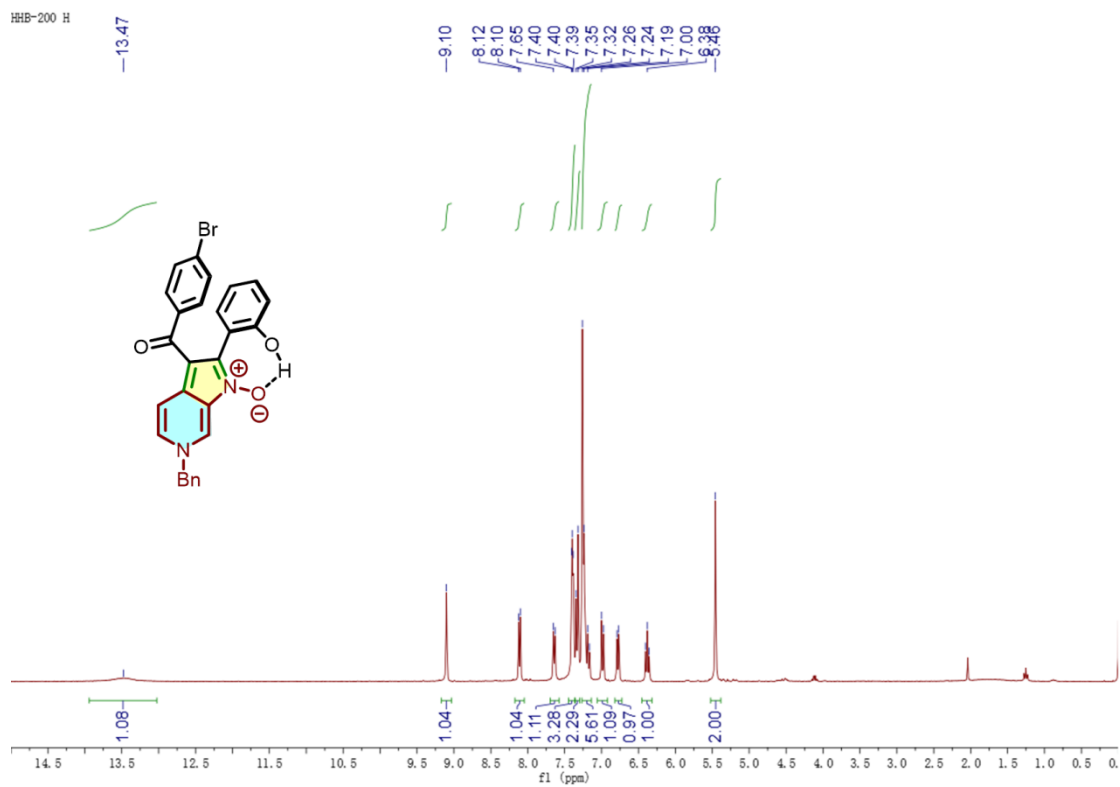

$^{13}\text{C}$  NMR spectrum of **3o** (75 MHz,  $\text{CDCl}_3$ )

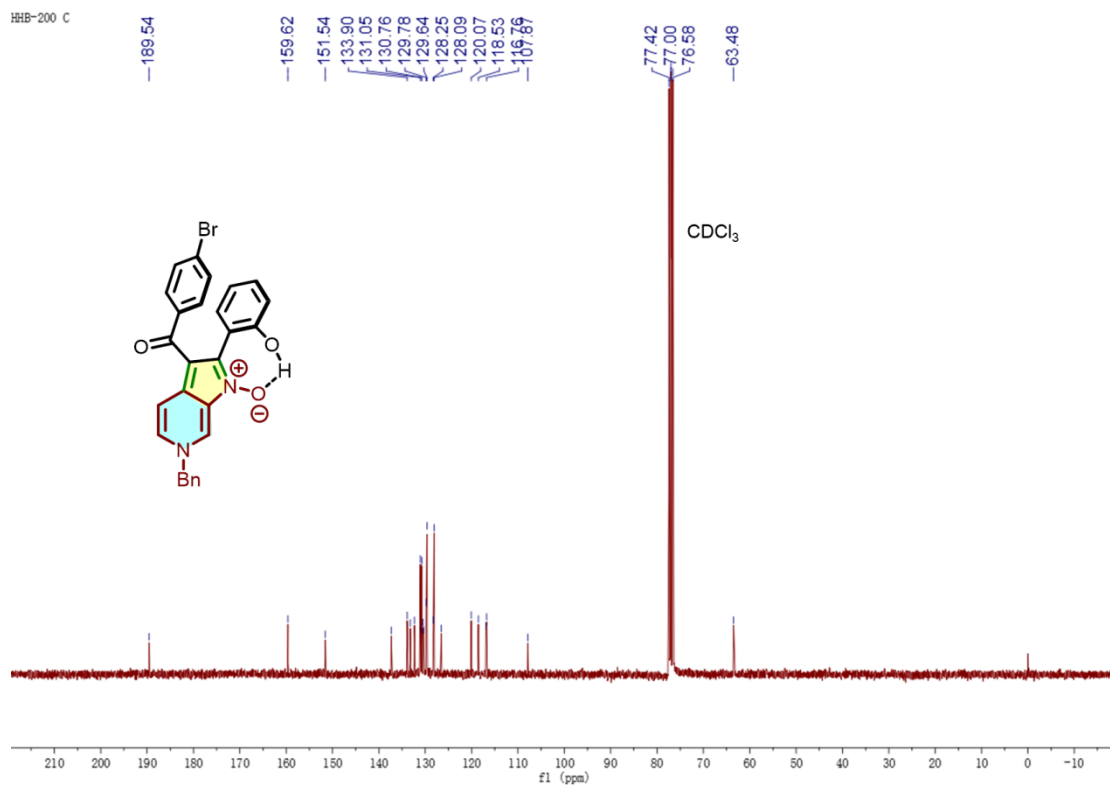

$^1\text{H}$  NMR spectrum of **3p** (300 MHz,  $\text{CDCl}_3$ )

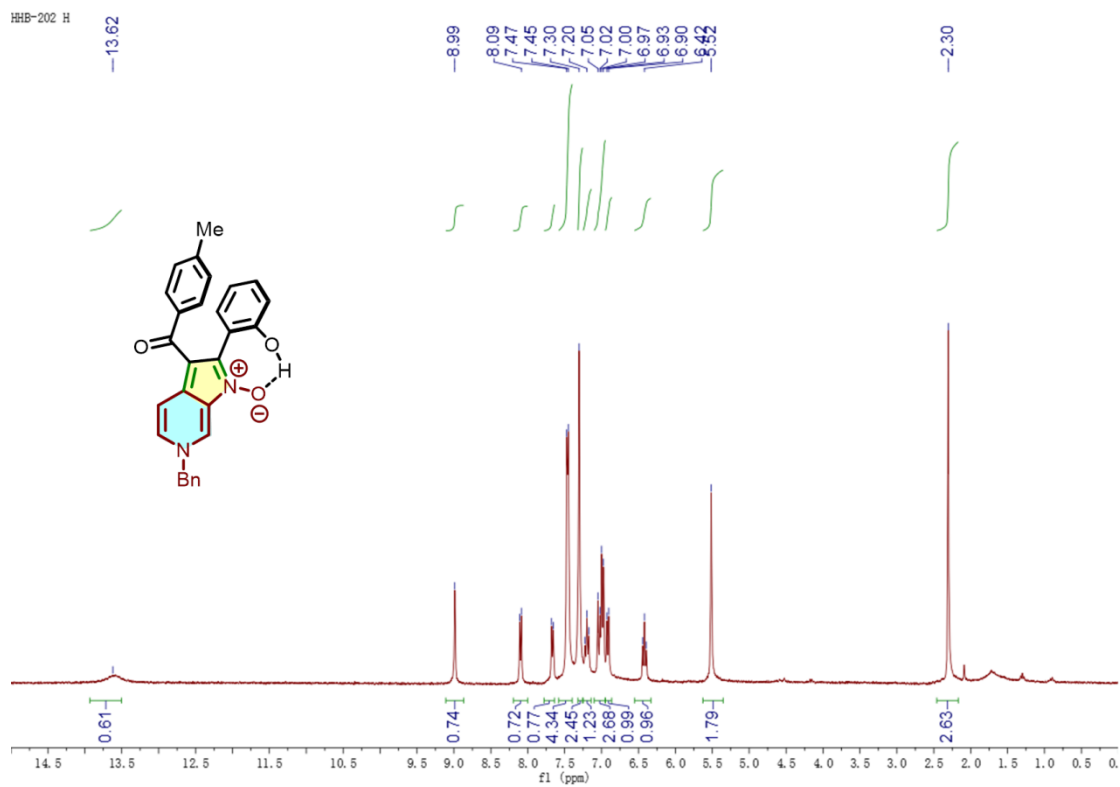



$^{13}\text{C}$  NMR spectrum of **3p** (75 MHz,  $\text{CDCl}_3$ )

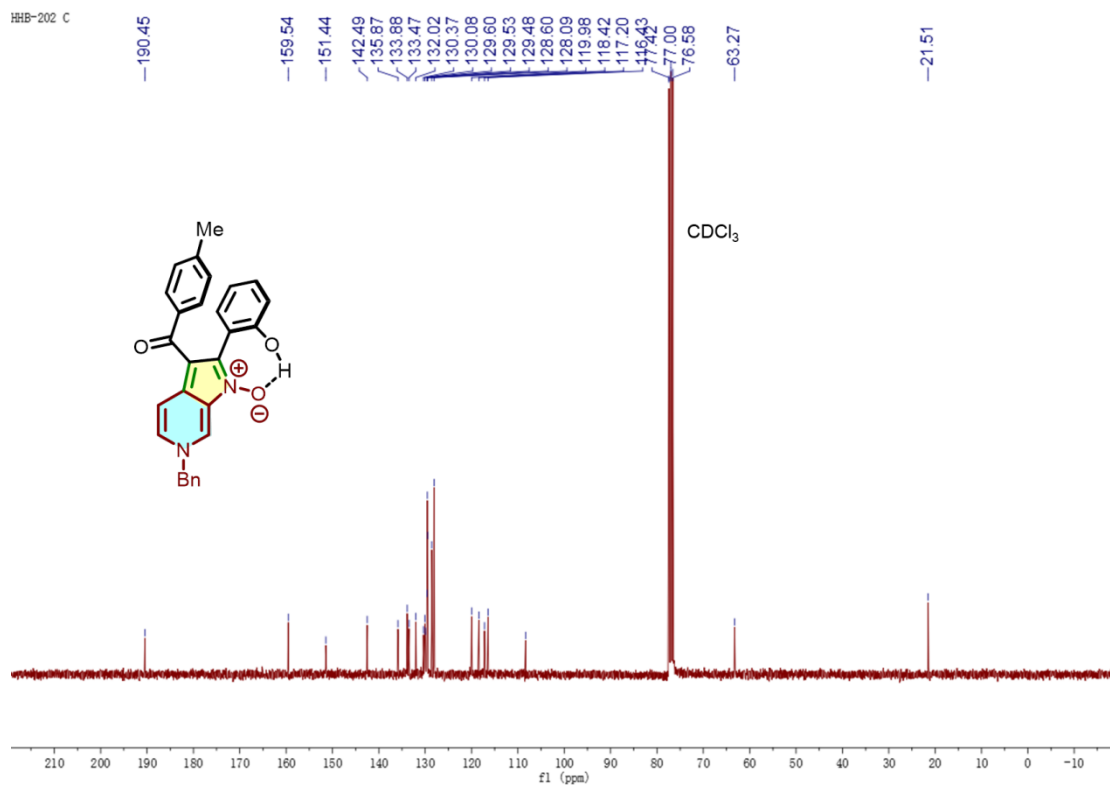

$^1\text{H}$  NMR spectrum of **3q** (300 MHz,  $\text{CDCl}_3$ )

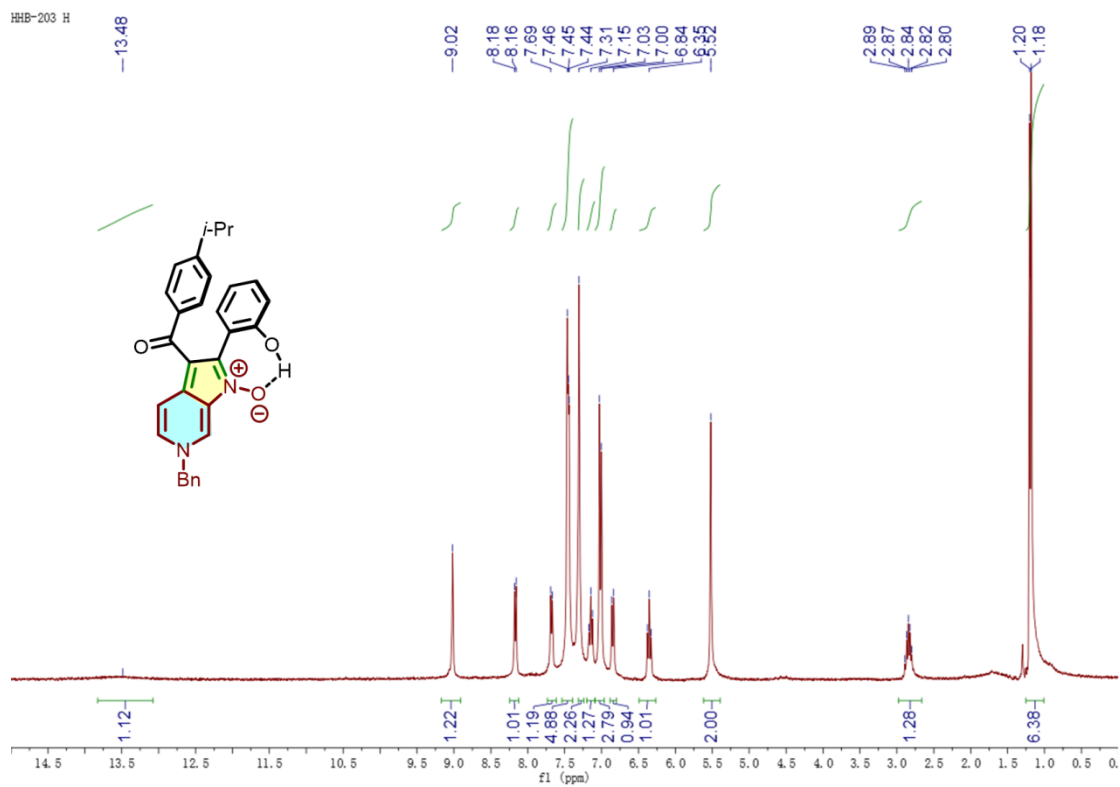

$^{13}\text{C}$  NMR spectrum of **3q** (75 MHz,  $\text{CDCl}_3$ )

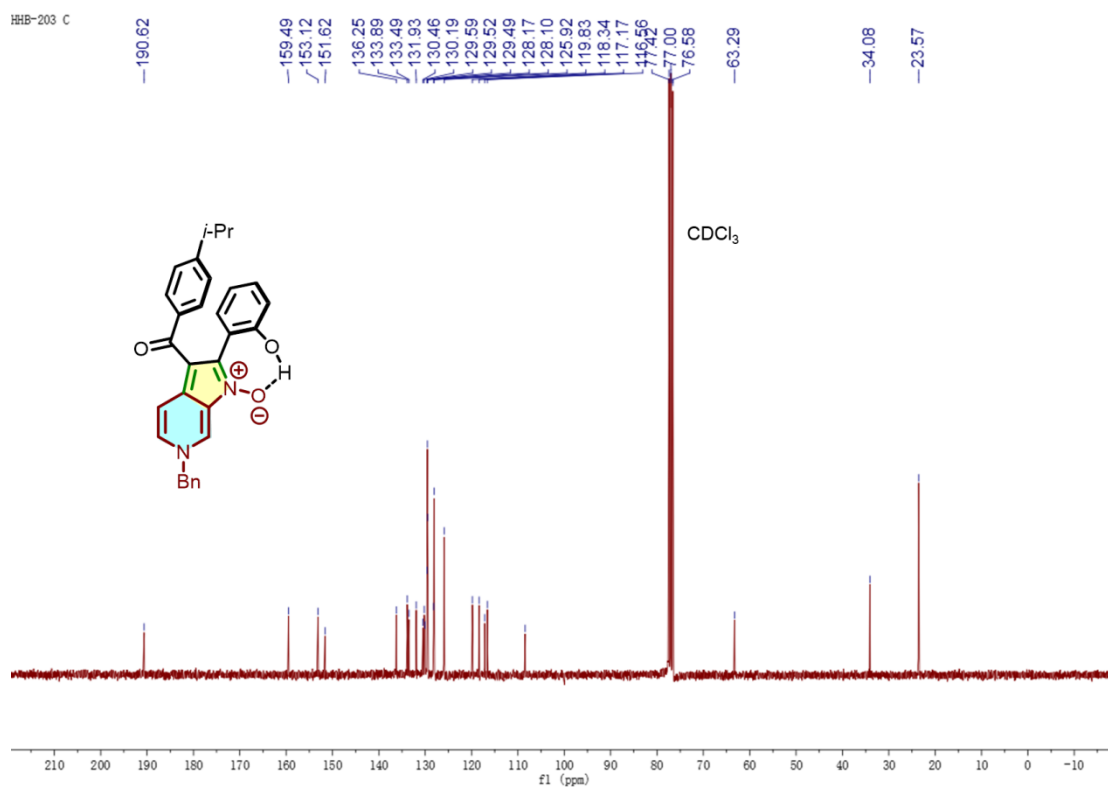

$^1\text{H}$  NMR spectrum of **3r** (400 MHz,  $\text{DMSO}-d_6$ )

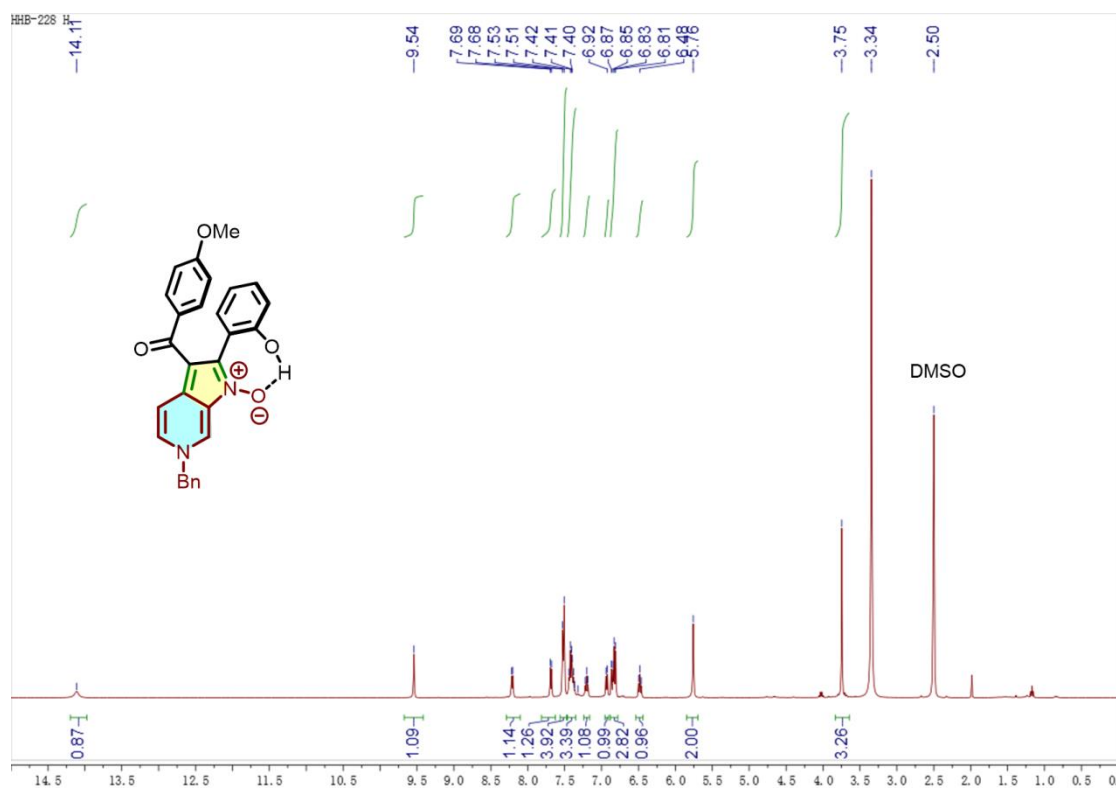

$^{13}\text{C}$  NMR spectrum of **3r** (100 MHz,  $\text{DMSO-}d_6$ )

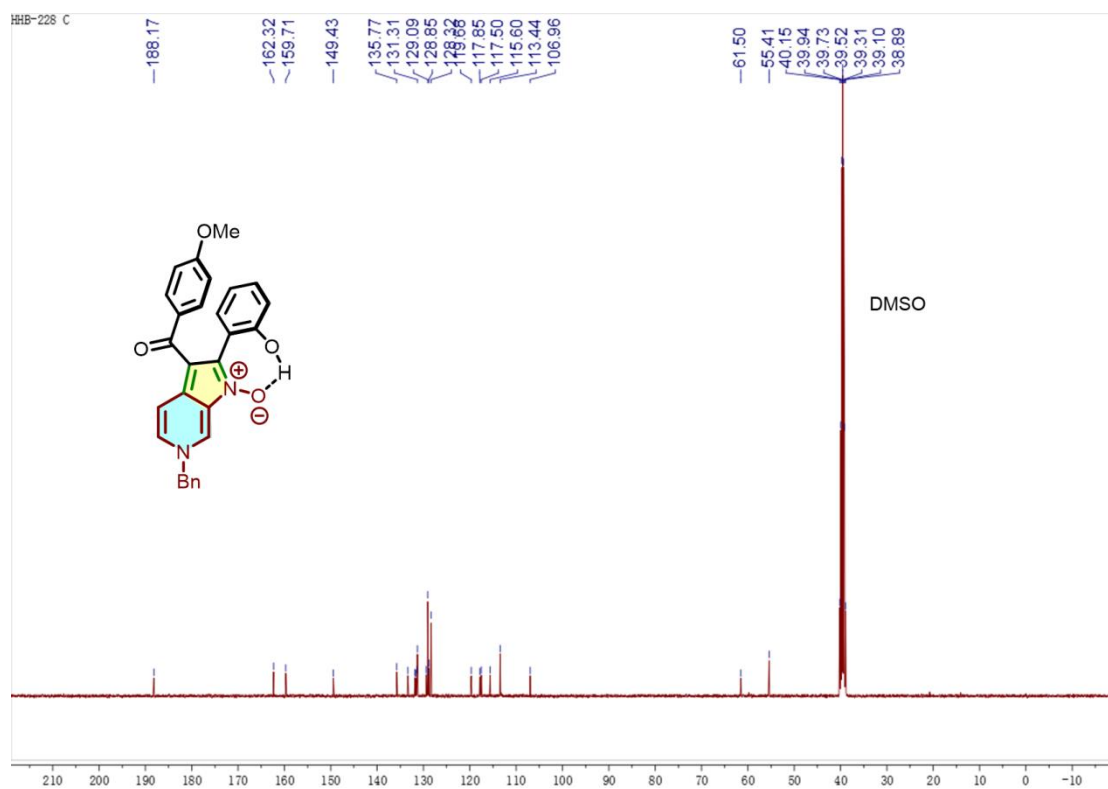

$^1\text{H}$  NMR spectrum of **3s** (300 MHz,  $\text{CDCl}_3$ )

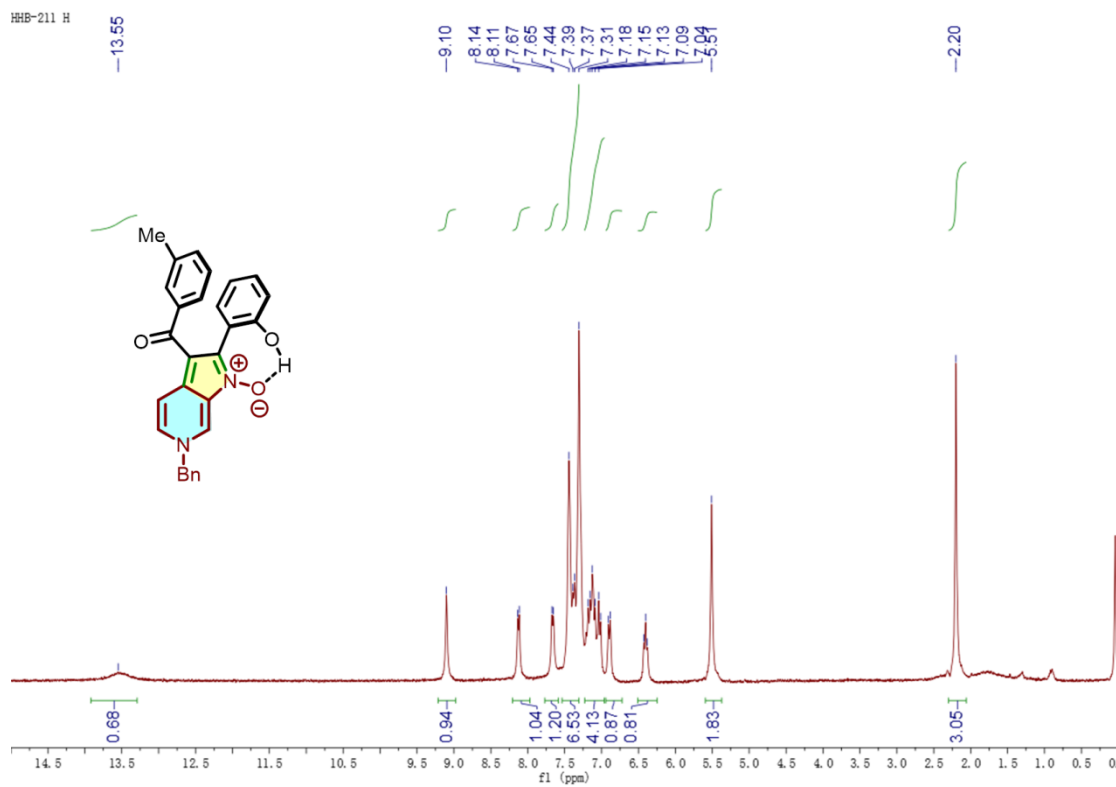

$^{13}\text{C}$  NMR spectrum of **3s** (75 MHz,  $\text{CDCl}_3$ )

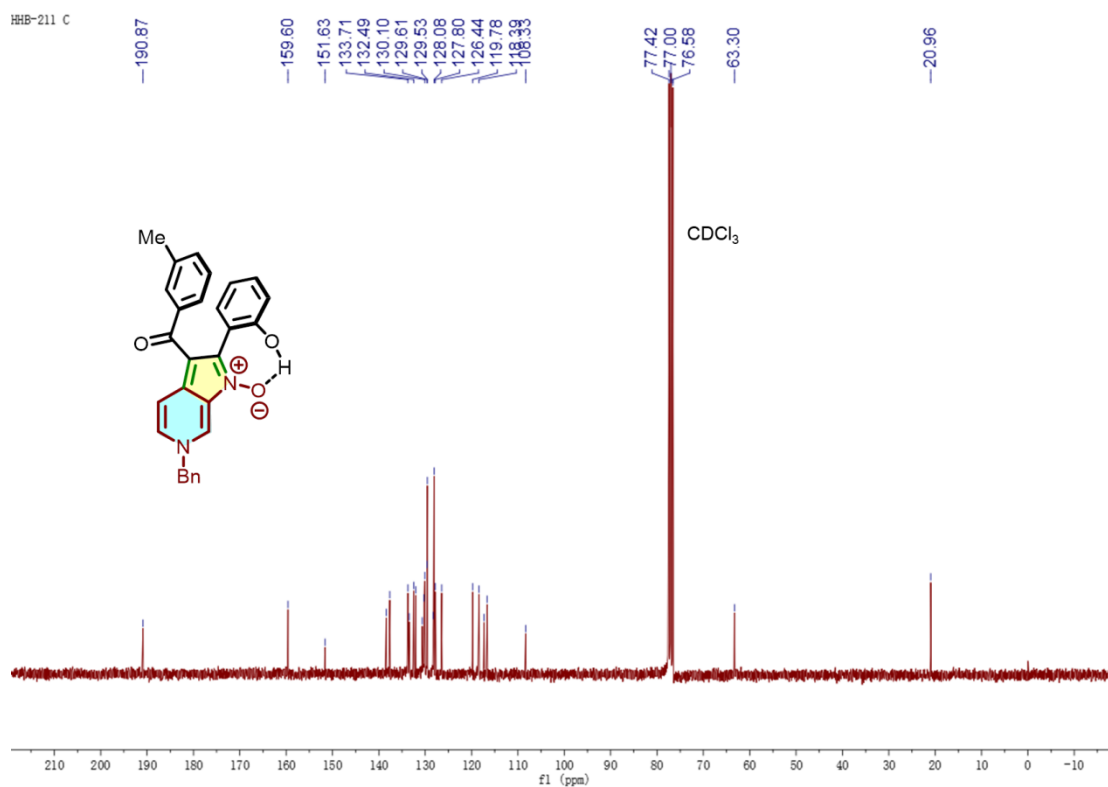

$^1\text{H}$  NMR spectrum of **3t** (300 MHz,  $\text{CDCl}_3$ )

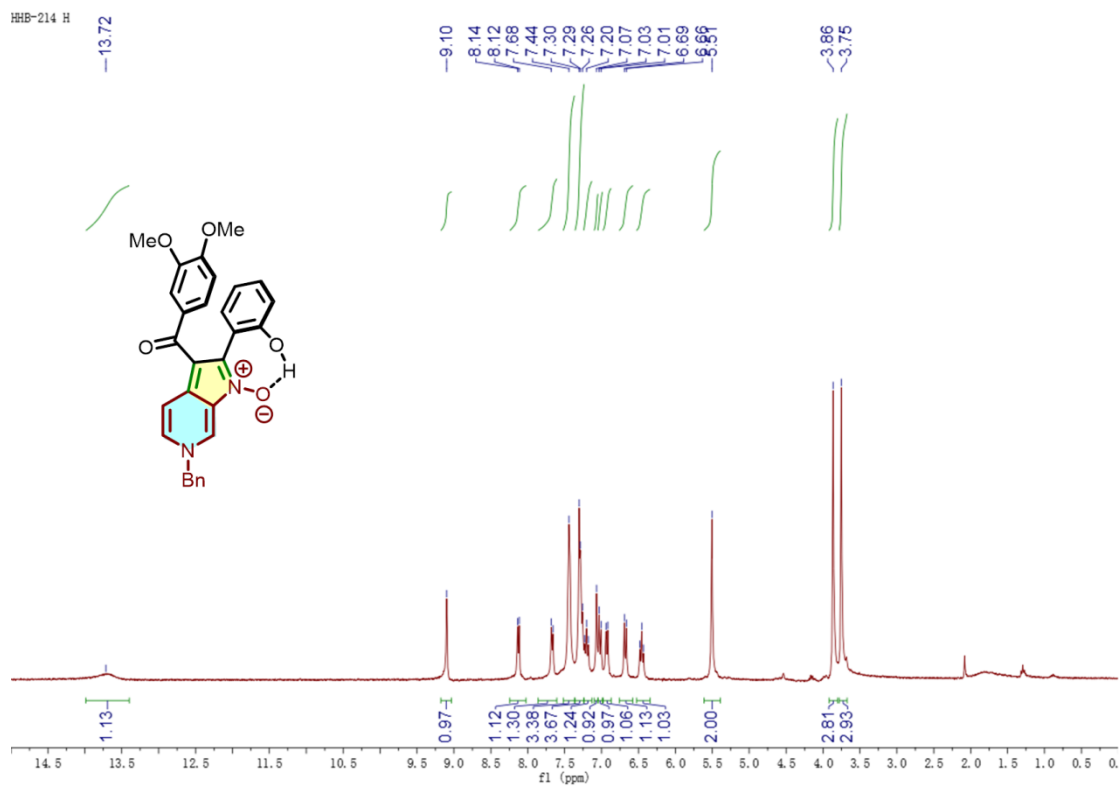

<sup>13</sup>C NMR spectrum of **3t** (75 MHz, CDCl<sub>3</sub>)

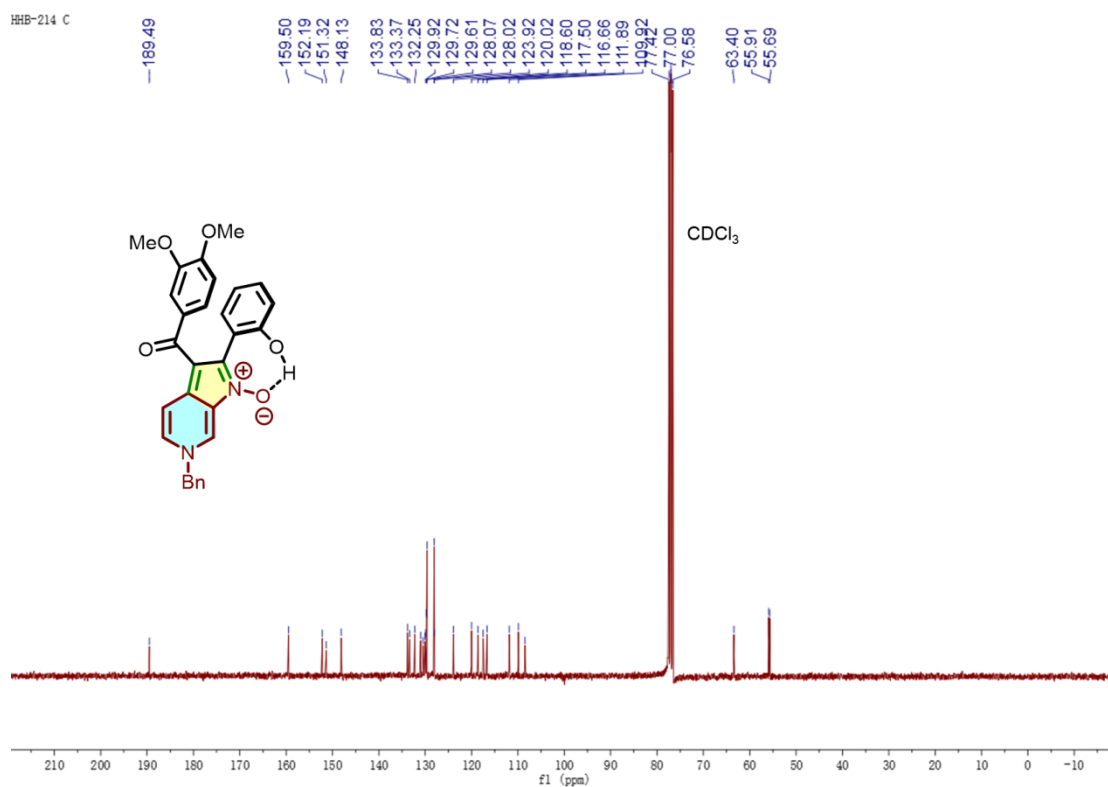

<sup>1</sup>H NMR spectrum of **3u** (300 MHz, DMSO-*d*<sub>6</sub>)

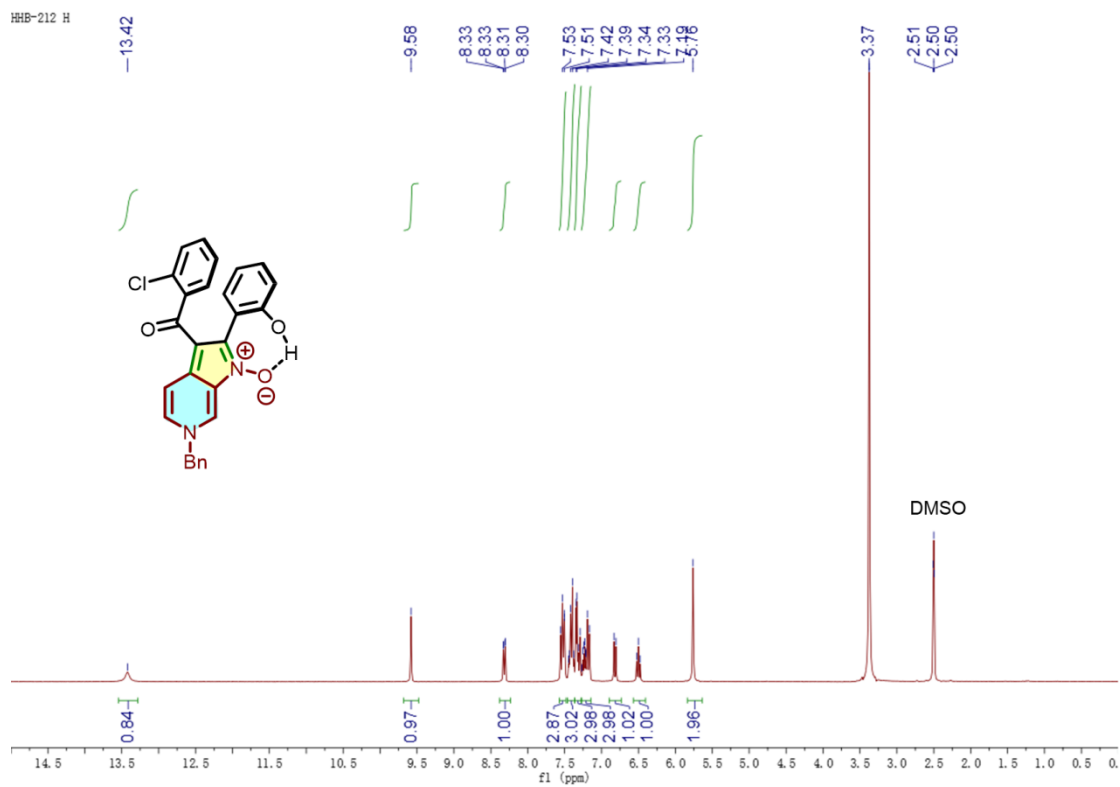

<sup>13</sup>C NMR spectrum of **3u** (75 MHz, DMSO-*d*<sub>6</sub>)

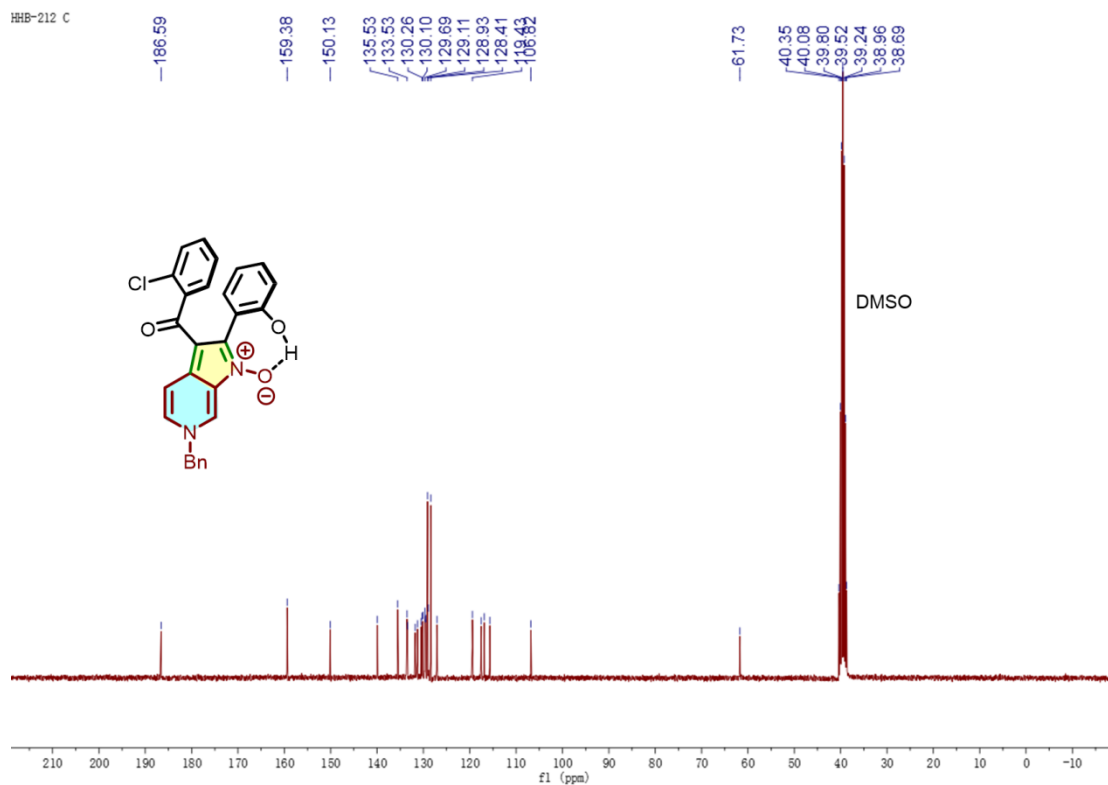

<sup>1</sup>H NMR spectrum of **3v** (300 MHz, CDCl<sub>3</sub>)

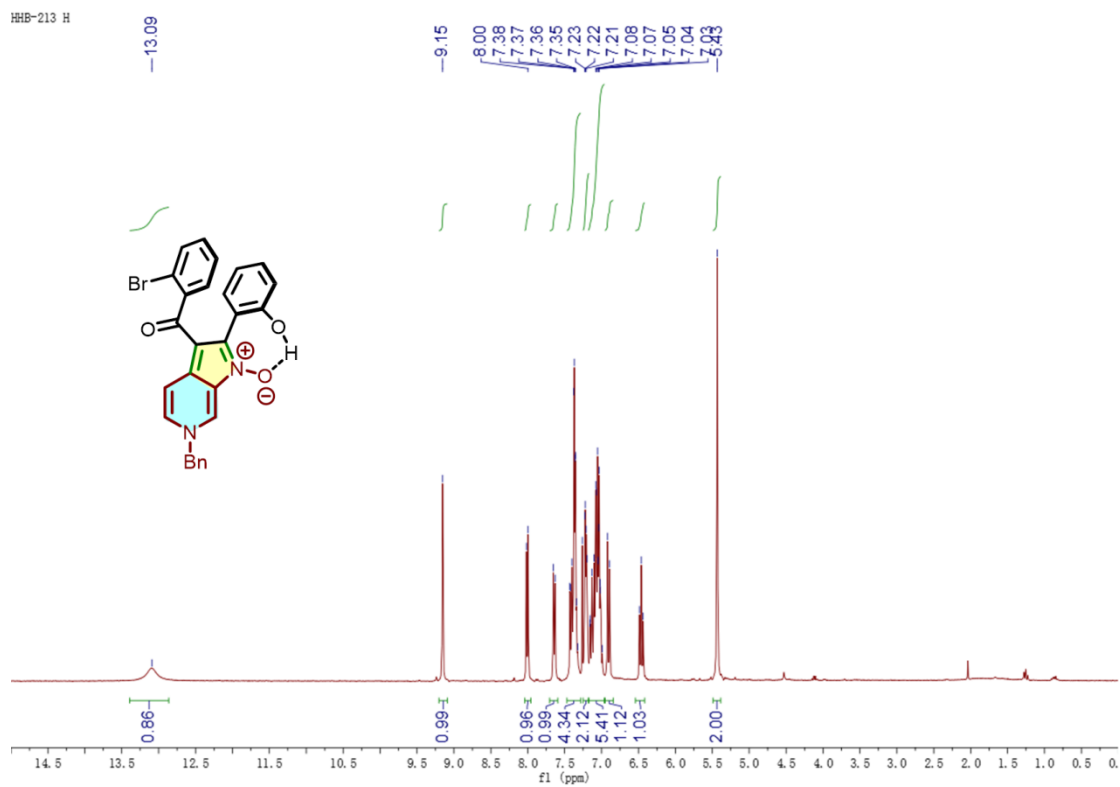

$^{13}\text{C}$  NMR spectrum of **3v** (75 MHz,  $\text{CDCl}_3$ )

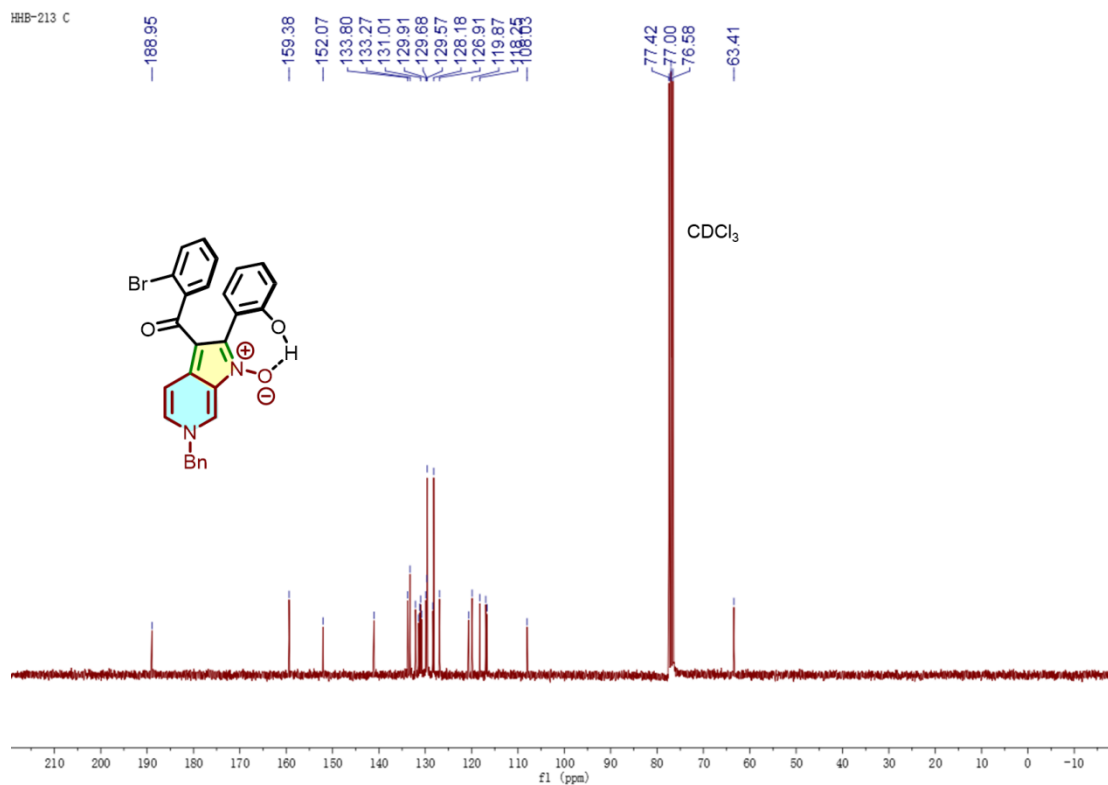

$^1\text{H}$  NMR spectrum of **3w** (300 MHz,  $\text{CDCl}_3$ )

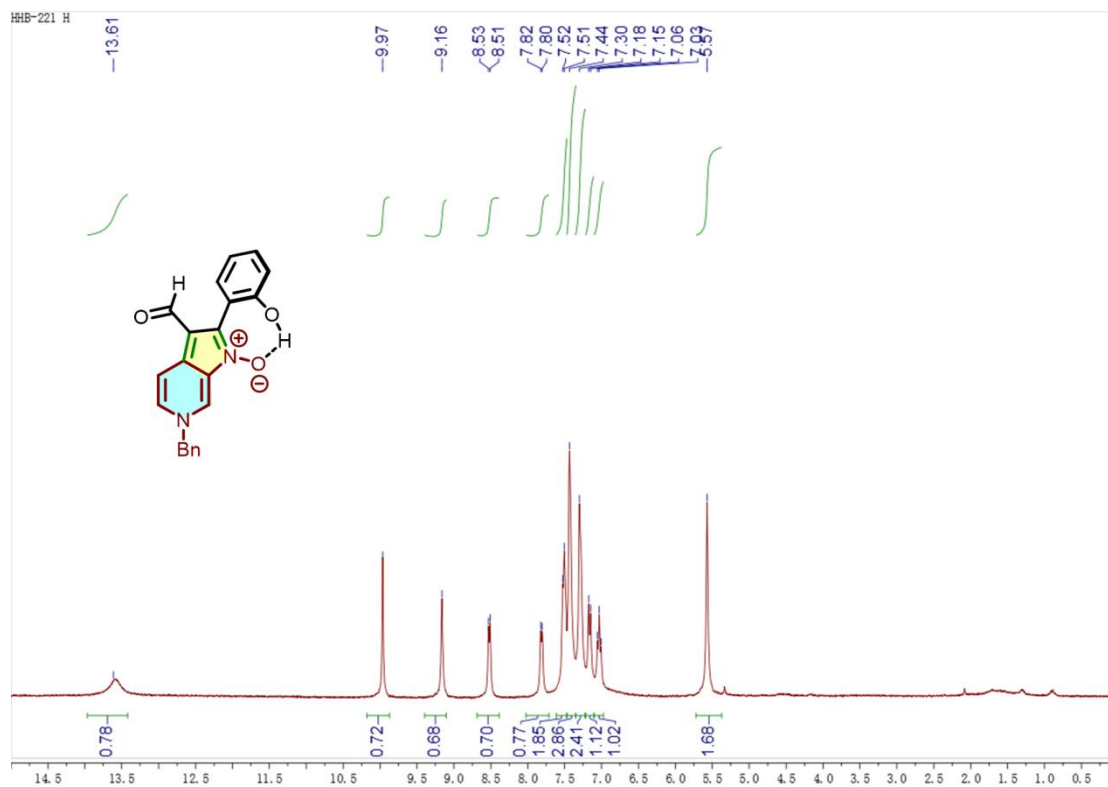

$^{13}\text{C}$  NMR spectrum of **3w** (75 MHz,  $\text{CDCl}_3$ )

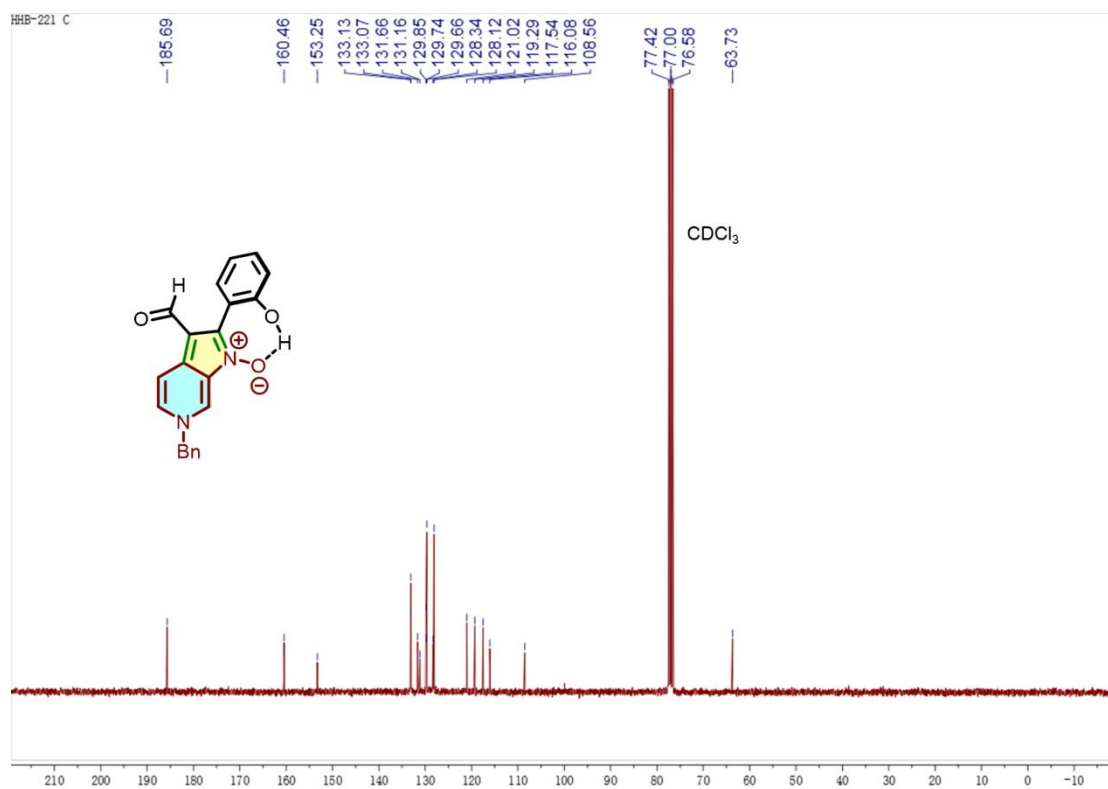

$^1\text{H}$  NMR spectrum of **4** (400 MHz,  $\text{DMSO-}d_6$ )

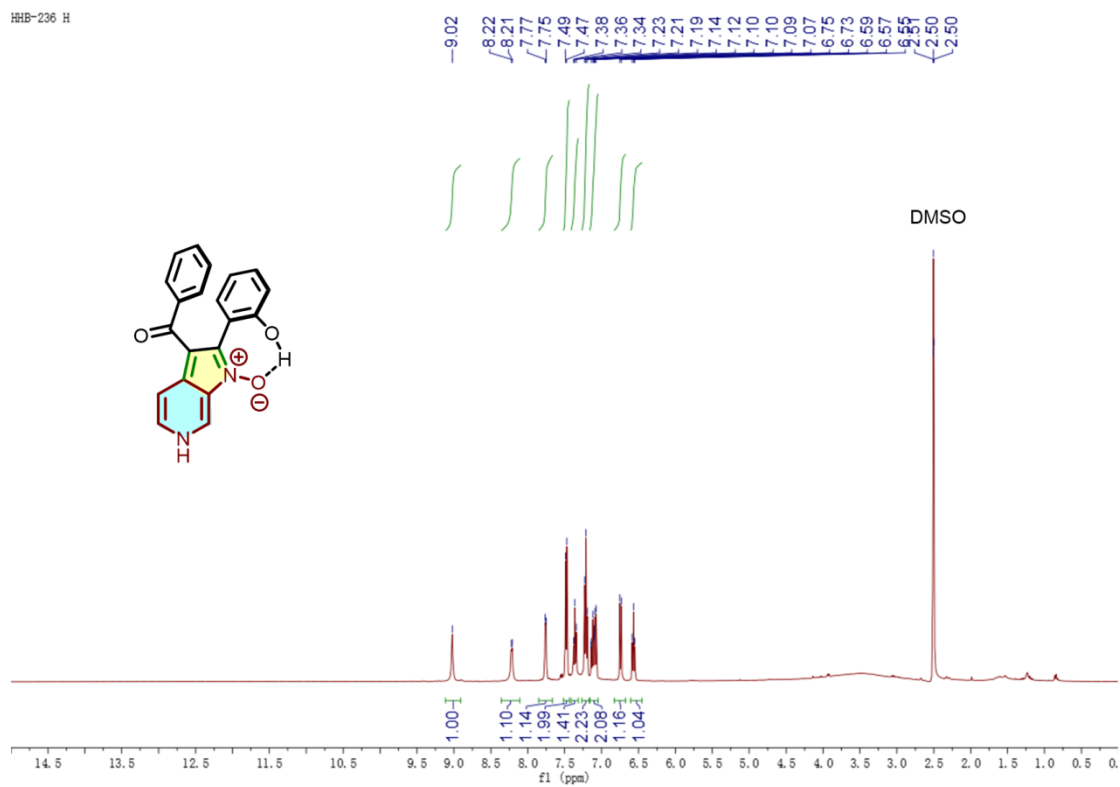



$^{13}\text{C}$  NMR spectrum of **4** (100 MHz,  $\text{DMSO-}d_6$ )

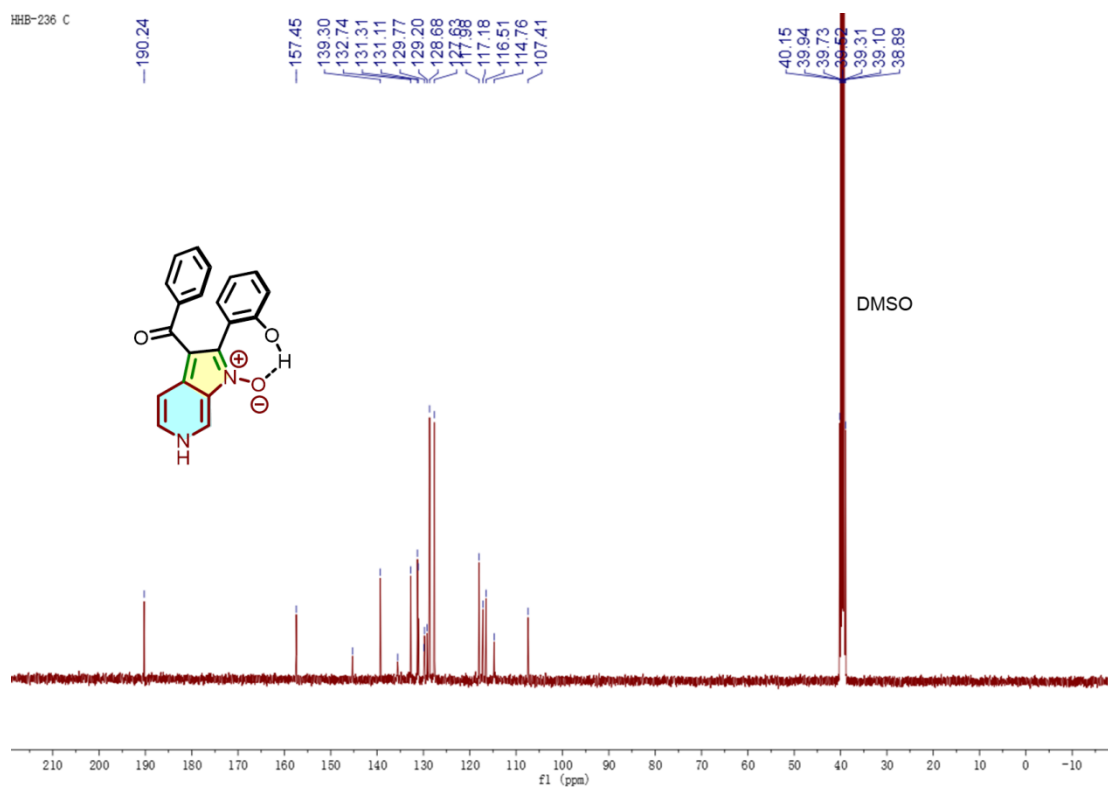

$^1\text{H}$  NMR spectrum of **5** (400 MHz,  $\text{CDCl}_3$ )

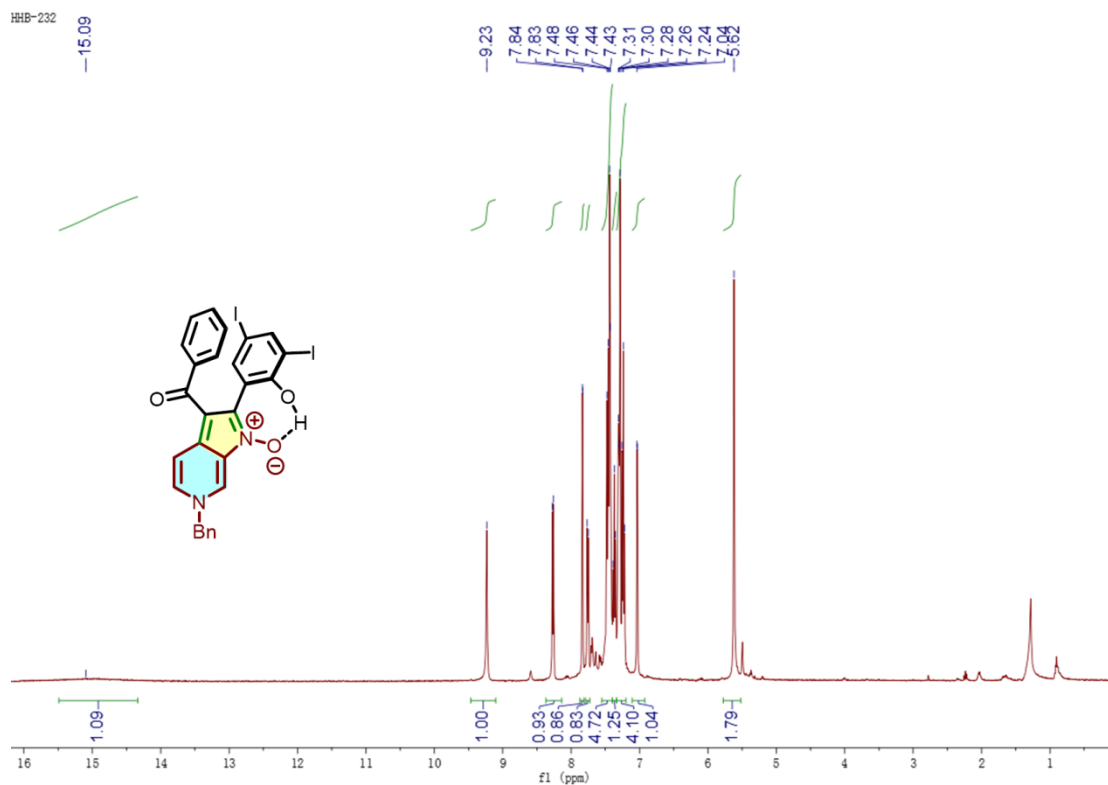

<sup>13</sup>C NMR spectrum of **5** (100 MHz, CDCl<sub>3</sub>)

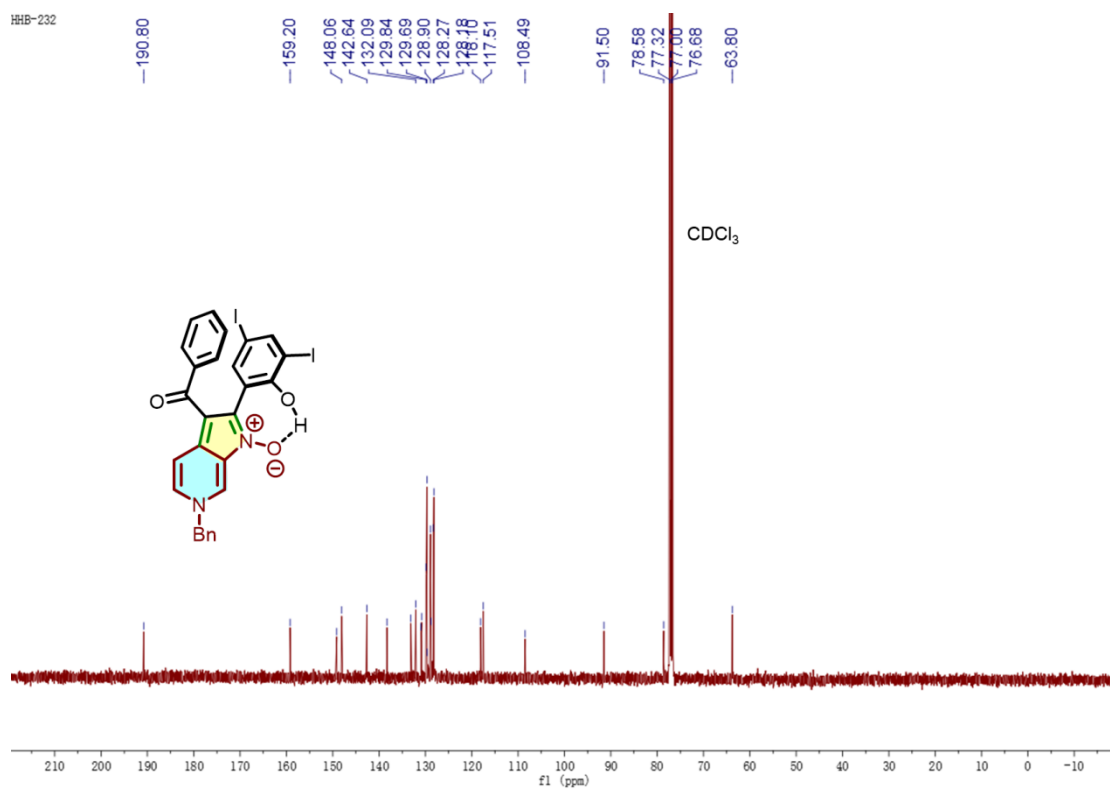

<sup>1</sup>H NMR spectrum of **7** (400 MHz, CDCl<sub>3</sub>)

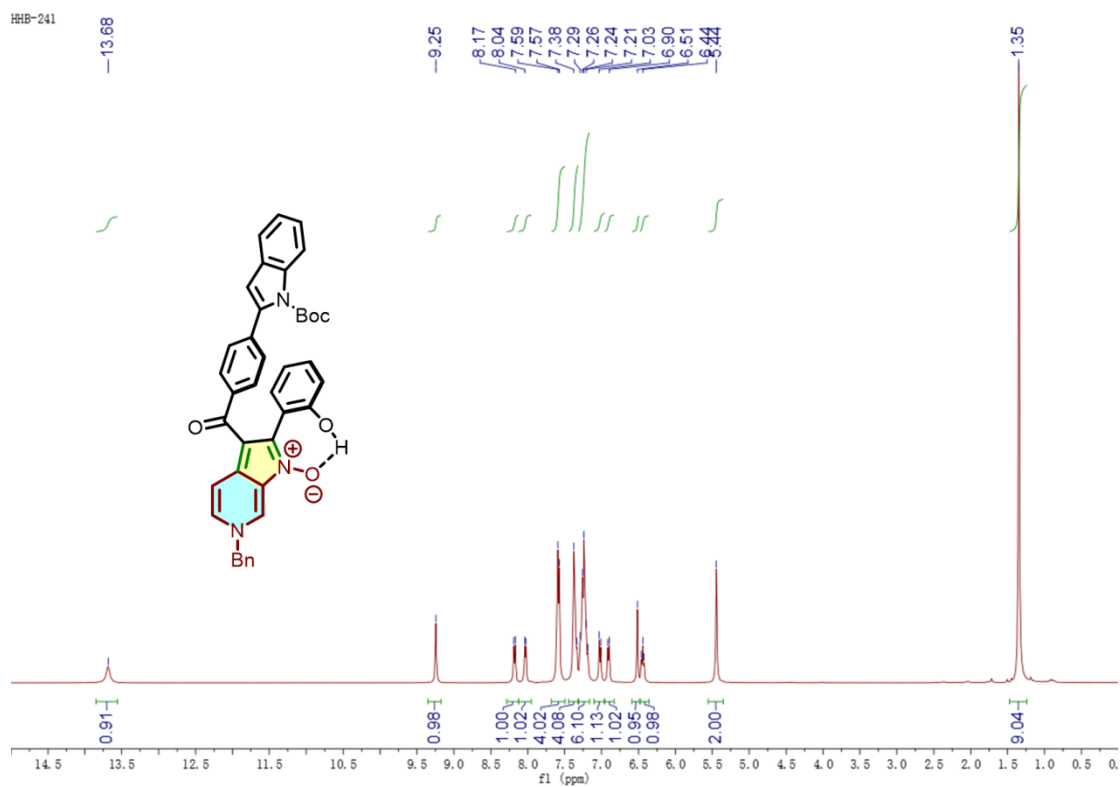

<sup>13</sup>C NMR spectrum of **7** (100 MHz, CDCl<sub>3</sub>)

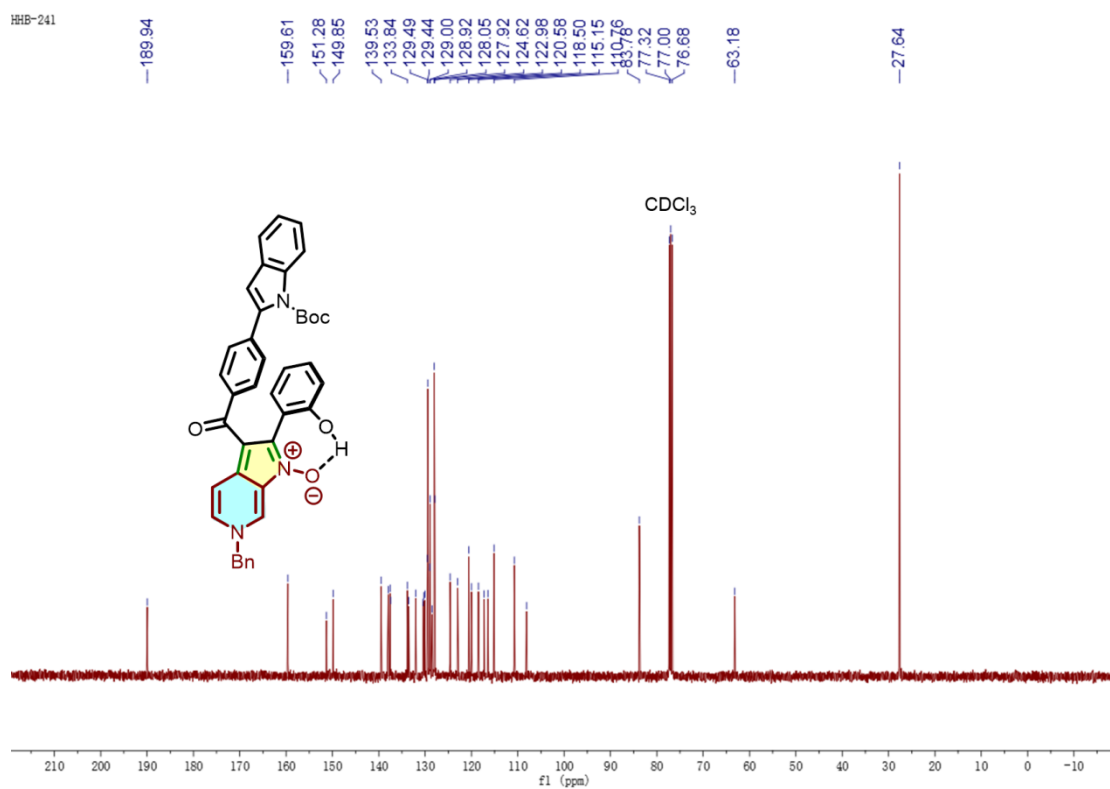

Supplement: d2cc00155a1.pdf [file d2cc00155a1.pdf]
